# Supplementary material for: Knowledge, attitude and practice on diet and physical activity among mothers with young children in the Jhaukhel-Duwakot Health Demographic Surveillance Site, Nepal
Source: PubMed Central journal article supplement (PMC6037384; doi:10.1371/journal.pone.0200329), 2018-07-09
Supplement: pone.0200329.s002.pdf [file pone.0200329.s002.pdf]

## Health promotion for healthy diet and physical activity and its impact on cardiovascular health: A community-based trial among young mothers in a semi-urban community of Nepal

### Questionnaire (baseline survey)

#### I. Basic information

| SN | Question                                                                                                   | Answer                    | Code |
|----|------------------------------------------------------------------------------------------------------------|---------------------------|------|
| 1  | Serial Number of the respondent                                                                            |                           |      |
| 2  | Village                                                                                                    | 1. Duwakot<br>2. Jhaukhel |      |
| 3  | Ward no.                                                                                                   |                           |      |
| 4  | Street/Tole                                                                                                |                           |      |
| 5  | House no                                                                                                   |                           |      |
| 6  | Phone number                                                                                               |                           |      |
| 7  | Name of the head of household                                                                              |                           |      |
| 8  | Husband's name                                                                                             |                           |      |
| 9  | How many persons (adults and children) live permanently (6 months or more) in your household?              | _ _  persons              |      |
| 10 | How many children aged less than 15 years (including responding child live permanently in your household?) | _ _  children             |      |

#### II. Demographic information

##### A. Respondent's (mother's) information

*Now I am going to ask you some information about yourself.*

| SN | Question                                                   | Answer                                                                                                                                                                                                                                                                                                                                                                    | Code |
|----|------------------------------------------------------------|---------------------------------------------------------------------------------------------------------------------------------------------------------------------------------------------------------------------------------------------------------------------------------------------------------------------------------------------------------------------------|------|
| 11 | Name of the respondent                                     |                                                                                                                                                                                                                                                                                                                                                                           |      |
| 12 | What is your year of birth?                                |                                                                                                                                                                                                                                                                                                                                                                           |      |
| 13 | Relation to the head of household                          | 1. Head<br>2. Wife <input type="checkbox"/><br>3. Mother-in-law<br>4. Mother<br>5. Daughter-in-law<br>6. Other (specify) _____                                                                                                                                                                                                                                            |      |
| 14 | What is your religion?                                     | 1. Hindu<br>2. Buddhism <input type="checkbox"/><br>3. Christian<br>4. Islam<br>5. Others (Specify) _____                                                                                                                                                                                                                                                                 |      |
| 15 | What is your ethnicity?                                    | 1. Newar<br>2. Hill Brahmin<br>3. Chhetri<br>4. Tamang <input type="checkbox"/><br>5. Dalit<br>6. Thakuri<br>7. Magar<br>8. Rai<br>9. Others( Specify)_____                                                                                                                                                                                                               |      |
| 16 | What is the highest level of education you have completed? | 1. Cannot read and write<br>2. No formal schooling but can read and write<br>3. Less than primary school (<1 class) <input type="checkbox"/><br>4. Primary school (class 3) completed<br>5. Secondary school (class 10) completed<br>6. High school (certificate /+2) completed<br>7. Graduation(bachelor) completed<br>8. Post graduate (masters) degree<br>9. PhD level |      |
| 17 | What is your main occupation?                              | 1. Agriculture<br>2. Government employee<br>3. Labor <input type="checkbox"/><br>4. Student<br>5. Own business/sale<br>6. Housewife                                                                                                                                                                                                                                       |      |

|    |                                                                          |                                                                                                                                                                                     |  |
|----|--------------------------------------------------------------------------|-------------------------------------------------------------------------------------------------------------------------------------------------------------------------------------|--|
|    |                                                                          | 7. Private company<br>Others (specify)_____                                                                                                                                         |  |
| 18 | Do you work now?                                                         | 1. Yes<br>i. How long you are stay outside home every day(except weekend)?_____ hours<br>2. No                                                                                      |  |
| 19 | What is your marital status?                                             | 1. Married<br>2. Separated <input type="checkbox"/><br>3. Divorced<br>4. Widow<br>5. Unmarried                                                                                      |  |
| 20 | What type of family do you have?                                         | 1. Nuclear <input type="checkbox"/><br>2. Joint                                                                                                                                     |  |
| 21 | During the previous year, what was the household's average month income? | _____ NRs                                                                                                                                                                           |  |
| 22 | What is your husband's main occupation?                                  | 1. Agriculture<br>2. Government employee<br>3. Labor <input type="checkbox"/><br>4. Student<br>5. Own business/sale<br>6. Private company<br>7. Retired<br>8. Others (specify)_____ |  |

*B. Children's information*

Now I am going to ask you some information about your children.

| SN | Question                                                                       | Answer               | Code |
|----|--------------------------------------------------------------------------------|----------------------|------|
| 23 | How many children aged 1 to 7 do you have?<br><br>(Write number in the square) | <input type="text"/> |      |
| 24 | Children information                                                           |                      |      |

|    |                                                                                                                                                                                          |                                                                                                                                                                                                                                                                                                                                         |                          |
|----|------------------------------------------------------------------------------------------------------------------------------------------------------------------------------------------|-----------------------------------------------------------------------------------------------------------------------------------------------------------------------------------------------------------------------------------------------------------------------------------------------------------------------------------------|--------------------------|
|    | (aged 1-7 yr)                                                                                                                                                                            | 1. 1.1.Name _____<br>1.2. Year and month of birth _____<br>1.3. Sex _____<br>1.4. Class completed _____<br><br>2. 2.1. Name _____<br>2.2. Year and month of birth _____<br>2.3. Sex _____<br>2.4. Class completed _____<br><br>3. 3.1. Name _____<br>3.2. Year and month of birth _____<br>3.3. Sex _____<br>3.4. Class completed _____ |                          |
| 25 | Who does take care of your child most of the time?<br><br><i>(Do not read all options to the respondent. Ask question and wait for an answer. Put number in the bracket accordingly)</i> | 1. Mother and father<br>2. Mother<br>3. Father<br>4. Grandparents<br>5. Other relatives<br>6. Caretaker<br>7. Others( specify) _____                                                                                                                                                                                                    | <input type="checkbox"/> |

### III. Knowledge of the mother

#### A. Diet

*I am going to ask you now some questions regarding food and your dietary habits.*

| SN | Question                                                                                                                                     | Answer                                                                                                   | Code                                                                                                                          |
|----|----------------------------------------------------------------------------------------------------------------------------------------------|----------------------------------------------------------------------------------------------------------|-------------------------------------------------------------------------------------------------------------------------------|
| 26 | What do you consider to be a healthy dietary habit for you?<br><br><b>(yes/ no response for each)</b><br><br><i>(Read each option to the</i> | 1. Large quantity of food<br>2. Lot of fresh food<br>3. Large variety of food<br>4. Eating hygienic food | <b>Answer</b><br><input type="checkbox"/><br><input type="checkbox"/><br><input type="checkbox"/><br><input type="checkbox"/> |

|    |                                                                                                                                                                                                                                                                         |                                                                                                                                                                                                                                                                                                                                                                                                                                                                                                                                                                                           |                                                                                                                                                                                                                                                                                                                                                                                                                                                                                                                                                                                                                                                                                                                                                                                                                                                                                                                                                                                                                                                                                                                                                                                                                                                                                                                                                                                                                                                            |
|----|-------------------------------------------------------------------------------------------------------------------------------------------------------------------------------------------------------------------------------------------------------------------------|-------------------------------------------------------------------------------------------------------------------------------------------------------------------------------------------------------------------------------------------------------------------------------------------------------------------------------------------------------------------------------------------------------------------------------------------------------------------------------------------------------------------------------------------------------------------------------------------|------------------------------------------------------------------------------------------------------------------------------------------------------------------------------------------------------------------------------------------------------------------------------------------------------------------------------------------------------------------------------------------------------------------------------------------------------------------------------------------------------------------------------------------------------------------------------------------------------------------------------------------------------------------------------------------------------------------------------------------------------------------------------------------------------------------------------------------------------------------------------------------------------------------------------------------------------------------------------------------------------------------------------------------------------------------------------------------------------------------------------------------------------------------------------------------------------------------------------------------------------------------------------------------------------------------------------------------------------------------------------------------------------------------------------------------------------------|
|    | <p><i>respondent and ask her to answer yes/no. Put “Y” and “N” according answer in the box)</i></p>                                                                                                                                                                     | <p>irrespective of the content</p> <ol style="list-style-type: none"> <li>5. Eating main meals regularly and not snacking in between</li> <li>6. Less sugar/sugary foods</li> <li>7. Lot of vegetables</li> <li>8. Eating smaller portions</li> <li>9. Using less fat in cooking</li> <li>10. Lot of fruit/ fresh juice</li> </ol>                                                                                                                                                                                                                                                        | <div style="display: flex; align-items: center;"> <div style="border: 1px solid black; width: 20px; height: 20px; margin-right: 5px;"></div> <div style="border: 1px solid black; width: 20px; height: 20px; margin-right: 5px;"></div> <div style="border: 1px solid black; width: 20px; height: 20px; margin-right: 5px;"></div> <div style="border: 1px solid black; width: 20px; height: 20px; margin-right: 5px;"></div> <div style="border: 1px solid black; width: 20px; height: 20px; margin-right: 5px;"></div> <div style="border: 1px solid black; width: 20px; height: 20px;"></div> </div>                                                                                                                                                                                                                                                                                                                                                                                                                                                                                                                                                                                                                                                                                                                                                                                                                                                    |
| 27 | <p>I will give you some examples of food. What do you think is healthy food and what is not?</p> <p><b>(yes/ no response for each)</b></p> <p><i>(Read each option to the respondent and ask her to answer yes/no. Put “Y” and “N” according answer in the box)</i></p> | <p><b>Answer</b></p> <ol style="list-style-type: none"> <li>1. Salad</li> <li>2. All food which is available</li> <li>3. Deep fried vegetables</li> <li>4. Sausage, hamburgers, pizza</li> <li>5. Sweetened soft drinks (Fanta, coca-cola, pepsi etc)</li> <li>6. Fruits</li> <li>7. Doughnuts, cookies, candies</li> <li>8. Jam, Desserts</li> <li>9. Chips, kurkure</li> <li>10. Rice, vegetables, dal</li> <li>11. Meat thukpa</li> <li>12. Wai-wai soup</li> <li>13. Roti, vegetables</li> <li>14. <i>Chiura</i></li> <li>15. Traditional sweets (Sel, malpwa, jerry, etc)</li> </ol> | <div style="display: flex; align-items: center;"> <div style="border: 1px solid black; width: 20px; height: 20px; margin-right: 5px;"></div> <div style="border: 1px solid black; width: 20px; height: 20px; margin-right: 5px;"></div> <div style="border: 1px solid black; width: 20px; height: 20px; margin-right: 5px;"></div> <div style="border: 1px solid black; width: 20px; height: 20px; margin-right: 5px;"></div> <div style="border: 1px solid black; width: 20px; height: 20px; margin-right: 5px;"></div> <div style="border: 1px solid black; width: 20px; height: 20px; margin-right: 5px;"></div> <div style="border: 1px solid black; width: 20px; height: 20px; margin-right: 5px;"></div> <div style="border: 1px solid black; width: 20px; height: 20px; margin-right: 5px;"></div> <div style="border: 1px solid black; width: 20px; height: 20px; margin-right: 5px;"></div> <div style="border: 1px solid black; width: 20px; height: 20px; margin-right: 5px;"></div> <div style="border: 1px solid black; width: 20px; height: 20px; margin-right: 5px;"></div> <div style="border: 1px solid black; width: 20px; height: 20px; margin-right: 5px;"></div> <div style="border: 1px solid black; width: 20px; height: 20px; margin-right: 5px;"></div> <div style="border: 1px solid black; width: 20px; height: 20px; margin-right: 5px;"></div> <div style="border: 1px solid black; width: 20px; height: 20px;"></div> </div> |
| 28 | <p>I will mention some disease now. Do you think developing of these conditions is associated with</p>                                                                                                                                                                  | <p><b>Answer</b></p> <ol style="list-style-type: none"> <li>1. Bad teeth</li> <li>2. Injuries</li> <li>3. Diabetes</li> </ol>                                                                                                                                                                                                                                                                                                                                                                                                                                                             | <p><b>Score</b></p> <div style="display: flex; align-items: center;"> <div style="border: 1px solid black; width: 20px; height: 20px; margin-right: 5px;"></div> <div style="border: 1px solid black; width: 20px; height: 20px; margin-right: 5px;"></div> <div style="border: 1px solid black; width: 20px; height: 20px;"></div> </div>                                                                                                                                                                                                                                                                                                                                                                                                                                                                                                                                                                                                                                                                                                                                                                                                                                                                                                                                                                                                                                                                                                                 |

|    |                                                                                                                                                                                                                                                                                                      |                                                                                                                                                                                                                                                                                                                                                                                                                                                                                                                                                                                                                                                                                                                                                          |  |
|----|------------------------------------------------------------------------------------------------------------------------------------------------------------------------------------------------------------------------------------------------------------------------------------------------------|----------------------------------------------------------------------------------------------------------------------------------------------------------------------------------------------------------------------------------------------------------------------------------------------------------------------------------------------------------------------------------------------------------------------------------------------------------------------------------------------------------------------------------------------------------------------------------------------------------------------------------------------------------------------------------------------------------------------------------------------------------|--|
|    | <p>unhealthy diet? Answer “Yes” or “No” for each condition.</p> <p>Do you know health risk associated with unhealthy food?</p> <p><b>(Yes/No response for each)</b></p> <p><i>(Read each option to the respondent and ask her to answer yes/no. Put “Y” and “N” according answer in the box)</i></p> | <p>4. Leprosy</p> <p>5. Heart diseases</p> <p>6. High blood pressure</p> <p>7. Rabies</p> <p>8. Malaria</p> <p>9. HIV/AIDS</p> <p>10. Cancer</p> <div style="display: flex; align-items: center;"> <div style="border: 1px solid black; width: 20px; height: 20px; margin-right: 5px;"></div> <div style="border: 1px solid black; width: 20px; height: 20px; margin-right: 5px;"></div> <div style="border: 1px solid black; width: 20px; height: 20px; margin-right: 5px;"></div> <div style="border: 1px solid black; width: 20px; height: 20px; margin-right: 5px;"></div> <div style="border: 1px solid black; width: 20px; height: 20px; margin-right: 5px;"></div> <div style="border: 1px solid black; width: 20px; height: 20px;"></div> </div> |  |
| 29 | <p>Do you think that food we eat affect our heart?</p> <p><i>(Ask question and wait for answer. If it is difficult for respondent to respond read the given options)</i></p>                                                                                                                         | <p>1. Yes</p> <p>2. No</p> <p>3. Have not thought about it</p> <p>4. I don’t care</p> <p>5. I don’t know</p> <p>6. Others (specify)_____</p> <div style="display: flex; align-items: center;"> <div style="border: 1px solid black; width: 30px; height: 30px; margin-right: 5px;"></div> </div>                                                                                                                                                                                                                                                                                                                                                                                                                                                         |  |
| 30 | <p>What is junk food?</p> <p><i>(Ask respondent to give any 3 statements regarding junk food. It maybe food examples or some characteristic)</i></p>                                                                                                                                                 | <p>1. _____</p> <p>2. _____</p> <p>3. _____</p> <p>_____</p>                                                                                                                                                                                                                                                                                                                                                                                                                                                                                                                                                                                                                                                                                             |  |
| 31 | <p>Do you think your family consumes healthy food at home?</p>                                                                                                                                                                                                                                       | <p>1. Very healthy</p> <p>2. Quite healthy</p> <p>3. Not very healthy</p> <p>4. Very unhealthy</p> <p>5. Don’t know</p> <div style="display: flex; align-items: center;"> <div style="border: 1px solid black; width: 30px; height: 30px; margin-right: 5px;"></div> </div>                                                                                                                                                                                                                                                                                                                                                                                                                                                                              |  |

32. Healthy diet should contain:

*I am going to ask your opinion regarding role of different food components for health. What amount (high or low) of each component should be present in healthy diet?*

| Items            | A. High content | B. Low content | C. Amount is not important for health | D. Don't know | Code |
|------------------|-----------------|----------------|---------------------------------------|---------------|------|
| 32.1 Salt        |                 |                |                                       |               |      |
| 32.2 Sugar       |                 |                |                                       |               |      |
| 32.3 Grain foods |                 |                |                                       |               |      |
| 32.4 Fruits      |                 |                |                                       |               |      |
| 32.5 Vegetables  |                 |                |                                       |               |      |
| 32.6 Fat         |                 |                |                                       |               |      |

B. Physical activity

*Now I am going to ask you what you know about physical activity.*

| SN | Question                                                                                                                                                                                                                              | Answer                                                                                                                                                                                                                                                                                               | Code |
|----|---------------------------------------------------------------------------------------------------------------------------------------------------------------------------------------------------------------------------------------|------------------------------------------------------------------------------------------------------------------------------------------------------------------------------------------------------------------------------------------------------------------------------------------------------|------|
| 33 | <p>What is the role of physical activity for health?</p> <p><i>Ask respondent to give any for statements according her understanding.</i></p>                                                                                         | <p>1. _____</p> <p>2. _____</p> <p>3. _____</p> <p>4. _____</p>                                                                                                                                                                                                                                      |      |
| 34 | <p>What are the effects of physical activity on our health?</p> <p><b>(Yes/No response for each)</b></p> <p><i>(Read each option to the respondent and ask her to answer yes/no. Put "Y" and "N" according answer in the box)</i></p> | <p><b>Answer</b></p> <p>1. Improve physical health</p> <p>2. Deteriorate our physical health</p> <p>3. Improve mental health</p> <p>4. Help fight with diseases</p> <p>5. Cause injuries</p> <p>6. Cause depression and frustration</p> <p>7. Bad for the heart</p> <p>8. Help us to look better</p> |      |

|  |                                                                     |                          |
|--|---------------------------------------------------------------------|--------------------------|
|  | 9. Help avoid injuries                                              |                          |
|  | 10. Nothing/none/no effect<br><i>(If answer is Yes, go to Q.35)</i> | <input type="checkbox"/> |

35. What is the role of physical activity in the developing of the following diseases?

I will now give you examples of some diseases. Please tell me do you think physical activity is important in developing those diseases or not.

*Put tick (√) in the appropriate box.*

| Condition                | A. Important | B. Not important | C. Don't know | Code |
|--------------------------|--------------|------------------|---------------|------|
| 35.1 Diabetes            |              |                  |               |      |
| 35.2 Cancer              |              |                  |               |      |
| 35.3 HIV/AIDS            |              |                  |               |      |
| 35.4 Gastritis           |              |                  |               |      |
| 35.5 Obesity             |              |                  |               |      |
| 35.6 Cataract            |              |                  |               |      |
| 35.7 High blood pressure |              |                  |               |      |
| 35.8 Brain tumor         |              |                  |               |      |
| 35.9 Appendicitis        |              |                  |               |      |

#### IV. Attitude of mothers

##### A. Diet

36. I will read you some statements. Please, give your opinion regarding those statements. You are “strongly agree,” “agree,” “disagree”, “strongly disagree” or “neutral”.

Give your opinion regarding statements given below:

*Put tick (√) in the appropriate box. The answer can be only one for each statement.*

| Statements                       | A. Strongly Agree | B. Agree | C. Disagree | D. Strongly disagree | E. Neutral | Code |
|----------------------------------|-------------------|----------|-------------|----------------------|------------|------|
| 36.1 Healthy food is important   |                   |          |             |                      |            |      |
| 36.2 Healthy foods are enjoyable |                   |          |             |                      |            |      |



|       |                                                                 |  |  |  |  |  |
|-------|-----------------------------------------------------------------|--|--|--|--|--|
| 36.3  | I really care about what I eat                                  |  |  |  |  |  |
| 36.4  | Healthy food is not tasty                                       |  |  |  |  |  |
| 36.5  | Healthy food is for sick people                                 |  |  |  |  |  |
| 36.6  | If you do enough exercise you can eat whatever you like         |  |  |  |  |  |
| 36.7  | If you don't have any symptoms you can eat whatever you like    |  |  |  |  |  |
| 36.8  | Tastiest foods are the ones that are bad for you                |  |  |  |  |  |
| 36.9  | I should do a lot more about me and my children's health        |  |  |  |  |  |
| 36.10 | I wouldn't let my children eat junk food                        |  |  |  |  |  |
| 36.11 | I always think of the calories in what I eat                    |  |  |  |  |  |
| 36.12 | Soft drinks are good in the summer                              |  |  |  |  |  |
| 36.13 | I buy soft drinks for my child because they are good for health |  |  |  |  |  |
| 36.14 | When I become ill it's a matter of fate.                        |  |  |  |  |  |
| 36.15 | I can stay healthy by taking good care of myself.               |  |  |  |  |  |

| SN | Question                                                                                                                                                                                                                                                                                   | Answer                                                                                                                                                                                                                                                                                                    | Code |
|----|--------------------------------------------------------------------------------------------------------------------------------------------------------------------------------------------------------------------------------------------------------------------------------------------|-----------------------------------------------------------------------------------------------------------------------------------------------------------------------------------------------------------------------------------------------------------------------------------------------------------|------|
| 37 | <p>I will tell you different types of food one by one. Which food items out of them you consider to be tasty for you?</p> <p><b>(Yes/No response for each)</b></p> <p><i>(Read each option to the respondent and ask her to answer yes/no. Put "Y" and "N" according answer in the</i></p> | <p><b>Answer</b></p> <ol style="list-style-type: none"> <li>1. Deep fried vegetables</li> <li>2. Sausage, pizza</li> <li>3. Sweetened soft drinks<br/>(Fanta, coca-cola, pepsi)</li> <li>4. Fruits</li> <li>5. Doughnuts, cookies, candies</li> <li>6. Jam, Deserts</li> <li>7. Chips, kurkure</li> </ol> |      |

|    |                                                                                                                                                                                                                                                                        |                                                                                                                                                                                                                                                                                                                                                                                                                    |  |
|----|------------------------------------------------------------------------------------------------------------------------------------------------------------------------------------------------------------------------------------------------------------------------|--------------------------------------------------------------------------------------------------------------------------------------------------------------------------------------------------------------------------------------------------------------------------------------------------------------------------------------------------------------------------------------------------------------------|--|
|    | <p>box)</p>                                                                                                                                                                                                                                                            | <p>8. Rice, vegetables, dal</p> <p>9. Meat thukpa <input type="checkbox"/></p> <p>10. Wai-wai <input type="checkbox"/></p> <p>11. Roti, vegetables <input type="checkbox"/></p> <p>12. Salad <input type="checkbox"/></p>                                                                                                                                                                                          |  |
| 38 | <p>Where do you get your nutrition information?</p> <p><b>(Multiple answer question)</b></p> <p><i>(Ask question and wait for answer. If it is difficult for respondent to respond read the given options)</i></p>                                                     | <p>1. Own mother, mother in law, other relatives</p> <p>2. Friends, neighbors <input type="checkbox"/></p> <p>3. TV, newspapers</p> <p>4. Books</p> <p>5. Internet</p> <p>6. Others (specify)_____</p> <p>7. I don't have nutrition information</p> <p>8. Don't know</p>                                                                                                                                           |  |
| 39 | <p>If you feel you have inadequate knowledge regarding which food is good or bad for health would you try to find such information yourself?</p> <p><i>(Ask question and wait for answer. If it is difficult for respondent to respond read the given options)</i></p> | <p>1. Yes, I will ask someone who knows</p> <p>2. I will try to read it somewhere</p> <p>3. If the doctor hasn't told me anything it means it's not important <input type="checkbox"/></p> <p>4. No, I don't know where to search and whom to ask</p> <p>5. No, I can manage my food style without those knowledge</p> <p>6. Never thought about it before</p> <p>7. Others(specify)_____</p> <p>8. Don't know</p> |  |
| 40 | <p>Do you want to improve your family's food pattern?</p> <p><i>(Circle the answer)</i></p>                                                                                                                                                                            | <p>1. Yes</p> <p>i. If yes, why? _____</p> <p>_____</p> <p>ii. What changes would you like to make?</p> <p>_____</p> <p>_____</p> <p>2. No</p> <p>i. If no, why? _____</p>                                                                                                                                                                                                                                         |  |

|    |                                                                                                                                                                                                                                       |                                                                                                                                                                                                                                                                                                                                                                                                                                                                                                 |  |
|----|---------------------------------------------------------------------------------------------------------------------------------------------------------------------------------------------------------------------------------------|-------------------------------------------------------------------------------------------------------------------------------------------------------------------------------------------------------------------------------------------------------------------------------------------------------------------------------------------------------------------------------------------------------------------------------------------------------------------------------------------------|--|
|    |                                                                                                                                                                                                                                       | _____                                                                                                                                                                                                                                                                                                                                                                                                                                                                                           |  |
|    |                                                                                                                                                                                                                                       | 3. Don't know                                                                                                                                                                                                                                                                                                                                                                                                                                                                                   |  |
| 41 | <p>What difficulties might you have with eating more healthy food?</p> <p><b>(Multiple answer question)</b></p> <p><i>(Ask question and wait for answer. If it is difficult for respondent to respond read the given options)</i></p> | <ol style="list-style-type: none"> <li>1. No difficulty trying to eat healthier</li> <li>2. Cooking skills</li> <li>3. Don't know enough about healthy eating</li> <li>4. Busy lifestyle <input type="checkbox"/></li> <li>5. Taste preferences of household members <input type="checkbox"/></li> <li>6. I don't want to give up foods that I like</li> <li>7. Price of healthy foods</li> <li>8. Lack of will power</li> <li>9. Others (specify)_____</li> <li>10. Don't know</li> </ol>      |  |
| 42 | <p>Which factors could support you to eat more healthy food?</p> <p><b>(Multiple answer question)</b></p> <p><i>(Ask question and wait for answer. If it is difficult for respondent to respond read the given options)</i></p>       | <ol style="list-style-type: none"> <li>1. Own ill health</li> <li>2. Advice from a doctor or nurse</li> <li>3. Disease or death of a close relative</li> <li>4. More money/ healthier food being less expensive <input type="checkbox"/></li> <li>5. Better shops in the local area</li> <li>6. Family members eating healthier food</li> <li>7. Better information about food/ healthy eating</li> <li>8. Nothing</li> <li>9. Something else (specify)_____</li> <li>10. Don't know</li> </ol> |  |
| 43 | <p>Do you want to change your child food pattern?</p> <p><i>(Circle the answer)</i></p>                                                                                                                                               | <ol style="list-style-type: none"> <li>1. Yes</li> <li>i. If yes, why?_____</li> <li>_____</li> <li>iii. What changes would you like to make?</li> <li>_____</li> <li>_____</li> </ol>                                                                                                                                                                                                                                                                                                          |  |

|    |                                                                                                                                                                                                               |                                                                                                                                                                                                                              |                          |
|----|---------------------------------------------------------------------------------------------------------------------------------------------------------------------------------------------------------------|------------------------------------------------------------------------------------------------------------------------------------------------------------------------------------------------------------------------------|--------------------------|
|    |                                                                                                                                                                                                               | 2. No<br>ii. If no, why? _____<br>_____                                                                                                                                                                                      |                          |
| 44 | Do you think that when children feel upset/bad mood, a favorite food will make them feel better?                                                                                                              | 1. Yes<br>2. No<br>3. Don't know                                                                                                                                                                                             | <input type="checkbox"/> |
| 45 | Do you think that if you love your child you should please him/her by buying favorite sweets?                                                                                                                 | 1. Agree<br>2. Do not agree<br>3. Don't know                                                                                                                                                                                 | <input type="checkbox"/> |
| 46 | What do you think affects child's food choice?<br><br><b>(Multiple answer question)</b><br><br><i>(Ask question and wait for answer. If it is difficult for respondent to respond read the given options)</i> | 1. Family's food preferences<br>2. Mother's food preferences<br>3. Teaching in the school<br>4. Advertisement<br>5. Child's friends<br>6. Neighbors<br>7. Nothing is affecting<br>8. Others (specify) _____<br>9. Don't know | <input type="checkbox"/> |

47. Comment following statements:

I will read you some statements. Please, give your opinion regarding those statements. You are "agree," "moderately agree," moderately disagree", "disagree" or "neutral".

*Put tick (√) in the appropriate box. The answer can be only one for each statement.*

| Statements                                                                                                      | A.<br>Agree | B<br>Moderately<br>agree | B.<br>Moderately<br>disagree | D-<br>Disagree | E-<br>Neutr<br>al | Code |
|-----------------------------------------------------------------------------------------------------------------|-------------|--------------------------|------------------------------|----------------|-------------------|------|
| 47.1 . Media food advertising assists parents in their efforts to feed their child a healthy and balanced diet. |             |                          |                              |                |                   |      |

|                                                                                                                                             |  |  |  |  |  |  |
|---------------------------------------------------------------------------------------------------------------------------------------------|--|--|--|--|--|--|
| 47.2. Media food advertising leads children and their parents to spend their money on unnecessary and sometimes even harmful food products. |  |  |  |  |  |  |
| 47.3. Media food advertising is largely responsible for the weight problems and bad teeth of many children.                                 |  |  |  |  |  |  |

**B. Physical activity**

*I am going to ask your opinion regarding physical activity.*

48. Give your opinion regarding statements given below:

I will read you some statements. Please, give your opinion regarding those statements. You are “strongly agree”, “agree”, “disagree”, “strongly disagree” or “neutral”.

*Put tick (✓) in the appropriate box. The answer can be only one for each statement.*

| <b>Statements</b>                                         | <b>A.<br/>Strongly<br/>Agree</b> | <b>B.-<br/>Agree</b> | <b>C<br/>Disagree</b> | <b>D<br/>Strongly<br/>disagree</b> | <b>E<br/>Neutral</b> | <b>Code</b> |
|-----------------------------------------------------------|----------------------------------|----------------------|-----------------------|------------------------------------|----------------------|-------------|
| 48.1 Physical activity is important for children’s health |                                  |                      |                       |                                    |                      |             |
| 48.2 Overweight children are more attractive              |                                  |                      |                       |                                    |                      |             |
| 48.3 Overweight children are healthier                    |                                  |                      |                       |                                    |                      |             |
| 48.4 I am enjoying physical activity                      |                                  |                      |                       |                                    |                      |             |
| 48.5 Physical activity is not important for adults        |                                  |                      |                       |                                    |                      |             |
| 48.6 Low physical activity is linked to overweight and    |                                  |                      |                       |                                    |                      |             |

|                                                                                                        |  |  |  |  |  |  |
|--------------------------------------------------------------------------------------------------------|--|--|--|--|--|--|
| obesity                                                                                                |  |  |  |  |  |  |
| 48.7 I eat less hence I don't need to be physically active                                             |  |  |  |  |  |  |
| 48.8 I don't want to do more physical activity because it increases my appetite and increase my weight |  |  |  |  |  |  |
| 48.9 After been diagnosed with heart disease one should restrict his/her physical activity             |  |  |  |  |  |  |
| 48.10 Overweight people are more attractive                                                            |  |  |  |  |  |  |
| 48.11 The school has a responsibility for making sure my child gets enough exercise                    |  |  |  |  |  |  |
| 48.12. I restrict my child playing outside for safety reasons                                          |  |  |  |  |  |  |
| 48.13. Parents have the main responsibility for making sure their child gets enough exercise           |  |  |  |  |  |  |
| 48.14. Children's TV, electronic games and computer use should be restricted by their parents          |  |  |  |  |  |  |

| SN | Question                                                                                                                                                                                                                          | Answer                                                                                                                                                                                                                                 | Code                     |
|----|-----------------------------------------------------------------------------------------------------------------------------------------------------------------------------------------------------------------------------------|----------------------------------------------------------------------------------------------------------------------------------------------------------------------------------------------------------------------------------------|--------------------------|
| 49 | <p>If you need to reach some place which is more than 20-30 min walking distance what would you prefer?</p> <p><i>(Ask question and wait for answer. If it is difficult for respondent to respond read the given options)</i></p> | <ol style="list-style-type: none"> <li>1. Cycling</li> <li>2. Motorbike</li> <li>3. Walking</li> <li>4. Local bus</li> <li>5. I will not go because it is too far</li> <li>6. Others (Specify) _____</li> <li>7. Don't know</li> </ol> | <input type="checkbox"/> |
| 50 | How would you rate your physical activity status?                                                                                                                                                                                 | <ol style="list-style-type: none"> <li>1. Very physically active</li> <li>2. Fairly physically active</li> <li>3. Not very physically active</li> <li>4. Not at all physically active</li> </ol>                                       | <input type="checkbox"/> |

|    |                                                                                                   |                                                                                                                                                                                                                                                                                                                                                      |                          |
|----|---------------------------------------------------------------------------------------------------|------------------------------------------------------------------------------------------------------------------------------------------------------------------------------------------------------------------------------------------------------------------------------------------------------------------------------------------------------|--------------------------|
|    |                                                                                                   | 5. Don't know                                                                                                                                                                                                                                                                                                                                        |                          |
| 51 | Why did you choose to be physically active?                                                       | 1. To maintain good health<br>2. My regular duty<br>3. To get or feel fit<br>4. Others (specify) _____<br>5. Nor physically active<br>6. Don't know                                                                                                                                                                                                  | <input type="checkbox"/> |
| 52 | Do you want to change your physical activity?                                                     | 1. Yes<br>i. If yes, why? _____<br>_____<br>ii. What changes would you like to make?<br>_____<br>_____<br>2. No<br>iii. If no, why? _____<br>_____<br>3. Don't know                                                                                                                                                                                  |                          |
| 53 | What are barriers for you to participate in physical activity?<br><br>(Multiple answer questions) | 1. Lack of leisure time<br>2. Caring for children or older people<br>3. Lack of parks or other places for physical activity<br>4. Not feel the need to do more physical activity<br>5. Having other things to do<br>6. Own ill health<br>7. Feeling lazy<br>8. Feeling embarrassed in front of others<br>9. Others (specify) _____<br>10. Don't know | <input type="checkbox"/> |
| 54 | What are the factors facilitating you to be physically active?<br><br>(Multiple answer questions) | 1. Own ill health<br>2. Advice from a doctor or nurse<br>3. Disease or death of a close relative<br>4. Support by friends, relatives<br>5. Better information regarding importance of physical activity<br>6. Availability of special places (parks, playgrounds etc.)<br>7. Nothing                                                                 | <input type="checkbox"/> |

|    |                                                                                                            |                                                                                                                                                                                                                                                                 |                          |
|----|------------------------------------------------------------------------------------------------------------|-----------------------------------------------------------------------------------------------------------------------------------------------------------------------------------------------------------------------------------------------------------------|--------------------------|
|    |                                                                                                            | 8. Something else (specify) _____<br>_____<br>9. Don't know                                                                                                                                                                                                     |                          |
| 55 | How would you rate your child's physical activity status?                                                  | 1. Very physically active<br>2. Fairly physically active<br>3. Not very physically active<br>4. Not at all physically active<br>5. Don't know                                                                                                                   | <input type="checkbox"/> |
| 56 | Do you want to change your child's physical activity?                                                      | 1. Yes<br>i. If yes, why? _____<br>_____<br>ii. What changes would you like to make?<br>_____<br>_____<br>2. No<br>i. If no, why? _____<br>_____<br>3. Don't know                                                                                               |                          |
| 57 | What are barriers for your child to be physically active?<br><b>(Multiple answer question)</b>             | 1. Too much homework<br>2. Lack of place to play outside the house<br>3. No friends to play with<br>4. Too dangerous to let child to play outside<br>5. My child has no barriers<br>6. Others(specify) _____<br>7. Don't know                                   | <input type="checkbox"/> |
| 58 | What are the factors facilitating your child to be physically active?<br><b>(Multiple answer question)</b> | 1. Physical activity is encouraged by parents<br>2. Availability of playgrounds outside<br>3. Parents and child spend time playing together<br>4. More free time<br>5. Friends<br>6. Load-shedding of electricity<br>7. Others (Specify) _____<br>8. Don't know | <input type="checkbox"/> |
| 59 | Do you think you can influence                                                                             | 1. Yes                                                                                                                                                                                                                                                          | <input type="checkbox"/> |



|  |                                 |                        |  |
|--|---------------------------------|------------------------|--|
|  | your child's physical activity? | 2. No<br>3. Don't know |  |
|--|---------------------------------|------------------------|--|

### III. Behavior of mothers and children

#### A. Family dietary pattern

| SN | Question                                                          | Answer                                                                                                                                                                                                                           | Code |
|----|-------------------------------------------------------------------|----------------------------------------------------------------------------------------------------------------------------------------------------------------------------------------------------------------------------------|------|
| 60 | Who is usually cooking in your family?                            | 1. Yourself<br>2. Husband <input type="checkbox"/><br>3. Father in law<br>4. Mother in law<br>5. Servant<br>6. Others (specify) _____                                                                                            |      |
| 61 | Who is making decision regarding way of cooking and what to cook? | 1. Yourself<br>2. Husband<br>3. Father in law<br>4. Mother in law <input type="checkbox"/><br>5. Servant<br>6. Children<br>7. Others (specify) _____                                                                             |      |
| 62 | How often is your family eating out together?                     | 1. Every day<br>2. Every alternate day<br>3. Once a week<br>4. Once a month<br>5. Never<br>6. Others (specify) _____<br>7. Don't know                                                                                            |      |
| 63 | Do you eat differently during the weekend compared to the week?   | 1. Same food as on others days<br>2. Cooking something special <input type="checkbox"/><br>3. Going eating to relative's, friend's house<br>4. Going out (café, pasal, restaurant)<br>5. Others (specify) _____<br>6. Don't know |      |

|    |                                                                     |                                                                                                                                                                                                                                                                           |  |
|----|---------------------------------------------------------------------|---------------------------------------------------------------------------------------------------------------------------------------------------------------------------------------------------------------------------------------------------------------------------|--|
| 64 | Do you give your child the same food which you eat usually at home? | 1. Yes<br>2. No <input type="checkbox"/><br>i.If No, why?<br>_____<br>3. Others (specify) _____<br>4. Don't know                                                                                                                                                          |  |
| 65 | Are sweetened soft drinks available at home during meals?           | 1. Yes, often or always<br>2. Sometimes <input type="checkbox"/><br>3. No or seldom<br>4. Don't know                                                                                                                                                                      |  |
| 66 | Do you limit the amount of junk food at your home?                  | 1. Don't know what junk food is<br>2. Try to keep healthy food at home but still have some unhealthy food <input type="checkbox"/><br>3. Don't care which food to give to the family<br>4. Having only healthy food at home<br>5. Others (specify) _____<br>6. Don't know |  |

*B.Child's dietary pattern*

| SN | Question                                     | Answer                                                                                                                                                                                                                                                               | Code |
|----|----------------------------------------------|----------------------------------------------------------------------------------------------------------------------------------------------------------------------------------------------------------------------------------------------------------------------|------|
| 67 | What does your child eat during school time? | 1. Taking tiffin from home every day<br>2. Sometimes eat at school sometimes take tiffin from home <input type="checkbox"/><br>3. Eat only school food<br>4. Buying food from nearby shops<br>5. Others (specify) _____<br>6. Doesn't attend school<br>7. Don't know |      |
| 68 | Where does your child eat healthiest food?   | 1. At home<br>2. At school <input type="checkbox"/><br>3. Out                                                                                                                                                                                                        |      |

|    |                                                                              |                                                                                                                                                                                                                                                                         |                          |
|----|------------------------------------------------------------------------------|-------------------------------------------------------------------------------------------------------------------------------------------------------------------------------------------------------------------------------------------------------------------------|--------------------------|
|    |                                                                              | 4. Other (specify) _____<br>5. Don't know                                                                                                                                                                                                                               |                          |
| 69 | How often does your child get pocket money?                                  | 1. Every day<br>2. Two-three times a week<br>3. Once a week<br>4. Never<br>5. Others (specify) _____<br>6. Don't know                                                                                                                                                   | <input type="checkbox"/> |
| 70 | How does your child usually spend them?<br><b>(Multiple answer question)</b> | 1. Buying some food<br>2. Buying chocolates<br>3. Buying drinks (coke, fanta etc)<br>4. Buying toys<br>5. Playing games in the internet cafe<br>6. Saving<br>7. Others (specify) _____<br>8. I don't care<br>9. I don't give pocket money to my child<br>10. Don't know | <input type="checkbox"/> |

71. What types of foods does your child usually eat as a snack?

| Items                              | A.<br>Often | B.<br>Sometimes | C.<br>Seldom | Code |
|------------------------------------|-------------|-----------------|--------------|------|
| 71.1. Chaomin                      |             |                 |              |      |
| 71.2. Wai-wai                      |             |                 |              |      |
| 71.3. Homemade vegetables and roti |             |                 |              |      |
| 71.4. Chura, meat or vegetables    |             |                 |              |      |
| 71.5. Biscuits, bread              |             |                 |              |      |
| 71.6. Sweets                       |             |                 |              |      |
| 71.7. Chaatpate, samosa, pani puri |             |                 |              |      |
| 71.8. Momo                         |             |                 |              |      |
| 71.9. Egg                          |             |                 |              |      |
| 71.10. Milk                        |             |                 |              |      |

|                                              |  |  |  |  |
|----------------------------------------------|--|--|--|--|
| 71.11. Dahi                                  |  |  |  |  |
| 71.12. Fresh salad (carrot, cucumber, mulla) |  |  |  |  |
| 71.13. Others (specify)                      |  |  |  |  |

| SN | Question                                                                                | Answer                                                                                                                                                                                                                                                         | Code |
|----|-----------------------------------------------------------------------------------------|----------------------------------------------------------------------------------------------------------------------------------------------------------------------------------------------------------------------------------------------------------------|------|
| 72 | Name 3 most favorite food items of your child.                                          | 1. _____<br>2. _____<br>3. _____<br>4. Don't know                                                                                                                                                                                                              |      |
| 73 | What are your child's favorite drinks?<br><br><b>(Multiple answer question)</b>         | 1. Water<br>2. Milk<br>3. Tea <input data-bbox="1052 842 1247 919" type="text"/><br>4. Real juice, Slice<br>5. Soft drinks (coca cola, fanta, dew, sprite)<br>6. Fresh juice<br>7. Horlicks, Complan<br>8. Tang<br>9. Others (specify) _____<br>10. Don't know |      |
| 74 | How often does your child consume soft drinks?                                          | 1. Every day<br>2. Twice a day<br>3. Twice a week <input data-bbox="1144 1245 1247 1339" type="text"/><br>4. Once a week<br>5. Never<br>6. Others (specify) _____<br>7. Don't know                                                                             |      |
| 75 | Does your child eat while watching TV?                                                  | 1. Yes<br>i. If yes, how often? _____ days/week<br><br>2. No (go to Q. 77)<br>3. Don't know                                                                                                                                                                    |      |
| 76 | If yes, which food/drinks does he/she prefer to eat while watching TV, playing computer | 1. Fruits<br>2. Cookies <input data-bbox="1089 1770 1284 1850" type="text"/><br>3. Chips, kurkure, wai-wai                                                                                                                                                     |      |

|    |                                                                                                                                           |                                                                                                                                                           |  |
|----|-------------------------------------------------------------------------------------------------------------------------------------------|-----------------------------------------------------------------------------------------------------------------------------------------------------------|--|
|    | games?<br><b>(Multiple answer question)</b>                                                                                               | 4. Candy, chocolates<br>5. Nuts, dry fruits<br>6. Soft drinks<br>7. Others (specify)_____                                                                 |  |
| 77 | Does your child ask you to buy food items he/she saw on TV?                                                                               | 1. Never<br>2. Sometimes <input type="checkbox"/><br>3. Often<br>4. My child hardly watches TV<br>5. Don't know                                           |  |
| 78 | Suppose you are in a market/shop, and your child asks for a specific food item that you did not think of buying initially, do you buy it? | 1. Usually not<br>2. Sometimes <input type="checkbox"/><br>3. Often<br>4. Only if I have the money<br>5. Only if it is something healthy<br>6. Don't know |  |
| 79 | Where does your child usually have breakfast?                                                                                             | 1. Home<br>2. School <input type="checkbox"/><br>3. On the way to school (shops, café, street vendors)<br>4. Others (specify)_____                        |  |
| 80 | What does your child usually eat at breakfast?                                                                                            | 1. _____<br>2. _____<br>3. _____                                                                                                                          |  |
| 81 | What does your child usually eat at dinner?                                                                                               | 1. _____<br>2. _____                                                                                                                                      |  |

C. *Physical activity*

82. Mother's vigorous activities ( for at least 10 minutes at time)

| <b>82.1 Work</b><br>(heavy lifting , digging or construction)                                                                                                                                                                                                                                                                                                                                                                                                                                                                                                                                                    | <b>Code</b>                                                                     | <b>82.2 Leisure time</b><br>(running or strenuous sports, weight lifting)                                                                                                                                                                                                                                                                                                                                                                                                                                                                                                                                        | <b>Code</b>                                                                      |
|------------------------------------------------------------------------------------------------------------------------------------------------------------------------------------------------------------------------------------------------------------------------------------------------------------------------------------------------------------------------------------------------------------------------------------------------------------------------------------------------------------------------------------------------------------------------------------------------------------------|---------------------------------------------------------------------------------|------------------------------------------------------------------------------------------------------------------------------------------------------------------------------------------------------------------------------------------------------------------------------------------------------------------------------------------------------------------------------------------------------------------------------------------------------------------------------------------------------------------------------------------------------------------------------------------------------------------|----------------------------------------------------------------------------------|
| <p style="text-align: center;">Yes                      No</p> <p style="text-align: center;"> <input style="width: 50px; height: 20px;" type="text"/>                                <input style="width: 50px; height: 20px; border: 1px solid black;" type="text" value="NA"/> </p> <p style="text-align: center;"> <b>Number of days/week</b>                                <i>go to 82.2</i> </p> <p style="text-align: center;">↓</p> <p>Hours <input style="width: 50px; height: 20px;" type="text"/></p> <p>min <input style="width: 50px; height: 20px;" type="text"/></p> <p><b>How much time</b></p> | <p><b>82.1a</b></p> <p><b>82.1b</b></p> <p><b>82.1c</b></p> <p><b>82.1d</b></p> | <p style="text-align: center;">Yes                      No</p> <p style="text-align: center;"> <input style="width: 50px; height: 20px;" type="text"/>                                <input style="width: 50px; height: 20px; border: 1px solid black;" type="text" value="NA"/> </p> <p style="text-align: center;"> <b>Number of days/week</b>                                <i>go to 83.1</i> </p> <p style="text-align: center;">↓</p> <p>Hours <input style="width: 50px; height: 20px;" type="text"/></p> <p>min <input style="width: 50px; height: 20px;" type="text"/></p> <p><b>How much time</b></p> | <p><b>82.2.a</b></p> <p><b>82.2b</b></p> <p><b>82.2c</b></p> <p><b>82.2d</b></p> |

83. Mother's moderate intensity activities (for at least 10 minutes at time)

| <b>83.1 Work</b><br>(brisk walking or carrying light loads, housework)                                                                                                                                                                                                                                                                                                                                                                                                                                                                                                                                           | <b>Code</b>                                                                     | <b>83.2 Leisure time</b><br>(brisk walking, cycling)                                                                                                                                                                                                                                                                                                                                                                                                                                                                                                                                                             | <b>Code</b>                                                                      |
|------------------------------------------------------------------------------------------------------------------------------------------------------------------------------------------------------------------------------------------------------------------------------------------------------------------------------------------------------------------------------------------------------------------------------------------------------------------------------------------------------------------------------------------------------------------------------------------------------------------|---------------------------------------------------------------------------------|------------------------------------------------------------------------------------------------------------------------------------------------------------------------------------------------------------------------------------------------------------------------------------------------------------------------------------------------------------------------------------------------------------------------------------------------------------------------------------------------------------------------------------------------------------------------------------------------------------------|----------------------------------------------------------------------------------|
| <p style="text-align: center;">Yes                      No</p> <p style="text-align: center;"> <input style="width: 50px; height: 20px;" type="text"/>                                <input style="width: 50px; height: 20px; border: 1px solid black;" type="text" value="NA"/> </p> <p style="text-align: center;"> <b>Number of days/week</b>                                <i>go to 82.2</i> </p> <p style="text-align: center;">↓</p> <p>Hours <input style="width: 50px; height: 20px;" type="text"/></p> <p>min <input style="width: 50px; height: 20px;" type="text"/></p> <p><b>How much time</b></p> | <p><b>83.1a</b></p> <p><b>83.1b</b></p> <p><b>83.1c</b></p> <p><b>83.1d</b></p> | <p style="text-align: center;">Yes                      No</p> <p style="text-align: center;"> <input style="width: 50px; height: 20px;" type="text"/>                                <input style="width: 50px; height: 20px; border: 1px solid black;" type="text" value="NA"/> </p> <p style="text-align: center;"> <b>Number of days/week</b>                                <i>go to 83.1</i> </p> <p style="text-align: center;">↓</p> <p>Hours <input style="width: 50px; height: 20px;" type="text"/></p> <p>min <input style="width: 50px; height: 20px;" type="text"/></p> <p><b>How much time</b></p> | <p><b>83.2.a</b></p> <p><b>83.2b</b></p> <p><b>83.2c</b></p> <p><b>83.2d</b></p> |

| SN | Question | Answer | Code |
|----|----------|--------|------|
|----|----------|--------|------|

|    |                                                                                                                                                                                |                                                                                                                                                                                              |                          |
|----|--------------------------------------------------------------------------------------------------------------------------------------------------------------------------------|----------------------------------------------------------------------------------------------------------------------------------------------------------------------------------------------|--------------------------|
| 84 | How much time you usually spend sitting or reclining on typical day?                                                                                                           | _____ hours/day                                                                                                                                                                              |                          |
| 85 | Does your child attend school?                                                                                                                                                 | 1. Yes<br>2. No ( <i>go to Q. 88</i> )                                                                                                                                                       |                          |
| 86 | How does your child usually get to school?                                                                                                                                     | 1. Walking<br>2. School bus<br>3. Car, motorbike<br>4. Cycling<br>5. Others (specify) _____<br>6. Don't know                                                                                 | <input type="checkbox"/> |
| 87 | How long does your child walk (including walking to and from the bus stop) for going to and coming back from the school?                                                       | _____ min/day                                                                                                                                                                                |                          |
| 88 | How does your child like to spend spare time (after homework is done or on the vacation)?<br><br><b>(Multiple answer question)</b>                                             | 1. Read books<br>2. Playing alone at home<br>3. Playing with friends at home<br>4. Playing outside<br>5. Watching TV, computer or mobile games<br>6. Others (specify) _____<br>7. Don't know | <input type="checkbox"/> |
| 89 | How much time does your child usually spend per day doing homework?                                                                                                            | _____ min/day                                                                                                                                                                                |                          |
| 90 | How much time does your child usually spend per day playing in the yard or street around your house (or the house of a friend, neighbour or relative) on the typical weekdays? | _____ min/day                                                                                                                                                                                |                          |

|    |                                                                                                                                                                                    |               |  |
|----|------------------------------------------------------------------------------------------------------------------------------------------------------------------------------------|---------------|--|
| 91 | How much time does your child usually spend per day playing in the yard or street around your house (or the house of a friend, neighbour or relative) on the weekends or holidays? | _____ min/day |  |
| 92 | How much time does your child spend using computers, mobile games, TV per day on weekdays?                                                                                         | _____ min/day |  |
| 93 | How much time does your child spend using computers, mobile games, TV on weekends or holidays?                                                                                     | _____ min/day |  |

**THANK YOU**
