# Supplementary material for: Knowledge, attitude and practice on diet and physical activity among mothers with young children in the Jhaukhel-Duwakot Health Demographic Surveillance Site, Nepal
Source: PubMed Central journal article supplement (PMC6037384; doi:10.1371/journal.pone.0200329), 2018-07-09
Supplement: pone.0200329.s003.pdf [file pone.0200329.s003.pdf]

**Baseline assessment of Knowledge, Attitude and Behaviour about Diet and Physical**

**Activity among mothers in a semi-urban community of Nepal**

स्वस्थ खानपान तथा शारीरिक क्रियाकलाप बारेआमाहरुमा सर्वेक्षण

**QUESTIONNAIRE (BASELINE SURVEY) प्रारम्भिक सर्वेक्षण प्रश्नावली**

अन्तरवार्ता लिनेको कोड नं. : .....

अन्तरवार्ता शुरु गरेको समय: .....

अन्तरवार्ता अन्त्य भएको समय : .....

अन्तरवार्ताकार

फिल्ड सुपरभाइजर

तथ्याङ्क भर्ने

मिति:.....

मिति:.....

मिति:.....

**I. सूचना फारम सम्बन्धि तथा आधारभूत विवरण जानकारी**

| क्र.सं.              | विवरण                                                                                                                                                    | कोड                                                                                                                          |                      |                      |                  |    |  |  |  |  |
|----------------------|----------------------------------------------------------------------------------------------------------------------------------------------------------|------------------------------------------------------------------------------------------------------------------------------|----------------------|----------------------|------------------|----|--|--|--|--|
| 1.                   | उत्तरदाता (सहभागी) क्रम संख्या                                                                                                                           | G1                                                                                                                           |                      |                      |                  |    |  |  |  |  |
|                      | <table border="1"> <tr> <td>VDC</td> <td>Ward</td> <td>House no.</td> <td>E. Code</td> </tr> <tr> <td></td> <td></td> <td></td> <td></td> </tr> </table> | VDC                                                                                                                          | Ward                 | House no.            | E. Code          |    |  |  |  |  |
| VDC                  | Ward                                                                                                                                                     | House no.                                                                                                                    | E. Code              |                      |                  |    |  |  |  |  |
|                      |                                                                                                                                                          |                                                                                                                              |                      |                      |                  |    |  |  |  |  |
| 2.                   | गाउँ वा टोलको नाम                                                                                                                                        | G2                                                                                                                           |                      |                      |                  |    |  |  |  |  |
| 3.                   | चिठ्ठा प्रणालीबाट छानिएको उत्तरदाता                                                                                                                      | G3                                                                                                                           |                      |                      |                  |    |  |  |  |  |
|                      | <table border="1"> <tr> <td>हो</td> <td>होइन</td> </tr> <tr> <td></td> <td></td> </tr> </table>                                                          | हो                                                                                                                           | होइन                 |                      |                  |    |  |  |  |  |
| हो                   | होइन                                                                                                                                                     |                                                                                                                              |                      |                      |                  |    |  |  |  |  |
|                      |                                                                                                                                                          |                                                                                                                              |                      |                      |                  |    |  |  |  |  |
| 4.                   | घरको नक्सा                                                                                                                                               | G4                                                                                                                           |                      |                      |                  |    |  |  |  |  |
| 6.                   | फोन नं. : .....                                                                                                                                          | G5                                                                                                                           |                      |                      |                  |    |  |  |  |  |
| 7.                   | घरमुलीको नाम : .....                                                                                                                                     | G6                                                                                                                           |                      |                      |                  |    |  |  |  |  |
| 8.                   | श्रीमान् (पति)को नाम : .....                                                                                                                             | G7                                                                                                                           |                      |                      |                  |    |  |  |  |  |
| 9.                   | यस घरधुरीमा जम्मा कति जना मानिसहरु (वयस्क र बालबालिका समेत) बस्दछन् ? (६ महिना वा सोभन्दा बढी बसेको हुनुपर्छ)                                            | <table border="1"> <tr> <td><input type="text"/></td> <td><input type="text"/></td> <td>जना</td> </tr> </table>              | <input type="text"/> | <input type="text"/> | जना              | G8 |  |  |  |  |
| <input type="text"/> | <input type="text"/>                                                                                                                                     | जना                                                                                                                          |                      |                      |                  |    |  |  |  |  |
| 10.                  | यस घरधुरीमा कति जना १५ वर्ष मुनिका बालबालिकाहरु (सहभागी उत्तरदाता बालबालिका समेत) बस्दछन् ?                                                              | <table border="1"> <tr> <td><input type="text"/></td> <td><input type="text"/></td> <td>जना बालबालिकाहरु</td> </tr> </table> | <input type="text"/> | <input type="text"/> | जना बालबालिकाहरु | G9 |  |  |  |  |
| <input type="text"/> | <input type="text"/>                                                                                                                                     | जना बालबालिकाहरु                                                                                                             |                      |                      |                  |    |  |  |  |  |

## आधिकारिक मञ्जुरीनामा (प्रथम चरण)

नमस्कार,

मेरो नाम ..... हो र म स्वास्थ्य तथा जनसांख्यिक सर्वेक्षण क्षेत्र परियोजना (JD-HDSS Project) काठमाडौं मेडिकल कलेजको तर्फबाट यहाँ आएको हुँ । यो परियोजना भक्तपुर जिल्लाको दुई गा.वि.स.हरु दुवाकोट र भौखेलमा सञ्चालित छ । यसै परियोजना अन्तर्गत “ **स्वस्थ खानपान तथा शारीरिक क्रियाकलाप बारे आमाहरुमा सर्वेक्षण** ” अध्ययनको सिलसिलामा हामीले यस जिल्लाको दुई गाविसहरुमा आधारभूत सर्भेक्षण गर्न लागेका छौं । यस सर्वेक्षणको मुख्य उद्देश्य भनेको खानपान र शारीरिक क्रियाकलाप वा अभ्यास प्रति तपाईंको ज्ञान, अवधारणा तथा व्यवहार मापन गर्नुका साथै तपाईंसँग भएको ज्ञान वा सिप कसरी आफ्नो बालबालिकाहरुका लागि प्रयोग गरिरहनु भएको छ त्यो पनि हेर्नु हो । यस सर्वेक्षण अन्तर्गत हामी तपाईंको र तपाईंको बच्चाहरुको उचाइ र तौल समेत लिनेछौं ।

यस सर्भेक्षणमा तपाईंको सहभागिताले स्वास्थ्य सम्बन्धी जनचेतना जगाउन तथा रोगहरुको रोकथाम गर्न मद्दत मिल्नेछ । हामी तपाईंलाई यस सर्भेक्षणमा भएका प्रश्नहरु सोध्न चाहन्छौं जुन करीब ४० मिनेट समय लाग्नेछ ।

यस सर्भेक्षणको सिलसिलामा म तपाईंको र तपाईंको बच्चाहरुको बारेमा प्रश्नहरु सोध्नेछु । तपाईंले दिनु भएको सूचनाहरु वा जानकारीले कसैलाई हानी गर्ने छैन साथै तपाईंको नाम र यी जानकारीहरुलाई अति गोप्य राखिनेछ , कसैलाई भनिने छैन । यो सर्भेक्षणमा भाग लिने वा नलिने तपाईंको पूर्ण मन्जुरीको आधारमा हुनेछ । यदि तपाईंलाई सोधेको प्रश्नको उत्तर दिन नचाहेमा मलाई भन्नु होला, र म तपाईंलाई अर्को प्रश्न सोध्नेछु वा तपाईंले चाहेको बेलामा यो अन्तरवार्ता अन्त्य गर्न सक्नुहुनेछ । यस सर्भेक्षणमा तपाईंको विचार निकै महत्वपूर्ण छ र मलाई आशा छ तपाईंले अवश्य सहयोग गर्नुहुनेछ । तपाईंलाई यस सर्वेक्षण सम्बन्धी केही जिज्ञाशा भए सोध्न सक्नुहुनेछ ।

यदि तपाईंको केही जिज्ञाशा छैन भने, के तपाईं यस अन्तरवार्तामा सहभागी हुन मञ्जुर हुनुहुन्छ ?

|       |  |        |  |
|-------|--|--------|--|
| हुन्छ |  | हुँदैन |  |
|-------|--|--------|--|

के तपाईं यस मञ्जुरीनामा सही गर्नुहुन्छ ?

|                  |            |
|------------------|------------|
| हुन्छ, सही गर्छु | सही गर्दैन |
|------------------|------------|

(यदि सहभागीले सही नगरे पनि फेरि सोध्नुहोस्) के तपाईं यस अन्तरवार्तामा सहभागी हुन मञ्जुर हुनुहुन्छ ? के म अब तपाईंलाई प्रश्नहरु सोध्न सक्छु ? (मौखिक मञ्जुरी लिनुहोस्)

|        |              |
|--------|--------------|
| हुन्छ  | साक्षीको सही |
| हुँदैन |              |

(यदि अन्तरवार्तामा सहभागी नहुने भएमा पनि वहाँको समयको लागि सहभागीलाई धन्यवाद दिनुहोस्)

**तपाईंलाई धन्यवाद छ ।**

### सर्भेक्षण फारमको नतिजा

|                                                                                                                                                                                                                                                                   |                                                                                         |
|-------------------------------------------------------------------------------------------------------------------------------------------------------------------------------------------------------------------------------------------------------------------|-----------------------------------------------------------------------------------------|
| <p><b>नतिजा</b></p> <ol style="list-style-type: none"> <li>1. पूर्णरूपमा फारम पूरा भएको</li> <li>2. केही उत्तर बाहेक फारम पूरा भएको</li> <li>3. लामो समयदेखि घरमा नभएको</li> <li>4. फारम भर्न अस्विकार गरेको</li> <li>5. अन्य भए उल्लेख गर्नुहोस्.....</li> </ol> | <div style="border: 1px solid black; width: 50px; height: 50px; margin: 0 auto;"></div> |
|-------------------------------------------------------------------------------------------------------------------------------------------------------------------------------------------------------------------------------------------------------------------|-----------------------------------------------------------------------------------------|

## II. जनसांखिक विवरण

### A. सहभागी उत्तरदाता (आमा) सम्बन्धी विवरण

अब म तपाईंलाई तपाईंके बारेमा केही प्रश्नहरु सोध्नेछु ।

| क्र.सं. | प्रश्नहरु                                                                                                                     | उत्तर                                                                                                                                                                                                                                                                                                                                                                                                                                                                                                                                               | कोड |
|---------|-------------------------------------------------------------------------------------------------------------------------------|-----------------------------------------------------------------------------------------------------------------------------------------------------------------------------------------------------------------------------------------------------------------------------------------------------------------------------------------------------------------------------------------------------------------------------------------------------------------------------------------------------------------------------------------------------|-----|
| 11.     | तपाईंको पुरा नाम के हो ?<br>सहभागी (उत्तरदाता)को नाम :                                                                        |                                                                                                                                                                                                                                                                                                                                                                                                                                                                                                                                                     | D1  |
| 12.     | तपाईंको जन्म कति सालमा भएको हो?<br>(यदि उत्तरदाताले वर्षमा उत्तर दिन्छ भने<br>वर्षलाई २०७१ मा घटाएर जन्मेको साल<br>लेख्नुहोस) | वि.स..... साल                                                                                                                                                                                                                                                                                                                                                                                                                                                                                                                                       | D2  |
| 13.     | घरमुलीसँग सहभागी (उत्तरदाता) को<br>नाता                                                                                       | <ol style="list-style-type: none"> <li>1. आफै घरमुली</li> <li>2. घरमुलीको श्रीमती वा पत्नी</li> <li>3. घरमुलीको बुहारी</li> <li>4. घरमुलीको सासू</li> <li>5. घरमुलीको आमा</li> <li>6. अन्य (उल्लेख गर्ने) _____</li> </ol> <input type="checkbox"/>                                                                                                                                                                                                                                                                                                 | D3  |
| 14.     | तपाईं कुन धर्म मान्नुहुन्छ ?                                                                                                  | <ol style="list-style-type: none"> <li>1. हिन्दू</li> <li>2. बौद्ध</li> <li>3. इशाई</li> <li>4. इस्लाम</li> <li>5. अन्य (उल्लेख गर्ने) _____</li> </ol> <input type="checkbox"/>                                                                                                                                                                                                                                                                                                                                                                    | D4  |
| 15.     | तपाईंको जाती के हो ? वा तपाईं कुन<br>जातीको हो ?                                                                              | <ol style="list-style-type: none"> <li>1. नेवार</li> <li>2. पहाडी ब्राम्हण</li> <li>3. छेत्री</li> <li>4. तामाङ्ग</li> <li>5. दलित</li> <li>6. ठकुरी</li> <li>7. मगर</li> <li>8. राई</li> <li>9. अन्य (उल्लेख गर्ने) _____</li> </ol> <input type="checkbox"/>                                                                                                                                                                                                                                                                                      | D5  |
| 16.     | तपाईंले कति (कक्षा)सम्म पढ्नुभएको<br>छ?                                                                                       | <ol style="list-style-type: none"> <li>1. लेख्न पढ्न नसक्ने</li> <li>2. लेखपढ गर्न सक्ने तर विद्यालय नगएको</li> <li>3. विद्यालय गएको तर प्राथमिक तह (कक्षा ५)<br/>पुरा नगरेको</li> <li>4. प्राथमिक तह (कक्षा ५) पुरा गरेको</li> <li>5. माध्यमिक तह (कक्षा १०) पुरा गरेको</li> <li>6. प्रमाणपत्र तह (कक्षा १२) पुरा गरेको</li> <li>7. स्नातक तह (बि.ए. सरह) पुरा गरेको</li> <li>8. स्नातकोत्तर तह (एम.ए. सरह) पुरा गरेको</li> <li>9. विद्यावारिधी तह (पीएच.डी) पुरा गरेको</li> <li>10. अन्य (उल्लेख गर्ने) _____</li> </ol> <input type="checkbox"/> | D6  |
| 17.     | तपाईंको पेशा के हो ? वा तपाईं आय<br>आर्जन हुने के काम गर्नुहुन्छ?                                                             | <ol style="list-style-type: none"> <li>1. कृषि</li> <li>2. सरकारी जागिर</li> <li>3. श्रम गरेर खाने वा ज्यालादारी</li> <li>4. विद्यार्थी</li> <li>5. आफ्नै व्यवसाय</li> <li>6. गृहिणी</li> <li>7. निजी संस्थामा जागिरे</li> <li>8. अन्य (उल्लेख गर्ने) _____</li> </ol> <input type="checkbox"/>                                                                                                                                                                                                                                                     | D7  |

|     |                                                                              |                                                                                                                                                                                                                                |                                 |
|-----|------------------------------------------------------------------------------|--------------------------------------------------------------------------------------------------------------------------------------------------------------------------------------------------------------------------------|---------------------------------|
| 18. | के तपाईं अहिले कुतै काम गर्नुहुन्छ ?<br>(गर्छु वा गर्दिन मा घेरा लगाउनुहोस्) | 1. गर्छु<br>i. यदि काम गर्नुहुन्छ भने दैनिक कति समय घरबाहिर रहनुहुन्छ (छुट्टीका दिन बाहेक)?<br>..... घण्टा ।<br>2. गर्दिन                                                                                                      | D8<br>D8i                       |
| 19. | तपाईंको वैवाहिक अवस्था के हो?                                                | 1. विवाहित<br>2. श्रीमानसँग छुट्टिएर बसेको<br>3. पारपाचुके गरेको<br>4. विधवा<br>5. अविवाहित                                                                                                                                    | <input type="checkbox"/><br>D9  |
| 20. | तपाईंको कस्तो प्रकारको परिवार हो?                                            | 1. एकल (सानो) परिवार<br>2. बृहत (ठुलो) परिवार                                                                                                                                                                                  | <input type="checkbox"/><br>D10 |
| 21. | गएको वर्षको आधारमा भन्नु पर्दा तपाईंको घरको मासिक आम्दानी कति थियो होला ?    | _____ नेपाली रुपैया प्रति महिना                                                                                                                                                                                                | D11                             |
| 22. | तपाईंको श्रीमान् वा पतिको मुख्य पेशा (आम्दानीको श्रोत) के हो ?               | 1. कृषि<br>2. सरकारी जागिर<br>3. श्रम गरेर खाने वा ज्यालादारी<br>4. विद्यार्थी<br>5. आफ्नै व्यवसाय<br>6. निजी संस्थामा जागिरे<br>7. सेवा निवृत्त (उमेर पुगी जागिर सकिएको)<br>8. वैदेशिक रोजगार<br>9. अन्य (उल्लेख गर्ने) _____ | <input type="checkbox"/><br>D12 |

### B. बालबालिकासम्बन्धी विवरण वा जानकारी

अब म तपाईंलाई तपाईंका बालबालिकाहरु (बच्चाहरु)को बारेमा केही प्रश्नहरु सोध्नेछु ।

यदि सहभागी (उत्तरदाता)को एकभन्दा बढी १ देखि ७ वर्षका बालबालिका छन् भने प्रत्येकलाई ठूलो देखी सानो हुदै क्रमै सगं १, २, ३ मा राख्ने। यदि एउटा मात्र बच्चा भए बच्चा १ मात्र लेख्ने ।

| क्र.सं. | प्रश्नहरु                                                                                    | उत्तर                                                                                                                                                                                                                                                                                                                                                          | कोड                                                                                                                              |
|---------|----------------------------------------------------------------------------------------------|----------------------------------------------------------------------------------------------------------------------------------------------------------------------------------------------------------------------------------------------------------------------------------------------------------------------------------------------------------------|----------------------------------------------------------------------------------------------------------------------------------|
| 23.     | तपाईंका १ देखि ७ वर्ष उमेरका कति जना बालबच्चाहरु छन् ?(संख्या अर्को कोठाको बाकसभित्र लेख्ने) | <input type="checkbox"/> जना                                                                                                                                                                                                                                                                                                                                   | Dc1                                                                                                                              |
| 24.     | बालबालिकाहरुको विवरण<br>(उमेर १ देखि ७ वर्ष)                                                 | <b>बच्चा १</b><br>1. नाम : _____<br>2. जन्म साल र महिना _____<br>3. लिङ्ग : _____<br>4. उतिर्ण गरेको कक्षा : _____<br><b>बच्चा २</b><br>1. नाम : _____<br>2. जन्म साल र महिना _____<br>3. लिङ्ग : _____<br>4. उतिर्ण गरेको कक्षा : _____<br><b>बच्चा ३</b><br>1. नाम : _____<br>2. जन्म साल र महिना _____<br>3. लिङ्ग : _____<br>4. उतिर्ण गरेको कक्षा : _____ | Dc2.1.1<br>Dc2.1.2<br>Dc2.1.3<br>Dc2.1.4<br>Dc2.2.1<br>Dc2.2.2<br>Dc2.2.3<br>Dc2.2.4<br>Dc2.3.1<br>Dc2.3.2<br>Dc2.3.3<br>Dc2.3.4 |

|     |                                                                                                                                                                                                                 |                                                                                                                                                                                                                                                                               |                                                                                |
|-----|-----------------------------------------------------------------------------------------------------------------------------------------------------------------------------------------------------------------|-------------------------------------------------------------------------------------------------------------------------------------------------------------------------------------------------------------------------------------------------------------------------------|--------------------------------------------------------------------------------|
| 25. | <p>तपाईंको बालबच्चाको हेरचाह धेरैजसो कसले गर्छ ?</p> <p>(दायाँतिर भएका उत्तरहरू तुरुन्तै नभन्नुस्। प्रश्न सोधेपछि केही समय पर्खनुस् । यदि सहभागीलाई उत्तर भन्न गाह्रो भएमा मात्र उक्त उत्तरहरू पढ्नुहोला ।)</p> | <ol style="list-style-type: none"> <li>1. आफैले</li> <li>2. श्रीमान (पति)ले</li> <li>3. आमाले/ सासुले</li> <li>4. बुवाले/ ससुराले</li> <li>5. हजुरबा हजुरआमाले</li> <li>6. अन्य नातेदारले</li> <li>7. बच्चा हेर्ने व्यक्तिले</li> <li>8. अन्य (उल्लेख गर्ने) _____</li> </ol> | <div style="text-align: center;">□</div> <p style="text-align: right;">Dc3</p> |
|-----|-----------------------------------------------------------------------------------------------------------------------------------------------------------------------------------------------------------------|-------------------------------------------------------------------------------------------------------------------------------------------------------------------------------------------------------------------------------------------------------------------------------|--------------------------------------------------------------------------------|

### III. आमाको ज्ञान (चेतना) सम्बन्धी विवरण

#### A. खानपान

**अब म तपाईंलाई खानपान सम्बन्धी तपाईंको ज्ञान वा चेतना केकस्तो छ भनी सोध्नेछु ।**

| क्र.सं.                                            | प्रश्नहरू                                                                                                                                                                                                                                                                                                                                              | उत्तर                                                                                                                                                                                                                                                                                                                                                                                                                                                                                                                                                                                                                                                                                                                                                                                                                                                                                                                                                                                                                             |        | कोड   |                                   |  |                   |  |                        |  |                                      |  |                                                    |  |                      |  |                             |  |                                               |  |                                                 |  |                                            |  |                          |                                                                                                                                    |                      |  |          |  |                     |  |                   |  |                 |  |            |  |                                                   |  |  |                                                                                                                                                                                                                                                    |
|----------------------------------------------------|--------------------------------------------------------------------------------------------------------------------------------------------------------------------------------------------------------------------------------------------------------------------------------------------------------------------------------------------------------|-----------------------------------------------------------------------------------------------------------------------------------------------------------------------------------------------------------------------------------------------------------------------------------------------------------------------------------------------------------------------------------------------------------------------------------------------------------------------------------------------------------------------------------------------------------------------------------------------------------------------------------------------------------------------------------------------------------------------------------------------------------------------------------------------------------------------------------------------------------------------------------------------------------------------------------------------------------------------------------------------------------------------------------|--------|-------|-----------------------------------|--|-------------------|--|------------------------|--|--------------------------------------|--|----------------------------------------------------|--|----------------------|--|-----------------------------|--|-----------------------------------------------|--|-------------------------------------------------|--|--------------------------------------------|--|--------------------------|------------------------------------------------------------------------------------------------------------------------------------|----------------------|--|----------|--|---------------------|--|-------------------|--|-----------------|--|------------|--|---------------------------------------------------|--|--|----------------------------------------------------------------------------------------------------------------------------------------------------------------------------------------------------------------------------------------------------|
| 26.                                                | <p>तपाईंको विचारमा स्वस्थ खानपान (को बानी) भन्नाले के बुझ्नुहुन्छ ? वा कस्तो बानीलाई तपाईं स्वस्थ खानपानको बानी भन्नुहुन्छ ?</p> <p>(दायाँतिर भएका प्रत्येक उत्तर पढेर सुनाउनुहोस् र प्रत्येकमा हो वा होइन भनी सोध्नुहोस् । उत्तरदाताबाट आएको उत्तरलाई सँगैको बाकसभित्र हो भने "1" तथा होइन भने "0" र थाहा छैन भने "99"लेख्नुहोस् ।)</p>               | <table border="1"> <thead> <tr> <th>प्रश्न</th> <th>उत्तर</th> </tr> </thead> <tbody> <tr><td>1. धेरै खाना</td><td></td></tr> <tr><td>2. धेरै ताजा खाना</td><td></td></tr> <tr><td>3. धेरै प्रकारका खाना</td><td></td></tr> <tr><td>4. जति मात्रामा भए पनि सफा खाना खाने</td><td></td></tr> <tr><td>5. साँझ विहान राम्ररी खानाखाने बीचबीचमा खाजा नखाने</td><td></td></tr> <tr><td>6. चिनी कम भएको खाना</td><td></td></tr> <tr><td>7. धेरै तरकारी (सब्जी) खाने</td><td></td></tr> <tr><td>8. थोरै मात्रामा तर बारम्बार (घरिघरि) खाइरहने</td><td></td></tr> <tr><td>9. पकाउँदा चिल्लो जस्तै तेल कम हाल्ने</td><td></td></tr> <tr><td>10. प्रसस्त फलफुल तथा फलफुलको ताजा रस खाने</td><td></td></tr> </tbody> </table>                                                                                                                                                                                                                                                                                                                | प्रश्न | उत्तर | 1. धेरै खाना                      |  | 2. धेरै ताजा खाना |  | 3. धेरै प्रकारका खाना  |  | 4. जति मात्रामा भए पनि सफा खाना खाने |  | 5. साँझ विहान राम्ररी खानाखाने बीचबीचमा खाजा नखाने |  | 6. चिनी कम भएको खाना |  | 7. धेरै तरकारी (सब्जी) खाने |  | 8. थोरै मात्रामा तर बारम्बार (घरिघरि) खाइरहने |  | 9. पकाउँदा चिल्लो जस्तै तेल कम हाल्ने           |  | 10. प्रसस्त फलफुल तथा फलफुलको ताजा रस खाने |  |                          | <p>Kd1.1</p> <p>Kd1.2</p> <p>Kd1.3</p> <p>Kd1.4</p> <p>Kd1.5</p> <p>Kd1.6</p> <p>Kd1.7</p> <p>Kd1.8</p> <p>Kd1.9</p> <p>Kd1.10</p> |                      |  |          |  |                     |  |                   |  |                 |  |            |  |                                                   |  |  |                                                                                                                                                                                                                                                    |
| प्रश्न                                             | उत्तर                                                                                                                                                                                                                                                                                                                                                  |                                                                                                                                                                                                                                                                                                                                                                                                                                                                                                                                                                                                                                                                                                                                                                                                                                                                                                                                                                                                                                   |        |       |                                   |  |                   |  |                        |  |                                      |  |                                                    |  |                      |  |                             |  |                                               |  |                                                 |  |                                            |  |                          |                                                                                                                                    |                      |  |          |  |                     |  |                   |  |                 |  |            |  |                                                   |  |  |                                                                                                                                                                                                                                                    |
| 1. धेरै खाना                                       |                                                                                                                                                                                                                                                                                                                                                        |                                                                                                                                                                                                                                                                                                                                                                                                                                                                                                                                                                                                                                                                                                                                                                                                                                                                                                                                                                                                                                   |        |       |                                   |  |                   |  |                        |  |                                      |  |                                                    |  |                      |  |                             |  |                                               |  |                                                 |  |                                            |  |                          |                                                                                                                                    |                      |  |          |  |                     |  |                   |  |                 |  |            |  |                                                   |  |  |                                                                                                                                                                                                                                                    |
| 2. धेरै ताजा खाना                                  |                                                                                                                                                                                                                                                                                                                                                        |                                                                                                                                                                                                                                                                                                                                                                                                                                                                                                                                                                                                                                                                                                                                                                                                                                                                                                                                                                                                                                   |        |       |                                   |  |                   |  |                        |  |                                      |  |                                                    |  |                      |  |                             |  |                                               |  |                                                 |  |                                            |  |                          |                                                                                                                                    |                      |  |          |  |                     |  |                   |  |                 |  |            |  |                                                   |  |  |                                                                                                                                                                                                                                                    |
| 3. धेरै प्रकारका खाना                              |                                                                                                                                                                                                                                                                                                                                                        |                                                                                                                                                                                                                                                                                                                                                                                                                                                                                                                                                                                                                                                                                                                                                                                                                                                                                                                                                                                                                                   |        |       |                                   |  |                   |  |                        |  |                                      |  |                                                    |  |                      |  |                             |  |                                               |  |                                                 |  |                                            |  |                          |                                                                                                                                    |                      |  |          |  |                     |  |                   |  |                 |  |            |  |                                                   |  |  |                                                                                                                                                                                                                                                    |
| 4. जति मात्रामा भए पनि सफा खाना खाने               |                                                                                                                                                                                                                                                                                                                                                        |                                                                                                                                                                                                                                                                                                                                                                                                                                                                                                                                                                                                                                                                                                                                                                                                                                                                                                                                                                                                                                   |        |       |                                   |  |                   |  |                        |  |                                      |  |                                                    |  |                      |  |                             |  |                                               |  |                                                 |  |                                            |  |                          |                                                                                                                                    |                      |  |          |  |                     |  |                   |  |                 |  |            |  |                                                   |  |  |                                                                                                                                                                                                                                                    |
| 5. साँझ विहान राम्ररी खानाखाने बीचबीचमा खाजा नखाने |                                                                                                                                                                                                                                                                                                                                                        |                                                                                                                                                                                                                                                                                                                                                                                                                                                                                                                                                                                                                                                                                                                                                                                                                                                                                                                                                                                                                                   |        |       |                                   |  |                   |  |                        |  |                                      |  |                                                    |  |                      |  |                             |  |                                               |  |                                                 |  |                                            |  |                          |                                                                                                                                    |                      |  |          |  |                     |  |                   |  |                 |  |            |  |                                                   |  |  |                                                                                                                                                                                                                                                    |
| 6. चिनी कम भएको खाना                               |                                                                                                                                                                                                                                                                                                                                                        |                                                                                                                                                                                                                                                                                                                                                                                                                                                                                                                                                                                                                                                                                                                                                                                                                                                                                                                                                                                                                                   |        |       |                                   |  |                   |  |                        |  |                                      |  |                                                    |  |                      |  |                             |  |                                               |  |                                                 |  |                                            |  |                          |                                                                                                                                    |                      |  |          |  |                     |  |                   |  |                 |  |            |  |                                                   |  |  |                                                                                                                                                                                                                                                    |
| 7. धेरै तरकारी (सब्जी) खाने                        |                                                                                                                                                                                                                                                                                                                                                        |                                                                                                                                                                                                                                                                                                                                                                                                                                                                                                                                                                                                                                                                                                                                                                                                                                                                                                                                                                                                                                   |        |       |                                   |  |                   |  |                        |  |                                      |  |                                                    |  |                      |  |                             |  |                                               |  |                                                 |  |                                            |  |                          |                                                                                                                                    |                      |  |          |  |                     |  |                   |  |                 |  |            |  |                                                   |  |  |                                                                                                                                                                                                                                                    |
| 8. थोरै मात्रामा तर बारम्बार (घरिघरि) खाइरहने      |                                                                                                                                                                                                                                                                                                                                                        |                                                                                                                                                                                                                                                                                                                                                                                                                                                                                                                                                                                                                                                                                                                                                                                                                                                                                                                                                                                                                                   |        |       |                                   |  |                   |  |                        |  |                                      |  |                                                    |  |                      |  |                             |  |                                               |  |                                                 |  |                                            |  |                          |                                                                                                                                    |                      |  |          |  |                     |  |                   |  |                 |  |            |  |                                                   |  |  |                                                                                                                                                                                                                                                    |
| 9. पकाउँदा चिल्लो जस्तै तेल कम हाल्ने              |                                                                                                                                                                                                                                                                                                                                                        |                                                                                                                                                                                                                                                                                                                                                                                                                                                                                                                                                                                                                                                                                                                                                                                                                                                                                                                                                                                                                                   |        |       |                                   |  |                   |  |                        |  |                                      |  |                                                    |  |                      |  |                             |  |                                               |  |                                                 |  |                                            |  |                          |                                                                                                                                    |                      |  |          |  |                     |  |                   |  |                 |  |            |  |                                                   |  |  |                                                                                                                                                                                                                                                    |
| 10. प्रसस्त फलफुल तथा फलफुलको ताजा रस खाने         |                                                                                                                                                                                                                                                                                                                                                        |                                                                                                                                                                                                                                                                                                                                                                                                                                                                                                                                                                                                                                                                                                                                                                                                                                                                                                                                                                                                                                   |        |       |                                   |  |                   |  |                        |  |                                      |  |                                                    |  |                      |  |                             |  |                                               |  |                                                 |  |                                            |  |                          |                                                                                                                                    |                      |  |          |  |                     |  |                   |  |                 |  |            |  |                                                   |  |  |                                                                                                                                                                                                                                                    |
| 27.                                                | <p>तपाईंलाई अब म केही खानेकुराहरूको नाम पढेर सुनाउनेछु । अब, तपाईंले भन्नुहोस् कि यी खानेकुरा स्वस्थकर छ कि स्वस्थकर छैन?</p> <p>(दायाँतिर भएका प्रत्येक खानेकुरा पढेर सुनाउनुहोस् र प्रत्येकमा स्वस्थकर छ वा छैन भनी सोध्नुहोस् । उत्तरदाताबाट आएको उत्तरलाई सँगैको बाकसभित्र स्वस्थकर छ भने "1" तथा छैन भने "0" र थाहा छैन भने "99"लेख्नुहोस् ।)</p> | <table border="1"> <thead> <tr> <th>प्रश्न</th> <th>उत्तर</th> </tr> </thead> <tbody> <tr><td>1. सलाद (गाजर, मुला, काँक्रा आदि)</td><td></td></tr> <tr><td>2. तारेको तरकारी</td><td></td></tr> <tr><td>3. ससेज, पीज्जा, बर्गर</td><td></td></tr> <tr><td>4. गुलियो पेय पदार्थ जस्तै कोकाकोला</td><td></td></tr> <tr><td>5. फलफुल</td><td></td></tr> <tr><td>6. डोनट, बिस्कुटआदि</td><td></td></tr> <tr><td>7. चकलेट</td><td></td></tr> <tr><td>8. मिठाई (लड्डु, पेडा, बर्फी)</td><td></td></tr> <tr><td>9. पारम्पारिक नेपालीरोटी(सेलरोटी, मालपुवा, रोठ)</td><td></td></tr> <tr><td>10. केक</td><td></td></tr> <tr><td>11. आलुचिप्स तथा कुरकुरे</td><td></td></tr> <tr><td>12. दाल, भात, तरकारी</td><td></td></tr> <tr><td>13. मासु</td><td></td></tr> <tr><td>14. भोल भएको चाउचाउ</td><td></td></tr> <tr><td>15. सुख्खा चाउचाउ</td><td></td></tr> <tr><td>16. रोटी तरकारी</td><td></td></tr> <tr><td>17. च्युरा</td><td></td></tr> <tr><td>18. उपलब्ध हुने वा पाउने जति सबैप्रकारका खानेकुरा</td><td></td></tr> </tbody> </table> | प्रश्न | उत्तर | 1. सलाद (गाजर, मुला, काँक्रा आदि) |  | 2. तारेको तरकारी  |  | 3. ससेज, पीज्जा, बर्गर |  | 4. गुलियो पेय पदार्थ जस्तै कोकाकोला  |  | 5. फलफुल                                           |  | 6. डोनट, बिस्कुटआदि  |  | 7. चकलेट                    |  | 8. मिठाई (लड्डु, पेडा, बर्फी)                 |  | 9. पारम्पारिक नेपालीरोटी(सेलरोटी, मालपुवा, रोठ) |  | 10. केक                                    |  | 11. आलुचिप्स तथा कुरकुरे |                                                                                                                                    | 12. दाल, भात, तरकारी |  | 13. मासु |  | 14. भोल भएको चाउचाउ |  | 15. सुख्खा चाउचाउ |  | 16. रोटी तरकारी |  | 17. च्युरा |  | 18. उपलब्ध हुने वा पाउने जति सबैप्रकारका खानेकुरा |  |  | <p>Kd2.1</p> <p>Kd2.2</p> <p>Kd2.3</p> <p>Kd2.4</p> <p>Kd2.5</p> <p>Kd2.6</p> <p>Kd2.7</p> <p>Kd2.8</p> <p>Kd2.9</p> <p>Kd2.10</p> <p>Kd2.11</p> <p>Kd2.12</p> <p>Kd2.13</p> <p>Kd2.14</p> <p>Kd2.15</p> <p>Kd2.16</p> <p>Kd2.17</p> <p>Kd2.18</p> |
| प्रश्न                                             | उत्तर                                                                                                                                                                                                                                                                                                                                                  |                                                                                                                                                                                                                                                                                                                                                                                                                                                                                                                                                                                                                                                                                                                                                                                                                                                                                                                                                                                                                                   |        |       |                                   |  |                   |  |                        |  |                                      |  |                                                    |  |                      |  |                             |  |                                               |  |                                                 |  |                                            |  |                          |                                                                                                                                    |                      |  |          |  |                     |  |                   |  |                 |  |            |  |                                                   |  |  |                                                                                                                                                                                                                                                    |
| 1. सलाद (गाजर, मुला, काँक्रा आदि)                  |                                                                                                                                                                                                                                                                                                                                                        |                                                                                                                                                                                                                                                                                                                                                                                                                                                                                                                                                                                                                                                                                                                                                                                                                                                                                                                                                                                                                                   |        |       |                                   |  |                   |  |                        |  |                                      |  |                                                    |  |                      |  |                             |  |                                               |  |                                                 |  |                                            |  |                          |                                                                                                                                    |                      |  |          |  |                     |  |                   |  |                 |  |            |  |                                                   |  |  |                                                                                                                                                                                                                                                    |
| 2. तारेको तरकारी                                   |                                                                                                                                                                                                                                                                                                                                                        |                                                                                                                                                                                                                                                                                                                                                                                                                                                                                                                                                                                                                                                                                                                                                                                                                                                                                                                                                                                                                                   |        |       |                                   |  |                   |  |                        |  |                                      |  |                                                    |  |                      |  |                             |  |                                               |  |                                                 |  |                                            |  |                          |                                                                                                                                    |                      |  |          |  |                     |  |                   |  |                 |  |            |  |                                                   |  |  |                                                                                                                                                                                                                                                    |
| 3. ससेज, पीज्जा, बर्गर                             |                                                                                                                                                                                                                                                                                                                                                        |                                                                                                                                                                                                                                                                                                                                                                                                                                                                                                                                                                                                                                                                                                                                                                                                                                                                                                                                                                                                                                   |        |       |                                   |  |                   |  |                        |  |                                      |  |                                                    |  |                      |  |                             |  |                                               |  |                                                 |  |                                            |  |                          |                                                                                                                                    |                      |  |          |  |                     |  |                   |  |                 |  |            |  |                                                   |  |  |                                                                                                                                                                                                                                                    |
| 4. गुलियो पेय पदार्थ जस्तै कोकाकोला                |                                                                                                                                                                                                                                                                                                                                                        |                                                                                                                                                                                                                                                                                                                                                                                                                                                                                                                                                                                                                                                                                                                                                                                                                                                                                                                                                                                                                                   |        |       |                                   |  |                   |  |                        |  |                                      |  |                                                    |  |                      |  |                             |  |                                               |  |                                                 |  |                                            |  |                          |                                                                                                                                    |                      |  |          |  |                     |  |                   |  |                 |  |            |  |                                                   |  |  |                                                                                                                                                                                                                                                    |
| 5. फलफुल                                           |                                                                                                                                                                                                                                                                                                                                                        |                                                                                                                                                                                                                                                                                                                                                                                                                                                                                                                                                                                                                                                                                                                                                                                                                                                                                                                                                                                                                                   |        |       |                                   |  |                   |  |                        |  |                                      |  |                                                    |  |                      |  |                             |  |                                               |  |                                                 |  |                                            |  |                          |                                                                                                                                    |                      |  |          |  |                     |  |                   |  |                 |  |            |  |                                                   |  |  |                                                                                                                                                                                                                                                    |
| 6. डोनट, बिस्कुटआदि                                |                                                                                                                                                                                                                                                                                                                                                        |                                                                                                                                                                                                                                                                                                                                                                                                                                                                                                                                                                                                                                                                                                                                                                                                                                                                                                                                                                                                                                   |        |       |                                   |  |                   |  |                        |  |                                      |  |                                                    |  |                      |  |                             |  |                                               |  |                                                 |  |                                            |  |                          |                                                                                                                                    |                      |  |          |  |                     |  |                   |  |                 |  |            |  |                                                   |  |  |                                                                                                                                                                                                                                                    |
| 7. चकलेट                                           |                                                                                                                                                                                                                                                                                                                                                        |                                                                                                                                                                                                                                                                                                                                                                                                                                                                                                                                                                                                                                                                                                                                                                                                                                                                                                                                                                                                                                   |        |       |                                   |  |                   |  |                        |  |                                      |  |                                                    |  |                      |  |                             |  |                                               |  |                                                 |  |                                            |  |                          |                                                                                                                                    |                      |  |          |  |                     |  |                   |  |                 |  |            |  |                                                   |  |  |                                                                                                                                                                                                                                                    |
| 8. मिठाई (लड्डु, पेडा, बर्फी)                      |                                                                                                                                                                                                                                                                                                                                                        |                                                                                                                                                                                                                                                                                                                                                                                                                                                                                                                                                                                                                                                                                                                                                                                                                                                                                                                                                                                                                                   |        |       |                                   |  |                   |  |                        |  |                                      |  |                                                    |  |                      |  |                             |  |                                               |  |                                                 |  |                                            |  |                          |                                                                                                                                    |                      |  |          |  |                     |  |                   |  |                 |  |            |  |                                                   |  |  |                                                                                                                                                                                                                                                    |
| 9. पारम्पारिक नेपालीरोटी(सेलरोटी, मालपुवा, रोठ)    |                                                                                                                                                                                                                                                                                                                                                        |                                                                                                                                                                                                                                                                                                                                                                                                                                                                                                                                                                                                                                                                                                                                                                                                                                                                                                                                                                                                                                   |        |       |                                   |  |                   |  |                        |  |                                      |  |                                                    |  |                      |  |                             |  |                                               |  |                                                 |  |                                            |  |                          |                                                                                                                                    |                      |  |          |  |                     |  |                   |  |                 |  |            |  |                                                   |  |  |                                                                                                                                                                                                                                                    |
| 10. केक                                            |                                                                                                                                                                                                                                                                                                                                                        |                                                                                                                                                                                                                                                                                                                                                                                                                                                                                                                                                                                                                                                                                                                                                                                                                                                                                                                                                                                                                                   |        |       |                                   |  |                   |  |                        |  |                                      |  |                                                    |  |                      |  |                             |  |                                               |  |                                                 |  |                                            |  |                          |                                                                                                                                    |                      |  |          |  |                     |  |                   |  |                 |  |            |  |                                                   |  |  |                                                                                                                                                                                                                                                    |
| 11. आलुचिप्स तथा कुरकुरे                           |                                                                                                                                                                                                                                                                                                                                                        |                                                                                                                                                                                                                                                                                                                                                                                                                                                                                                                                                                                                                                                                                                                                                                                                                                                                                                                                                                                                                                   |        |       |                                   |  |                   |  |                        |  |                                      |  |                                                    |  |                      |  |                             |  |                                               |  |                                                 |  |                                            |  |                          |                                                                                                                                    |                      |  |          |  |                     |  |                   |  |                 |  |            |  |                                                   |  |  |                                                                                                                                                                                                                                                    |
| 12. दाल, भात, तरकारी                               |                                                                                                                                                                                                                                                                                                                                                        |                                                                                                                                                                                                                                                                                                                                                                                                                                                                                                                                                                                                                                                                                                                                                                                                                                                                                                                                                                                                                                   |        |       |                                   |  |                   |  |                        |  |                                      |  |                                                    |  |                      |  |                             |  |                                               |  |                                                 |  |                                            |  |                          |                                                                                                                                    |                      |  |          |  |                     |  |                   |  |                 |  |            |  |                                                   |  |  |                                                                                                                                                                                                                                                    |
| 13. मासु                                           |                                                                                                                                                                                                                                                                                                                                                        |                                                                                                                                                                                                                                                                                                                                                                                                                                                                                                                                                                                                                                                                                                                                                                                                                                                                                                                                                                                                                                   |        |       |                                   |  |                   |  |                        |  |                                      |  |                                                    |  |                      |  |                             |  |                                               |  |                                                 |  |                                            |  |                          |                                                                                                                                    |                      |  |          |  |                     |  |                   |  |                 |  |            |  |                                                   |  |  |                                                                                                                                                                                                                                                    |
| 14. भोल भएको चाउचाउ                                |                                                                                                                                                                                                                                                                                                                                                        |                                                                                                                                                                                                                                                                                                                                                                                                                                                                                                                                                                                                                                                                                                                                                                                                                                                                                                                                                                                                                                   |        |       |                                   |  |                   |  |                        |  |                                      |  |                                                    |  |                      |  |                             |  |                                               |  |                                                 |  |                                            |  |                          |                                                                                                                                    |                      |  |          |  |                     |  |                   |  |                 |  |            |  |                                                   |  |  |                                                                                                                                                                                                                                                    |
| 15. सुख्खा चाउचाउ                                  |                                                                                                                                                                                                                                                                                                                                                        |                                                                                                                                                                                                                                                                                                                                                                                                                                                                                                                                                                                                                                                                                                                                                                                                                                                                                                                                                                                                                                   |        |       |                                   |  |                   |  |                        |  |                                      |  |                                                    |  |                      |  |                             |  |                                               |  |                                                 |  |                                            |  |                          |                                                                                                                                    |                      |  |          |  |                     |  |                   |  |                 |  |            |  |                                                   |  |  |                                                                                                                                                                                                                                                    |
| 16. रोटी तरकारी                                    |                                                                                                                                                                                                                                                                                                                                                        |                                                                                                                                                                                                                                                                                                                                                                                                                                                                                                                                                                                                                                                                                                                                                                                                                                                                                                                                                                                                                                   |        |       |                                   |  |                   |  |                        |  |                                      |  |                                                    |  |                      |  |                             |  |                                               |  |                                                 |  |                                            |  |                          |                                                                                                                                    |                      |  |          |  |                     |  |                   |  |                 |  |            |  |                                                   |  |  |                                                                                                                                                                                                                                                    |
| 17. च्युरा                                         |                                                                                                                                                                                                                                                                                                                                                        |                                                                                                                                                                                                                                                                                                                                                                                                                                                                                                                                                                                                                                                                                                                                                                                                                                                                                                                                                                                                                                   |        |       |                                   |  |                   |  |                        |  |                                      |  |                                                    |  |                      |  |                             |  |                                               |  |                                                 |  |                                            |  |                          |                                                                                                                                    |                      |  |          |  |                     |  |                   |  |                 |  |            |  |                                                   |  |  |                                                                                                                                                                                                                                                    |
| 18. उपलब्ध हुने वा पाउने जति सबैप्रकारका खानेकुरा  |                                                                                                                                                                                                                                                                                                                                                        |                                                                                                                                                                                                                                                                                                                                                                                                                                                                                                                                                                                                                                                                                                                                                                                                                                                                                                                                                                                                                                   |        |       |                                   |  |                   |  |                        |  |                                      |  |                                                    |  |                      |  |                             |  |                                               |  |                                                 |  |                                            |  |                          |                                                                                                                                    |                      |  |          |  |                     |  |                   |  |                 |  |            |  |                                                   |  |  |                                                                                                                                                                                                                                                    |

| 28.                       | <p>अब म तपाईंलाई केही रोग वा विमारीहरुको बारेमा भन्नेछु र तपाईंले मलाई भन्नुस् कि, के यी रोग वा विमारी अस्वस्थकर खानपान ( खानेकुरा)सँग सम्बन्धित छ कि छैन?</p> <p>(दायाँतिर भएका प्रत्येक रोग वा विमारी पढेर सुनाउनुहोस् र प्रत्येकमा सम्बन्धि छ छ वा छैन भनी सोध्नुहोस् ।<br/>उत्तरदाताबाट आएको उत्तरलाई सँगैको बाकसभित्र सम्बन्धित छ भने "1" तथा छैन भने "0" र थाहा छैन भने "99" लेख्नुहोस् ।)</p> | <table border="1"> <thead> <tr> <th>प्रश्न</th> <th>उत्तर</th> </tr> </thead> <tbody> <tr><td>1. दाँतको खराबी</td><td></td></tr> <tr><td>2. चोटपटक लाग्ने</td><td></td></tr> <tr><td>3. मधुमेह वा चिनीरोग हुने</td><td></td></tr> <tr><td>4. कुष्ठरोग लाग्ने</td><td></td></tr> <tr><td>5. मुटुको रोग लाग्ने</td><td></td></tr> <tr><td>6. उच्च रक्तचाप हुने</td><td></td></tr> <tr><td>7. भाडापखाला</td><td></td></tr> <tr><td>8. रेबिज लाग्ने (बहुला कुकुरले टोक्दा हुने रोग)</td><td></td></tr> <tr><td>9. औलो (मलेरिया) लाग्ने</td><td></td></tr> <tr><td>10. एचआइभी एड्स लाग्ने</td><td></td></tr> <tr><td>11. अर्बुद रोग (क्यान्सर)</td><td></td></tr> </tbody> </table> | प्रश्न                           | उत्तर | 1. दाँतको खराबी |  | 2. चोटपटक लाग्ने |  | 3. मधुमेह वा चिनीरोग हुने |  | 4. कुष्ठरोग लाग्ने |  | 5. मुटुको रोग लाग्ने |  | 6. उच्च रक्तचाप हुने |  | 7. भाडापखाला |  | 8. रेबिज लाग्ने (बहुला कुकुरले टोक्दा हुने रोग) |  | 9. औलो (मलेरिया) लाग्ने |  | 10. एचआइभी एड्स लाग्ने |  | 11. अर्बुद रोग (क्यान्सर) |  | <p>Kd3.1<br/>Kd3.2<br/>Kd3.3<br/>Kd3.4<br/>Kd3.5<br/>Kd3.6<br/>Kd3.7<br/>Kd3.8<br/>Kd3.9<br/>Kd3.10<br/>Kd3.11</p> |
|---------------------------|------------------------------------------------------------------------------------------------------------------------------------------------------------------------------------------------------------------------------------------------------------------------------------------------------------------------------------------------------------------------------------------------------|--------------------------------------------------------------------------------------------------------------------------------------------------------------------------------------------------------------------------------------------------------------------------------------------------------------------------------------------------------------------------------------------------------------------------------------------------------------------------------------------------------------------------------------------------------------------------------------------------------------------------------------------------------------------------------|----------------------------------|-------|-----------------|--|------------------|--|---------------------------|--|--------------------|--|----------------------|--|----------------------|--|--------------|--|-------------------------------------------------|--|-------------------------|--|------------------------|--|---------------------------|--|--------------------------------------------------------------------------------------------------------------------|
|                           |                                                                                                                                                                                                                                                                                                                                                                                                      | प्रश्न                                                                                                                                                                                                                                                                                                                                                                                                                                                                                                                                                                                                                                                                         | उत्तर                            |       |                 |  |                  |  |                           |  |                    |  |                      |  |                      |  |              |  |                                                 |  |                         |  |                        |  |                           |  |                                                                                                                    |
|                           |                                                                                                                                                                                                                                                                                                                                                                                                      | 1. दाँतको खराबी                                                                                                                                                                                                                                                                                                                                                                                                                                                                                                                                                                                                                                                                |                                  |       |                 |  |                  |  |                           |  |                    |  |                      |  |                      |  |              |  |                                                 |  |                         |  |                        |  |                           |  |                                                                                                                    |
|                           |                                                                                                                                                                                                                                                                                                                                                                                                      | 2. चोटपटक लाग्ने                                                                                                                                                                                                                                                                                                                                                                                                                                                                                                                                                                                                                                                               |                                  |       |                 |  |                  |  |                           |  |                    |  |                      |  |                      |  |              |  |                                                 |  |                         |  |                        |  |                           |  |                                                                                                                    |
|                           |                                                                                                                                                                                                                                                                                                                                                                                                      | 3. मधुमेह वा चिनीरोग हुने                                                                                                                                                                                                                                                                                                                                                                                                                                                                                                                                                                                                                                                      |                                  |       |                 |  |                  |  |                           |  |                    |  |                      |  |                      |  |              |  |                                                 |  |                         |  |                        |  |                           |  |                                                                                                                    |
|                           |                                                                                                                                                                                                                                                                                                                                                                                                      | 4. कुष्ठरोग लाग्ने                                                                                                                                                                                                                                                                                                                                                                                                                                                                                                                                                                                                                                                             |                                  |       |                 |  |                  |  |                           |  |                    |  |                      |  |                      |  |              |  |                                                 |  |                         |  |                        |  |                           |  |                                                                                                                    |
|                           |                                                                                                                                                                                                                                                                                                                                                                                                      | 5. मुटुको रोग लाग्ने                                                                                                                                                                                                                                                                                                                                                                                                                                                                                                                                                                                                                                                           |                                  |       |                 |  |                  |  |                           |  |                    |  |                      |  |                      |  |              |  |                                                 |  |                         |  |                        |  |                           |  |                                                                                                                    |
|                           |                                                                                                                                                                                                                                                                                                                                                                                                      | 6. उच्च रक्तचाप हुने                                                                                                                                                                                                                                                                                                                                                                                                                                                                                                                                                                                                                                                           |                                  |       |                 |  |                  |  |                           |  |                    |  |                      |  |                      |  |              |  |                                                 |  |                         |  |                        |  |                           |  |                                                                                                                    |
|                           |                                                                                                                                                                                                                                                                                                                                                                                                      | 7. भाडापखाला                                                                                                                                                                                                                                                                                                                                                                                                                                                                                                                                                                                                                                                                   |                                  |       |                 |  |                  |  |                           |  |                    |  |                      |  |                      |  |              |  |                                                 |  |                         |  |                        |  |                           |  |                                                                                                                    |
|                           |                                                                                                                                                                                                                                                                                                                                                                                                      | 8. रेबिज लाग्ने (बहुला कुकुरले टोक्दा हुने रोग)                                                                                                                                                                                                                                                                                                                                                                                                                                                                                                                                                                                                                                |                                  |       |                 |  |                  |  |                           |  |                    |  |                      |  |                      |  |              |  |                                                 |  |                         |  |                        |  |                           |  |                                                                                                                    |
|                           |                                                                                                                                                                                                                                                                                                                                                                                                      | 9. औलो (मलेरिया) लाग्ने                                                                                                                                                                                                                                                                                                                                                                                                                                                                                                                                                                                                                                                        |                                  |       |                 |  |                  |  |                           |  |                    |  |                      |  |                      |  |              |  |                                                 |  |                         |  |                        |  |                           |  |                                                                                                                    |
|                           |                                                                                                                                                                                                                                                                                                                                                                                                      | 10. एचआइभी एड्स लाग्ने                                                                                                                                                                                                                                                                                                                                                                                                                                                                                                                                                                                                                                                         |                                  |       |                 |  |                  |  |                           |  |                    |  |                      |  |                      |  |              |  |                                                 |  |                         |  |                        |  |                           |  |                                                                                                                    |
| 11. अर्बुद रोग (क्यान्सर) |                                                                                                                                                                                                                                                                                                                                                                                                      |                                                                                                                                                                                                                                                                                                                                                                                                                                                                                                                                                                                                                                                                                |                                  |       |                 |  |                  |  |                           |  |                    |  |                      |  |                      |  |              |  |                                                 |  |                         |  |                        |  |                           |  |                                                                                                                    |
| 29.                       | <p>तपाईंको विचारमा, के हामीले खाएको खानेकुराले मुटुलाई असर गर्छ कि गर्दैन ?</p> <p>(दायाँतिर भएका उत्तरहरु तुरुन्तै नभन्नुस् । प्रश्न सोधेपछि केही समय पर्खनुस् । यदि सहभागीलाई उत्तर भन्न गाह्रो भएमा मात्र उक्त उत्तरहरु पढ्नुहोला ।)</p>                                                                                                                                                          | <p>1. गर्छ<br/>2. गर्दैन<br/>3. यसको बारेमा सोचेकै छैन<br/>4. गर्छ तर म वास्ता नै गर्दिन<br/>5. मलाई थाहा छैन<br/>6. अन्य (उल्लेख गर्ने) _____</p>                                                                                                                                                                                                                                                                                                                                                                                                                                                                                                                             | <p>Kd4</p>                       |       |                 |  |                  |  |                           |  |                    |  |                      |  |                      |  |              |  |                                                 |  |                         |  |                        |  |                           |  |                                                                                                                    |
| 30.                       | <p>तपाईंको विचारमा <b>जंक फुड</b> भनेको के हो अनि के कस्ता खानेकुरालाई <b>जंक फुड</b> भन्नुहुन्छ ?</p> <p>(यो कुनै खानेकुरा वा खानेकुराको प्रकार हुनसक्छ । उत्तरदाताबाट आएको सबै उत्तरहरुलाई बेग्लाबेग्लै हरफमा वा लाइनमा लेख्नुहोला)</p>                                                                                                                                                            | <p>1. _____<br/>2. _____<br/>3. _____</p>                                                                                                                                                                                                                                                                                                                                                                                                                                                                                                                                                                                                                                      | <p>Kd5.1<br/>Kd5.2<br/>Kd5.3</p> |       |                 |  |                  |  |                           |  |                    |  |                      |  |                      |  |              |  |                                                 |  |                         |  |                        |  |                           |  |                                                                                                                    |
| 31.                       | <p>तपाईंको विचारमा, तपाईंको परिवारले घरमा प्रायजसो खाने गरेको खाना वा खानेकुरा कतिको स्वस्थकर छ ?</p>                                                                                                                                                                                                                                                                                                | <p>1. एकदम स्वस्थकर छ<br/>2. अलिअलि स्वस्थकर छ<br/>3. त्यति स्वस्थकर छैन<br/>4. एकदमै अस्वस्थकर छ<br/>5. थाहा छैन वा भन्न सकिदैन</p>                                                                                                                                                                                                                                                                                                                                                                                                                                                                                                                                           | <p>Kd6</p>                       |       |                 |  |                  |  |                           |  |                    |  |                      |  |                      |  |              |  |                                                 |  |                         |  |                        |  |                           |  |                                                                                                                    |

### 32. स्वस्थकर खानपानमा तलका तत्वहरुको मात्रा कतिको हुनुपर्छ ?

म तपाईंलाई स्वास्थ्यका लागि खानेकुराहरुमा पाइने विभिन्न प्रकारका तत्वहरुको भूमिका के हुन्छ भनी सोध्नेछु । स्वस्थ खानपानमा तल दिइएका तत्वहरुको मात्रा के कति थोरै वा धेरै हुनुपर्छ होला ?

| Items<br>तत्वहरु                       | A<br>धेरै<br>मात्रामा<br>चाहिन्छ | B<br>थोरै<br>मात्रामा<br>चाहिन्छ | C<br>ठिकै<br>मात्रामा<br>चाहिन्छ | D<br>थोरै-धेरै जति खाए<br>पनि स्वास्थ्यको लागि<br>खासै फरक पर्दैन | E<br>थाहा<br>छैन | कोड   |
|----------------------------------------|----------------------------------|----------------------------------|----------------------------------|-------------------------------------------------------------------|------------------|-------|
| 32.1 नून                               |                                  |                                  |                                  |                                                                   |                  | Kd7.1 |
| 32.2 चिनी                              |                                  |                                  |                                  |                                                                   |                  | Kd7.2 |
| 32.3 अन्न-गेडागुडी                     |                                  |                                  |                                  |                                                                   |                  | Kd7.3 |
| 32.4 फलफुल                             |                                  |                                  |                                  |                                                                   |                  | Kd7.4 |
| 32.5 सागसब्जी                          |                                  |                                  |                                  |                                                                   |                  | Kd7.5 |
| 32.6 मासुको बोसो, तेल, घ्यू, बटर, नौनी |                                  |                                  |                                  |                                                                   |                  | Kd7.6 |

**B. शारीरिक क्रियाकलाप वा अभ्यास**

अब म तपाईंलाई शारीरिक क्रियाकलाप वा अभ्यास भन्नाले तपाईं के बुझ्नुहुन्छ भनी सोध्नेछु ।

| क्र.सं.                                      | प्रश्नहरू                                                                                                                                                                                                                                                                                                                                                                                                                 | उत्तर                                                                                                                                                                                                                                                                                                                                                                                                                                                                                                                                                                                                                                                           | कोड                              |       |                                   |  |                               |  |                                  |  |                           |  |                        |  |                                              |  |                      |  |                            |  |                            |  |                                                                               |
|----------------------------------------------|---------------------------------------------------------------------------------------------------------------------------------------------------------------------------------------------------------------------------------------------------------------------------------------------------------------------------------------------------------------------------------------------------------------------------|-----------------------------------------------------------------------------------------------------------------------------------------------------------------------------------------------------------------------------------------------------------------------------------------------------------------------------------------------------------------------------------------------------------------------------------------------------------------------------------------------------------------------------------------------------------------------------------------------------------------------------------------------------------------|----------------------------------|-------|-----------------------------------|--|-------------------------------|--|----------------------------------|--|---------------------------|--|------------------------|--|----------------------------------------------|--|----------------------|--|----------------------------|--|----------------------------|--|-------------------------------------------------------------------------------|
| 33.                                          | हाम्रो स्वास्थ्यमा शारीरिक क्रियाकलापको के भूमिका हुन्छ?<br><br>(उत्तरदाता-सहभागीलाई तपाईंले जे बुझ्नु भएको छ त्यही भन्दा हुन्छ भन्नुहोस्)                                                                                                                                                                                                                                                                                | 1. _____<br>2. _____<br>3. _____<br>4. _____                                                                                                                                                                                                                                                                                                                                                                                                                                                                                                                                                                                                                    | Kp1.1<br>Kp1.2<br>Kp1.3<br>Kp1.4 |       |                                   |  |                               |  |                                  |  |                           |  |                        |  |                                              |  |                      |  |                            |  |                            |  |                                                                               |
| 34.                                          | अब म तपाईंलाई विभिन्न स्वास्थ्य स्थिति वा स्वास्थ्य अवस्थाहरूको बारेमा भन्नेछु । यीमध्ये कुन चाहिँ पर्याप्त मात्रामा शारीरिक अभ्यास (क्रियाकलाप)को कारणले गर्दा हुन्छ वा हुँदैन भन्नुहोस् ।<br>(दायाँतिर भएका प्रत्येक स्वास्थ्य अवस्था पढेर सुनाउनुहोस् र प्रत्येकमा हुन्छ वा हुँदैन भनी सोध्नुहोस् ।<br>उत्तरदाताबाट आएको उत्तरलाई सँगैको बाकस भित्र हुन्छ भने "1" तथा हुँदैन भने "0" र थाहा छैन भने "99" लेख्नुहोस् ।) | <table border="1"> <thead> <tr> <th>प्रश्न</th> <th>उत्तर</th> </tr> </thead> <tbody> <tr> <td>1. शारीरिक स्वास्थ्य राम्रो हुन्छ</td> <td></td> </tr> <tr> <td>2. शारीरिक स्वास्थ्य बिग्रन्छ</td> <td></td> </tr> <tr> <td>3. मानसिक स्वास्थ्य राम्रो हुन्छ</td> <td></td> </tr> <tr> <td>4. रोगसँग लड्न मद्दत गर्छ</td> <td></td> </tr> <tr> <td>5. घाउ वा चोटपटक लाग्छ</td> <td></td> </tr> <tr> <td>6. दिक्क लाग्ने, उदासिन हुने वा चिन्तित हुने</td> <td></td> </tr> <tr> <td>7. मुटुलाई हानी गर्छ</td> <td></td> </tr> <tr> <td>8. आकर्षक देखिन मद्दत गर्छ</td> <td></td> </tr> <tr> <td>9. चोटपटक लाग्नबाट जोगाउँछ</td> <td></td> </tr> </tbody> </table> | प्रश्न                           | उत्तर | 1. शारीरिक स्वास्थ्य राम्रो हुन्छ |  | 2. शारीरिक स्वास्थ्य बिग्रन्छ |  | 3. मानसिक स्वास्थ्य राम्रो हुन्छ |  | 4. रोगसँग लड्न मद्दत गर्छ |  | 5. घाउ वा चोटपटक लाग्छ |  | 6. दिक्क लाग्ने, उदासिन हुने वा चिन्तित हुने |  | 7. मुटुलाई हानी गर्छ |  | 8. आकर्षक देखिन मद्दत गर्छ |  | 9. चोटपटक लाग्नबाट जोगाउँछ |  | Kp2.1<br>Kp2.2<br>Kp2.3<br>Kp2.4<br>Kp2.5<br>Kp2.6<br>Kp2.7<br>Kp2.8<br>Kp2.9 |
| प्रश्न                                       | उत्तर                                                                                                                                                                                                                                                                                                                                                                                                                     |                                                                                                                                                                                                                                                                                                                                                                                                                                                                                                                                                                                                                                                                 |                                  |       |                                   |  |                               |  |                                  |  |                           |  |                        |  |                                              |  |                      |  |                            |  |                            |  |                                                                               |
| 1. शारीरिक स्वास्थ्य राम्रो हुन्छ            |                                                                                                                                                                                                                                                                                                                                                                                                                           |                                                                                                                                                                                                                                                                                                                                                                                                                                                                                                                                                                                                                                                                 |                                  |       |                                   |  |                               |  |                                  |  |                           |  |                        |  |                                              |  |                      |  |                            |  |                            |  |                                                                               |
| 2. शारीरिक स्वास्थ्य बिग्रन्छ                |                                                                                                                                                                                                                                                                                                                                                                                                                           |                                                                                                                                                                                                                                                                                                                                                                                                                                                                                                                                                                                                                                                                 |                                  |       |                                   |  |                               |  |                                  |  |                           |  |                        |  |                                              |  |                      |  |                            |  |                            |  |                                                                               |
| 3. मानसिक स्वास्थ्य राम्रो हुन्छ             |                                                                                                                                                                                                                                                                                                                                                                                                                           |                                                                                                                                                                                                                                                                                                                                                                                                                                                                                                                                                                                                                                                                 |                                  |       |                                   |  |                               |  |                                  |  |                           |  |                        |  |                                              |  |                      |  |                            |  |                            |  |                                                                               |
| 4. रोगसँग लड्न मद्दत गर्छ                    |                                                                                                                                                                                                                                                                                                                                                                                                                           |                                                                                                                                                                                                                                                                                                                                                                                                                                                                                                                                                                                                                                                                 |                                  |       |                                   |  |                               |  |                                  |  |                           |  |                        |  |                                              |  |                      |  |                            |  |                            |  |                                                                               |
| 5. घाउ वा चोटपटक लाग्छ                       |                                                                                                                                                                                                                                                                                                                                                                                                                           |                                                                                                                                                                                                                                                                                                                                                                                                                                                                                                                                                                                                                                                                 |                                  |       |                                   |  |                               |  |                                  |  |                           |  |                        |  |                                              |  |                      |  |                            |  |                            |  |                                                                               |
| 6. दिक्क लाग्ने, उदासिन हुने वा चिन्तित हुने |                                                                                                                                                                                                                                                                                                                                                                                                                           |                                                                                                                                                                                                                                                                                                                                                                                                                                                                                                                                                                                                                                                                 |                                  |       |                                   |  |                               |  |                                  |  |                           |  |                        |  |                                              |  |                      |  |                            |  |                            |  |                                                                               |
| 7. मुटुलाई हानी गर्छ                         |                                                                                                                                                                                                                                                                                                                                                                                                                           |                                                                                                                                                                                                                                                                                                                                                                                                                                                                                                                                                                                                                                                                 |                                  |       |                                   |  |                               |  |                                  |  |                           |  |                        |  |                                              |  |                      |  |                            |  |                            |  |                                                                               |
| 8. आकर्षक देखिन मद्दत गर्छ                   |                                                                                                                                                                                                                                                                                                                                                                                                                           |                                                                                                                                                                                                                                                                                                                                                                                                                                                                                                                                                                                                                                                                 |                                  |       |                                   |  |                               |  |                                  |  |                           |  |                        |  |                                              |  |                      |  |                            |  |                            |  |                                                                               |
| 9. चोटपटक लाग्नबाट जोगाउँछ                   |                                                                                                                                                                                                                                                                                                                                                                                                                           |                                                                                                                                                                                                                                                                                                                                                                                                                                                                                                                                                                                                                                                                 |                                  |       |                                   |  |                               |  |                                  |  |                           |  |                        |  |                                              |  |                      |  |                            |  |                            |  |                                                                               |

35. म तपाईंलाई रोगहरूका केही उदाहरणहरू बताउने छु । कुनैपनि मानिसले कतिको शारीरिक (क्रियाकलाप) अभ्यास गर्छ, त्यसले यी रोगहरूको विकास हुन मद्दत गर्छ कि गर्दैन?

(उत्तर मिल्ने कोठामा चिन्ह (√) लाउनुहोला)

| Condition<br>अवस्था                           | A<br>गर्छ | B<br>गर्दैन | C<br>थाहा छैन | कोड    |
|-----------------------------------------------|-----------|-------------|---------------|--------|
| 35.1 मधुमेह वा चिनीरोग                        |           |             |               | Kp3.1  |
| 35.2 अर्बुद रोग (क्यान्सर)                    |           |             |               | Kp3.2  |
| 35.3 एचआइभी एड्स                              |           |             |               | Kp3.3  |
| 35.4 ग्यास्ट्राइटिस                           |           |             |               | Kp3.4  |
| 35.5 मोटोपना हुने                             |           |             |               | Kp3.5  |
| 35.6 भाडा-पखाला                               |           |             |               | Kp3.6  |
| 35.7 आँखाको नानीमा रोग (फुलो)                 |           |             |               | Kp3.7  |
| 35.8 उच्च रक्तचाप                             |           |             |               | Kp3.8  |
| 35.9 मष्तिस्कमा मासु पलाउने                   |           |             |               | Kp3.9  |
| 35.10 एपेन्डिसाईटिस (पुच्छे आन्द्रा सुन्निते) |           |             |               | Kp3.10 |

IV. आमाको (अव)धारणा

A. खानपान

अब म खानपान सम्बन्धी तपाईंको सोचाइ के छ बुझ्न चाहन्छु ।

36. म केही बनाइहरु पढेर सुनाउनेछु । यी बनाइहरु प्रति तपाईंको धारणा वा विचार भन्नुहोस् । तपाईं एकदमै सहमत वा अलिअलि सहमत वा असहमत वा एकदमै असहमत वा थाहा छैन भन्न सक्नुहुनेछ ।

(उत्तर मिल्ने कोठामा चिन्ह (✓) लाउनुहोला तर प्रत्येक बनाइमा एउटा मात्र उत्तर हुनेछ ।)

| Statements<br>भनाइहरु |                                                                                                     | A<br>एकदमै<br>सहमत | B<br>अलिअलि<br>सहमत | C<br>अलिअलि<br>असहमत | D<br>एकदमै<br>असहमत | E<br>थाहा छैन | कोड    |
|-----------------------|-----------------------------------------------------------------------------------------------------|--------------------|---------------------|----------------------|---------------------|---------------|--------|
| 36.1                  | स्वस्थकर खानेकुरा महत्वपूर्ण हुन्छ                                                                  |                    |                     |                      |                     |               | Ad1.1  |
| 36.2                  | स्वस्थकर खानेकुरा आनन्दायी हुन्छ                                                                    |                    |                     |                      |                     |               | Ad1.2  |
| 36.3                  | आफुले खाने खानेकुराको बारेमा सचेत हुनुपर्छ                                                          |                    |                     |                      |                     |               | Ad1.3  |
| 36.4                  | स्वस्थकर खानेकुरा स्वादिलो हुँदैन                                                                   |                    |                     |                      |                     |               | Ad1.4  |
| 36.5                  | स्वस्थकर खानेकुरा विरामीका लागि हो                                                                  |                    |                     |                      |                     |               | Ad1.5  |
| 36.6                  | यदि शारीरिक अभ्यास गरिन्छ भने आफुलाई मन लागेको जे खाए पनि हुन्छ                                     |                    |                     |                      |                     |               | Ad1.6  |
| 36.7                  | यदि कुनै रोगको लक्षण छैन भने आफुलाई मन लागेको जे खाए पनि हुन्छ                                      |                    |                     |                      |                     |               | Ad1.7  |
| 36.8                  | स्वादिला खानेकुराहरुले स्वास्थ्यलाई खराब गर्छ                                                       |                    |                     |                      |                     |               | Ad1.8  |
| 36.9                  | आफ्नो र आफ्ना बच्चाहरुको स्वास्थ्यका लागि खानपानमा धेरै ध्यान दिनुपर्छ                              |                    |                     |                      |                     |               | Ad1.9  |
| 36.10                 | आफुले खाने खानेकुरामा पाइने शक्ति (क्यालोरी)को विचार गर्नुपर्छ                                      |                    |                     |                      |                     |               | Ad1.10 |
| 36.11                 | हल्का पेय पदार्थ (जस्तै : कोकाकोला) गर्मीको समयमा राम्रो हुन्छ                                      |                    |                     |                      |                     |               | Ad1.11 |
| 36.12                 | बच्चाहरुका लागि हल्का पेय पदार्थ जस्तै:कोकाकोला) दिनु ठिक हो किन कि यी पेय पदार्थहरु स्वस्थकर हुन्छ |                    |                     |                      |                     |               | Ad1.12 |
| 36.13                 | विमारी पर्नु भनेको आ-आफ्नो भाग्यको कुरा हो, खानेकुराको कारणले हैन                                   |                    |                     |                      |                     |               | Ad1.13 |
| 36.14                 | यदि बच्चाहरु चिन्तित् छन् अथवा खुशी छैनन् भने उनीहरुको मनपर्ने खानाले उनीहरुलाई खुशी पार्दछ         |                    |                     |                      |                     |               | Ad1.14 |
| 36.15                 | आफ्नो बच्चालाई माया गरिन्छ भने उनीहरुलाई मनपर्ने मिठाई वा चकलेट किनीदिनु पर्छ                       |                    |                     |                      |                     |               | Ad1.15 |



37. अब म बालबालिकाको स्वास्थ्यमा सञ्चार माध्यमले पार्ने प्रभावका बारेमा केही भनाइहरु पढेर सुनाउनेछु । यी भनाइहरु तपाईंको बच्चाहरुको लागि लागु हुन पनि सक्छ वा नहुन पनि सक्छ । यी भनाइहरुमा तपाईंको आफ्नो धारणा राख्नुहोला । तपाईं यसमा पूर्ण सहमत वा अलिअलि सहमत वा अलिअलि असहमत वा पूर्ण असहमत वा थाहा छैन भन्न सक्नुहुनेछ ।

(उत्तर मिल्ने कोठामा चिन्ह (✓) लाउनुहोला तर प्रत्येक भनाइमा एउटा मात्र उत्तर हुनेछ ।)

| Statements<br>भनाइहरु                                                                                                                    | A<br>पूर्ण<br>सहमत | B<br>अलिअलि<br>सहमत | C<br>अलिअलि<br>असहमत | D<br>पूर्ण<br>असहमत | E<br>थाहा छैन | कोड   |
|------------------------------------------------------------------------------------------------------------------------------------------|--------------------|---------------------|----------------------|---------------------|---------------|-------|
| 37.1 आफ्ना बच्चालाई स्वस्थकर र सन्तुलित खानेकुरा खुवाउने कुरालाई सञ्चार माध्यमको विज्ञापनले अभिभावकलाई मद्दत गरेको हुन्छ ।               |                    |                     |                      |                     |               | Ad2.1 |
| 37.2 सञ्चार माध्यमको विज्ञापनले बालबालिका तथा उनीहरुका अभिभावकलाई अनावश्यक र कहिलेकाहीं हानीकारक उत्पादन किन्नका लागि उक्साइरहेको हुन्छ। |                    |                     |                      |                     |               | Ad2.2 |
| 37.3 बालबालिकाको वजन बढ्ने समस्या तथा खराब दाँतका लागि धेरै हदसम्म सञ्चार माध्यमको विज्ञापन जिम्मेवार हुन्छ ।                            |                    |                     |                      |                     |               | Ad2.3 |

| क्र. सं.                           | प्रश्नहरु                                                                                                                                                                                                                                                                                                                                                       | उत्तर                               |       | कोड    |
|------------------------------------|-----------------------------------------------------------------------------------------------------------------------------------------------------------------------------------------------------------------------------------------------------------------------------------------------------------------------------------------------------------------|-------------------------------------|-------|--------|
| 38.                                | म तपाईंलाई विभिन्न प्रकारका खानेकुराहरु एक-एक गरी पढेर सुनाउनेछु । यीमध्ये कुनकुन खानेकुरा तपाईंलाई मिठो वा स्वादिलो लाग्छ ?<br><br>(दायाँतिर भएका प्रत्येक खानेकुरा पढेर सुनाउनुहोस् र प्रत्येकमा मिठो लाग्छ वा लाग्दैन भनी सोध्नुहोस् । उत्तरदाताबाट आएको उत्तरलाई सँगैको बाकस भित्र मिठो लाग्छ भने "1" तथा लाग्दैन भने "0" र थाहा छैन भने "99" लेख्नुहोस् ।) | प्रश्न                              | उत्तर |        |
|                                    |                                                                                                                                                                                                                                                                                                                                                                 | 1. तारेको तरकारी                    |       | Ad3.1  |
|                                    |                                                                                                                                                                                                                                                                                                                                                                 | 2. ससेज, पिज्जा                     |       | Ad3.2  |
|                                    |                                                                                                                                                                                                                                                                                                                                                                 | 3. गुलियो पेय पदार्थ जस्तै कोकाकोला |       | Ad3.3  |
|                                    |                                                                                                                                                                                                                                                                                                                                                                 | 4. फलफुल                            |       | Ad3.4  |
|                                    |                                                                                                                                                                                                                                                                                                                                                                 | 5. डोनट, बिस्कुट आदि                |       | Ad3.5  |
|                                    |                                                                                                                                                                                                                                                                                                                                                                 | 6. चकलेट                            |       | Ad3.6  |
|                                    |                                                                                                                                                                                                                                                                                                                                                                 | 7. मिठाई                            |       | Ad3.7  |
|                                    |                                                                                                                                                                                                                                                                                                                                                                 | 8. केक                              |       | Ad3.8  |
|                                    |                                                                                                                                                                                                                                                                                                                                                                 | 9. आलुचिप्स तथा कुरकुरे             |       | Ad3.9  |
|                                    |                                                                                                                                                                                                                                                                                                                                                                 | 10. दाल, भात, तरकारी                |       | Ad3.10 |
|                                    |                                                                                                                                                                                                                                                                                                                                                                 | 11. मासु                            |       | Ad3.11 |
|                                    |                                                                                                                                                                                                                                                                                                                                                                 | 12. भोल भएको चाउचाउ                 |       | Ad3.12 |
|                                    |                                                                                                                                                                                                                                                                                                                                                                 | 13. सुख्खा चाउचाउ                   |       | Ad3.13 |
|                                    |                                                                                                                                                                                                                                                                                                                                                                 | 14. रोटी तरकारी                     |       | Ad3.14 |
| 15. सलाद (गाजर, मुला, काँक्रा आदि) |                                                                                                                                                                                                                                                                                                                                                                 | Ad3.15                              |       |        |
| 39.                                | खानपिनको सम्बन्धी जानकारी तपाईंले को बाट पाउँनुहुन्छ ?<br><br>(प्राप्त उत्तरमा घेरा लाउनुहोस्)<br><br>(बहु-उत्तर प्रश्न)<br>(Multiple answer question)<br><br>(दायाँतिर भएका उत्तरहरु तुरुन्तै नभन्नुस् । प्रश्न सोधेपछि केही समय पर्खनुस् । यदि सहभागीले कुनैपनि उत्तर भन्न सकेन भने मात्र उक्त उत्तरहरु पढ्नुहोला ।)                                          | प्रश्न                              |       |        |
|                                    |                                                                                                                                                                                                                                                                                                                                                                 | 1. आफ्नी आमा वा सासू                |       | Ad4.1  |
|                                    |                                                                                                                                                                                                                                                                                                                                                                 | 2. अन्य नातेदार                     |       | Ad4.2  |
|                                    |                                                                                                                                                                                                                                                                                                                                                                 | 3. साथी वा छिमेकी                   |       | Ad4.4  |
|                                    |                                                                                                                                                                                                                                                                                                                                                                 | 4. टेलिभिजन, रेडियो वा पत्रपत्रिका  |       | Ad4.5  |
|                                    |                                                                                                                                                                                                                                                                                                                                                                 | 5. पुस्तकहरु                        |       | Ad4.6  |
|                                    |                                                                                                                                                                                                                                                                                                                                                                 | 6. विद्युतीय सञ्चार माध्यम ईन्टरनेट |       | Ad4.7  |
|                                    |                                                                                                                                                                                                                                                                                                                                                                 | 7. अन्य (उल्लेख गर्नुहोस् _____)    |       | Ad4.8  |
|                                    |                                                                                                                                                                                                                                                                                                                                                                 | 8. पोषणसम्बन्धी जानकारी नै छैन      |       | Ad4.9  |
| 9. थाहा छैन वा भन्न सकिदैन         |                                                                                                                                                                                                                                                                                                                                                                 |                                     |       |        |

| 40.                                                           | <p>तपाईंलाई स्वस्थकर खानेकुराको बारेमा कतिको जानकारी छ, जस्तो लाग्छ?</p> <p><i>(प्राप्त उत्तरमा घेरा लाउनुहोस्)</i></p>                                                                                                                                                                                                                     | <table border="1"> <tr><td>1. पर्याप्त</td></tr> <tr><td>2. ठिकै</td></tr> <tr><td>3. थोरै वा कम</td></tr> <tr><td>4. थाहा छैन</td></tr> </table>                                                                                                                                                                                                                                                                                                                                                                                                                                                                                                                                                                                                        | 1. पर्याप्त                           | 2. ठिकै | 3. थोरै वा कम                | 4. थाहा छैन | Ad5                                          |  |                                              |  |                          |  |                                                               |  |                                                              |  |                                                      |  |                                    |  |                            |  |                                                                                         |
|---------------------------------------------------------------|---------------------------------------------------------------------------------------------------------------------------------------------------------------------------------------------------------------------------------------------------------------------------------------------------------------------------------------------|----------------------------------------------------------------------------------------------------------------------------------------------------------------------------------------------------------------------------------------------------------------------------------------------------------------------------------------------------------------------------------------------------------------------------------------------------------------------------------------------------------------------------------------------------------------------------------------------------------------------------------------------------------------------------------------------------------------------------------------------------------|---------------------------------------|---------|------------------------------|-------------|----------------------------------------------|--|----------------------------------------------|--|--------------------------|--|---------------------------------------------------------------|--|--------------------------------------------------------------|--|------------------------------------------------------|--|------------------------------------|--|----------------------------|--|-----------------------------------------------------------------------------------------|
| 1. पर्याप्त                                                   |                                                                                                                                                                                                                                                                                                                                             |                                                                                                                                                                                                                                                                                                                                                                                                                                                                                                                                                                                                                                                                                                                                                          |                                       |         |                              |             |                                              |  |                                              |  |                          |  |                                                               |  |                                                              |  |                                                      |  |                                    |  |                            |  |                                                                                         |
| 2. ठिकै                                                       |                                                                                                                                                                                                                                                                                                                                             |                                                                                                                                                                                                                                                                                                                                                                                                                                                                                                                                                                                                                                                                                                                                                          |                                       |         |                              |             |                                              |  |                                              |  |                          |  |                                                               |  |                                                              |  |                                                      |  |                                    |  |                            |  |                                                                                         |
| 3. थोरै वा कम                                                 |                                                                                                                                                                                                                                                                                                                                             |                                                                                                                                                                                                                                                                                                                                                                                                                                                                                                                                                                                                                                                                                                                                                          |                                       |         |                              |             |                                              |  |                                              |  |                          |  |                                                               |  |                                                              |  |                                                      |  |                                    |  |                            |  |                                                                                         |
| 4. थाहा छैन                                                   |                                                                                                                                                                                                                                                                                                                                             |                                                                                                                                                                                                                                                                                                                                                                                                                                                                                                                                                                                                                                                                                                                                                          |                                       |         |                              |             |                                              |  |                                              |  |                          |  |                                                               |  |                                                              |  |                                                      |  |                                    |  |                            |  |                                                                                         |
| 41.                                                           | <p>के तपाईं स्वस्थकर खानेकुरा सम्बन्धि ज्ञान वा जानकारी पाउने कोशिस गर्नुहुन्छ ? कसरी ?</p> <p><i>(दायाँतिर भएका उत्तरहरु तुरुन्तै नभन्नुस् । प्रश्न सोधेपछि केही समय पर्खनुस् । यदि सहभागीलाई उत्तर भन्न गाह्रो भएमा मात्र उक्त उत्तरहरु पढ्नुहोला ।)</i></p>                                                                              | <ol style="list-style-type: none"> <li>1. गर्छु , जान्नेलाई सोध्नेछु</li> <li>2. गर्छु , त्यसलाई कहीं कतै पढ्नेछु</li> <li>3. अँह, यदि चिकित्सकले (डाक्टर) मलाई केही भन्दैनन् भने, त्यो कुरा महत्वपूर्ण हुँदैन</li> <li>4. अँह, कहाँ खोज्ने वा कस्लाई सोध्ने मलाई थाहा छैन</li> <li>5. त्यो ज्ञान नभए पनि म मरो खानपानको तौरतरिका आफै व्यवस्थापन गर्छु</li> <li>6. अँह, मलाई सबै थाहा छ</li> <li>7. यसको बारेमा पहिले कहिल्यै सोचिन</li> <li>8. अन्य (उल्लेख गर्ने) _____</li> <li>9. थाहा छैन वा भन्न चाहन्न</li> </ol>                                                                                                                                                                                                                                 | Ad6                                   |         |                              |             |                                              |  |                                              |  |                          |  |                                                               |  |                                                              |  |                                                      |  |                                    |  |                            |  |                                                                                         |
| 42.                                                           | <p>के तपाईं आफ्नो परिवारको खानपानको तौरतरिका सुधारन चाहनुहुन्छ ?</p> <p><i>(प्राप्त उत्तरमा घेरा लाउनुहोस्)</i></p>                                                                                                                                                                                                                         | <ol style="list-style-type: none"> <li>1. हो, चाहन्छ _____ <ol style="list-style-type: none"> <li>i. यदि चाहनुहुन्छ भने किन ? _____</li> <li>ii. कस्तो परिवर्तन वा सुधार गर्न चाहनुहुन्छ ? _____</li> </ol> </li> <li>2. अँह, चाहन्न _____ <ol style="list-style-type: none"> <li>i. यदि चाहनुहुन्न भने, किन ? _____</li> </ol> </li> <li>3. थाहा छैन वा भन्न सकिदैन _____</li> </ol>                                                                                                                                                                                                                                                                                                                                                                    | Ad7<br>Ad7.1.i<br>Ad7.1.ii<br>Ad7.2.i |         |                              |             |                                              |  |                                              |  |                          |  |                                                               |  |                                                              |  |                                                      |  |                                    |  |                            |  |                                                                                         |
| 43.                                                           | <p>बढी स्वस्थकर खानेकुरा प्राप्त गर्न वा खानका लागि तपाईंलाई के के कुराहरुले प्रभावित गर्छ ?</p> <p><i>(दायाँतिर भएका प्रत्येक उत्तर पढेर सुनाउनुहोस् र प्रत्येकमा गर्छ/वागर्दैन भनी सोध्नुहोस् । उत्तरदाताबाट आएको उत्तरलाई सगैको बाकसभित्र <b>गर्छ</b> भने "1" तथा <b>गर्दैन</b> भने "0" र <b>थाहा छैन</b> भने "99" लेख्नुहोस् ।)</i></p> | <table border="1"> <thead> <tr> <th>प्रश्न</th> <th>उत्तर</th> </tr> </thead> <tbody> <tr><td>1. आफ्नै स्वास्थ्य खराब भएमा</td><td></td></tr> <tr><td>2. स्वास्थ्यकर्मीको सुझाव तथा सरसल्लाह पाएमा</td><td></td></tr> <tr><td>3. नजिकको नातेदारलाई रोग वा उसको मृत्यु भएमा</td><td></td></tr> <tr><td>4. आफुसँग धेरै पैसा भएमा</td><td></td></tr> <tr><td>5. हाम्रो स्थानीय ठाउँमा स्वस्थ खानेकुराहरु पाइने पसलहरु भएमा</td><td></td></tr> <tr><td>6. परिवारका सदस्यहरुले स्वस्थकर खानेकुरा खाएमा वा खान मानेमा</td><td></td></tr> <tr><td>7. खानेकुरा वा स्वस्थकर खानपानको राम्रो जानकारी भएमा</td><td></td></tr> <tr><td>8. अन्य केही भए उल्लेख गर्ने _____</td><td></td></tr> <tr><td>9. थाहा छैन वा भन्न सकिदैन</td><td></td></tr> </tbody> </table> | प्रश्न                                | उत्तर   | 1. आफ्नै स्वास्थ्य खराब भएमा |             | 2. स्वास्थ्यकर्मीको सुझाव तथा सरसल्लाह पाएमा |  | 3. नजिकको नातेदारलाई रोग वा उसको मृत्यु भएमा |  | 4. आफुसँग धेरै पैसा भएमा |  | 5. हाम्रो स्थानीय ठाउँमा स्वस्थ खानेकुराहरु पाइने पसलहरु भएमा |  | 6. परिवारका सदस्यहरुले स्वस्थकर खानेकुरा खाएमा वा खान मानेमा |  | 7. खानेकुरा वा स्वस्थकर खानपानको राम्रो जानकारी भएमा |  | 8. अन्य केही भए उल्लेख गर्ने _____ |  | 9. थाहा छैन वा भन्न सकिदैन |  | Ad8.1<br>Ad8.2<br>Ad8.3<br>Ad8.4<br>Ad8.5<br>Ad8.6<br>Ad8.7<br>Ad8.8<br>Ad8.9<br>Ad8.10 |
| प्रश्न                                                        | उत्तर                                                                                                                                                                                                                                                                                                                                       |                                                                                                                                                                                                                                                                                                                                                                                                                                                                                                                                                                                                                                                                                                                                                          |                                       |         |                              |             |                                              |  |                                              |  |                          |  |                                                               |  |                                                              |  |                                                      |  |                                    |  |                            |  |                                                                                         |
| 1. आफ्नै स्वास्थ्य खराब भएमा                                  |                                                                                                                                                                                                                                                                                                                                             |                                                                                                                                                                                                                                                                                                                                                                                                                                                                                                                                                                                                                                                                                                                                                          |                                       |         |                              |             |                                              |  |                                              |  |                          |  |                                                               |  |                                                              |  |                                                      |  |                                    |  |                            |  |                                                                                         |
| 2. स्वास्थ्यकर्मीको सुझाव तथा सरसल्लाह पाएमा                  |                                                                                                                                                                                                                                                                                                                                             |                                                                                                                                                                                                                                                                                                                                                                                                                                                                                                                                                                                                                                                                                                                                                          |                                       |         |                              |             |                                              |  |                                              |  |                          |  |                                                               |  |                                                              |  |                                                      |  |                                    |  |                            |  |                                                                                         |
| 3. नजिकको नातेदारलाई रोग वा उसको मृत्यु भएमा                  |                                                                                                                                                                                                                                                                                                                                             |                                                                                                                                                                                                                                                                                                                                                                                                                                                                                                                                                                                                                                                                                                                                                          |                                       |         |                              |             |                                              |  |                                              |  |                          |  |                                                               |  |                                                              |  |                                                      |  |                                    |  |                            |  |                                                                                         |
| 4. आफुसँग धेरै पैसा भएमा                                      |                                                                                                                                                                                                                                                                                                                                             |                                                                                                                                                                                                                                                                                                                                                                                                                                                                                                                                                                                                                                                                                                                                                          |                                       |         |                              |             |                                              |  |                                              |  |                          |  |                                                               |  |                                                              |  |                                                      |  |                                    |  |                            |  |                                                                                         |
| 5. हाम्रो स्थानीय ठाउँमा स्वस्थ खानेकुराहरु पाइने पसलहरु भएमा |                                                                                                                                                                                                                                                                                                                                             |                                                                                                                                                                                                                                                                                                                                                                                                                                                                                                                                                                                                                                                                                                                                                          |                                       |         |                              |             |                                              |  |                                              |  |                          |  |                                                               |  |                                                              |  |                                                      |  |                                    |  |                            |  |                                                                                         |
| 6. परिवारका सदस्यहरुले स्वस्थकर खानेकुरा खाएमा वा खान मानेमा  |                                                                                                                                                                                                                                                                                                                                             |                                                                                                                                                                                                                                                                                                                                                                                                                                                                                                                                                                                                                                                                                                                                                          |                                       |         |                              |             |                                              |  |                                              |  |                          |  |                                                               |  |                                                              |  |                                                      |  |                                    |  |                            |  |                                                                                         |
| 7. खानेकुरा वा स्वस्थकर खानपानको राम्रो जानकारी भएमा          |                                                                                                                                                                                                                                                                                                                                             |                                                                                                                                                                                                                                                                                                                                                                                                                                                                                                                                                                                                                                                                                                                                                          |                                       |         |                              |             |                                              |  |                                              |  |                          |  |                                                               |  |                                                              |  |                                                      |  |                                    |  |                            |  |                                                                                         |
| 8. अन्य केही भए उल्लेख गर्ने _____                            |                                                                                                                                                                                                                                                                                                                                             |                                                                                                                                                                                                                                                                                                                                                                                                                                                                                                                                                                                                                                                                                                                                                          |                                       |         |                              |             |                                              |  |                                              |  |                          |  |                                                               |  |                                                              |  |                                                      |  |                                    |  |                            |  |                                                                                         |
| 9. थाहा छैन वा भन्न सकिदैन                                    |                                                                                                                                                                                                                                                                                                                                             |                                                                                                                                                                                                                                                                                                                                                                                                                                                                                                                                                                                                                                                                                                                                                          |                                       |         |                              |             |                                              |  |                                              |  |                          |  |                                                               |  |                                                              |  |                                                      |  |                                    |  |                            |  |                                                                                         |

| 44.                         | <p>बढी स्वस्थकर वा स्वास्थ्यवर्धक खानेकुरा खान वा उपभोग गर्न तपाईंलाई यी कारणहरूले समस्या वा अप्ठ्याराहरू हुनसक्छ कि सक्दैन?</p> <p>(दायाँतिर भएका प्रत्येक उत्तर पढेर सुनाउनुहोस् र प्रत्येकमा हुनसक्छ वा सक्दैनभनी सोध्नुहोस् । उत्तरदाताबाट आएको उत्तरलाई सँगैको बाकसभित्र हुनसक्छ भने “1” सक्दैन भने “0” र थाहा छैन भने “99” लेख्नुहोस् ।)</p> | <table border="1"> <thead> <tr> <th>प्रश्न</th> <th>उत्तर</th> </tr> </thead> <tbody> <tr> <td>1. स्वस्थ खाना खान कुनै समस्या वा अप्ठ्यारो छैन</td> <td></td> </tr> <tr> <td>2. राम्ररी खाना पकाउनै आउँदैन</td> <td></td> </tr> <tr> <td>3. स्वस्थकर खानेकुराको बारेमा मलाई त्यति जानकारी नै छैन</td> <td></td> </tr> <tr> <td>4. व्यस्त जीवनशैली</td> <td></td> </tr> <tr> <td>5. परिवारका सदस्यहरूको भिन्नभिन्न स्वादको चाहना</td> <td></td> </tr> <tr> <td>6. आफुलाई मनपर्ने खानेकुरा छोड्न चाहन्न वा सक्दिन</td> <td></td> </tr> <tr> <td>7. स्वस्थकर खानेकुरा महँगो भएकोले</td> <td></td> </tr> <tr> <td>8. ईच्छा शक्तिको अभाव</td> <td></td> </tr> <tr> <td>9. अन्य (उल्लेख गर्ने) _____</td> <td></td> </tr> <tr> <td>10. थाहा छैन वा भन्न सक्दिन</td> <td></td> </tr> </tbody> </table> | प्रश्न                                                               | उत्तर | 1. स्वस्थ खाना खान कुनै समस्या वा अप्ठ्यारो छैन |  | 2. राम्ररी खाना पकाउनै आउँदैन |  | 3. स्वस्थकर खानेकुराको बारेमा मलाई त्यति जानकारी नै छैन |  | 4. व्यस्त जीवनशैली |  | 5. परिवारका सदस्यहरूको भिन्नभिन्न स्वादको चाहना |  | 6. आफुलाई मनपर्ने खानेकुरा छोड्न चाहन्न वा सक्दिन |  | 7. स्वस्थकर खानेकुरा महँगो भएकोले |  | 8. ईच्छा शक्तिको अभाव |  | 9. अन्य (उल्लेख गर्ने) _____ |  | 10. थाहा छैन वा भन्न सक्दिन |  | <p>Ad9.1</p> <p>Ad9.2</p> <p>Ad9.3</p> <p>Ad9.4</p> <p>Ad9.5</p> <p>Ad9.6</p> <p>Ad9.7</p> <p>Ad9.8</p> <p>Ad9.9</p> <p>Ad9.10</p> |
|-----------------------------|----------------------------------------------------------------------------------------------------------------------------------------------------------------------------------------------------------------------------------------------------------------------------------------------------------------------------------------------------|-------------------------------------------------------------------------------------------------------------------------------------------------------------------------------------------------------------------------------------------------------------------------------------------------------------------------------------------------------------------------------------------------------------------------------------------------------------------------------------------------------------------------------------------------------------------------------------------------------------------------------------------------------------------------------------------------------------------------------------------------------------------------------------------------|----------------------------------------------------------------------|-------|-------------------------------------------------|--|-------------------------------|--|---------------------------------------------------------|--|--------------------|--|-------------------------------------------------|--|---------------------------------------------------|--|-----------------------------------|--|-----------------------|--|------------------------------|--|-----------------------------|--|------------------------------------------------------------------------------------------------------------------------------------|
|                             |                                                                                                                                                                                                                                                                                                                                                    | प्रश्न                                                                                                                                                                                                                                                                                                                                                                                                                                                                                                                                                                                                                                                                                                                                                                                          | उत्तर                                                                |       |                                                 |  |                               |  |                                                         |  |                    |  |                                                 |  |                                                   |  |                                   |  |                       |  |                              |  |                             |  |                                                                                                                                    |
|                             |                                                                                                                                                                                                                                                                                                                                                    | 1. स्वस्थ खाना खान कुनै समस्या वा अप्ठ्यारो छैन                                                                                                                                                                                                                                                                                                                                                                                                                                                                                                                                                                                                                                                                                                                                                 |                                                                      |       |                                                 |  |                               |  |                                                         |  |                    |  |                                                 |  |                                                   |  |                                   |  |                       |  |                              |  |                             |  |                                                                                                                                    |
|                             |                                                                                                                                                                                                                                                                                                                                                    | 2. राम्ररी खाना पकाउनै आउँदैन                                                                                                                                                                                                                                                                                                                                                                                                                                                                                                                                                                                                                                                                                                                                                                   |                                                                      |       |                                                 |  |                               |  |                                                         |  |                    |  |                                                 |  |                                                   |  |                                   |  |                       |  |                              |  |                             |  |                                                                                                                                    |
|                             |                                                                                                                                                                                                                                                                                                                                                    | 3. स्वस्थकर खानेकुराको बारेमा मलाई त्यति जानकारी नै छैन                                                                                                                                                                                                                                                                                                                                                                                                                                                                                                                                                                                                                                                                                                                                         |                                                                      |       |                                                 |  |                               |  |                                                         |  |                    |  |                                                 |  |                                                   |  |                                   |  |                       |  |                              |  |                             |  |                                                                                                                                    |
|                             |                                                                                                                                                                                                                                                                                                                                                    | 4. व्यस्त जीवनशैली                                                                                                                                                                                                                                                                                                                                                                                                                                                                                                                                                                                                                                                                                                                                                                              |                                                                      |       |                                                 |  |                               |  |                                                         |  |                    |  |                                                 |  |                                                   |  |                                   |  |                       |  |                              |  |                             |  |                                                                                                                                    |
|                             |                                                                                                                                                                                                                                                                                                                                                    | 5. परिवारका सदस्यहरूको भिन्नभिन्न स्वादको चाहना                                                                                                                                                                                                                                                                                                                                                                                                                                                                                                                                                                                                                                                                                                                                                 |                                                                      |       |                                                 |  |                               |  |                                                         |  |                    |  |                                                 |  |                                                   |  |                                   |  |                       |  |                              |  |                             |  |                                                                                                                                    |
|                             |                                                                                                                                                                                                                                                                                                                                                    | 6. आफुलाई मनपर्ने खानेकुरा छोड्न चाहन्न वा सक्दिन                                                                                                                                                                                                                                                                                                                                                                                                                                                                                                                                                                                                                                                                                                                                               |                                                                      |       |                                                 |  |                               |  |                                                         |  |                    |  |                                                 |  |                                                   |  |                                   |  |                       |  |                              |  |                             |  |                                                                                                                                    |
|                             |                                                                                                                                                                                                                                                                                                                                                    | 7. स्वस्थकर खानेकुरा महँगो भएकोले                                                                                                                                                                                                                                                                                                                                                                                                                                                                                                                                                                                                                                                                                                                                                               |                                                                      |       |                                                 |  |                               |  |                                                         |  |                    |  |                                                 |  |                                                   |  |                                   |  |                       |  |                              |  |                             |  |                                                                                                                                    |
|                             |                                                                                                                                                                                                                                                                                                                                                    | 8. ईच्छा शक्तिको अभाव                                                                                                                                                                                                                                                                                                                                                                                                                                                                                                                                                                                                                                                                                                                                                                           |                                                                      |       |                                                 |  |                               |  |                                                         |  |                    |  |                                                 |  |                                                   |  |                                   |  |                       |  |                              |  |                             |  |                                                                                                                                    |
|                             |                                                                                                                                                                                                                                                                                                                                                    | 9. अन्य (उल्लेख गर्ने) _____                                                                                                                                                                                                                                                                                                                                                                                                                                                                                                                                                                                                                                                                                                                                                                    |                                                                      |       |                                                 |  |                               |  |                                                         |  |                    |  |                                                 |  |                                                   |  |                                   |  |                       |  |                              |  |                             |  |                                                                                                                                    |
| 10. थाहा छैन वा भन्न सक्दिन |                                                                                                                                                                                                                                                                                                                                                    |                                                                                                                                                                                                                                                                                                                                                                                                                                                                                                                                                                                                                                                                                                                                                                                                 |                                                                      |       |                                                 |  |                               |  |                                                         |  |                    |  |                                                 |  |                                                   |  |                                   |  |                       |  |                              |  |                             |  |                                                                                                                                    |
| 45.                         | <p>तल राखिएको प्रश्न प्रत्येक (१ देखि ७ वर्ष उमेरका) बच्चाको लागि एक-एक गरी सोध्नुहोला । प्रत्येक बच्चाको उत्तर तल दिइएको बेग्लाबेग्लै कोठामा लेख्नुहोस् ।</p>                                                                                                                                                                                     |                                                                                                                                                                                                                                                                                                                                                                                                                                                                                                                                                                                                                                                                                                                                                                                                 |                                                                      |       |                                                 |  |                               |  |                                                         |  |                    |  |                                                 |  |                                                   |  |                                   |  |                       |  |                              |  |                             |  |                                                                                                                                    |
| बच्चा १                     | <p>के तपाईं आफ्नो बच्चाको खानपानको तौरतरिका बदल्न वा परिवर्तन गर्न चाहनुहुन्छ ?</p> <p>(प्राप्त उत्तरमा घेरा लाउनुहोस्)</p>                                                                                                                                                                                                                        | <p>1. हो, चाहन्छु</p> <p>i. यदि चाहनुहुन्छ भने किन ? _____</p> <p>_____</p> <p>ii. के के कुरा बदल्न वा परिवर्तन गर्न चाहनुहुन्छ ? _____</p> <p>_____</p> <p>2. अँह, चाहन्न</p> <p>i. यदि चाहनुहुन्न भने, किन ? _____</p> <p>_____</p> <p>3. थाहा छैन वा भन्न सक्दिन _____</p>                                                                                                                                                                                                                                                                                                                                                                                                                                                                                                                   | <p>Ad10.1</p> <p>Ad10.1.1.i</p> <p>Ad10.1.1.ii</p> <p>Ad10.1.2.i</p> |       |                                                 |  |                               |  |                                                         |  |                    |  |                                                 |  |                                                   |  |                                   |  |                       |  |                              |  |                             |  |                                                                                                                                    |
| बच्चा २                     | <p>के तपाईं आफ्नो बच्चाको खानपानको तौरतरिका बदल्न वा परिवर्तन गर्न चाहनुहुन्छ ?</p> <p>(प्राप्त उत्तरमा घेरा लाउनुहोस्)</p>                                                                                                                                                                                                                        | <p>1. हो, चाहन्छु</p> <p>i. यदि चाहनुहुन्छ भने किन ? _____</p> <p>_____</p> <p>ii. केके कुरा बदल्न वा परिवर्तन गर्न चाहनुहुन्छ ? _____</p> <p>_____</p> <p>2. अँह, चाहन्न</p> <p>i. यदि चाहनुहुन्न भने, किन ? _____</p> <p>_____</p> <p>3. थाहा छैन वा भन्न सक्दिन _____</p>                                                                                                                                                                                                                                                                                                                                                                                                                                                                                                                    | <p>Ad10.2</p> <p>Ad10.2.1.i</p> <p>Ad10.2.1.ii</p> <p>Ad10.2.2.i</p> |       |                                                 |  |                               |  |                                                         |  |                    |  |                                                 |  |                                                   |  |                                   |  |                       |  |                              |  |                             |  |                                                                                                                                    |
| बच्चा ३                     | <p>के तपाईं आफ्नो बच्चाको खानपानको तौरतरिका बदल्न वा परिवर्तन गर्न चाहनुहुन्छ ?</p> <p>(प्राप्त उत्तरमा घेरा लाउनुहोस्)</p>                                                                                                                                                                                                                        | <p>1. हो, चाहन्छु</p> <p>i. यदि चाहनुहुन्छ भने किन ? _____</p> <p>_____</p> <p>ii. केके कुरा बदल्न वा परिवर्तन गर्न चाहनुहुन्छ ? _____</p> <p>_____</p> <p>2. अँह, चाहन्न</p> <p>i. यदि चाहनुहुन्न भने, किन ? _____</p> <p>_____</p> <p>3. थाहा छैन वा भन्न सक्दिन _____</p>                                                                                                                                                                                                                                                                                                                                                                                                                                                                                                                    | <p>Ad10.3</p> <p>Ad10.3.1.i</p> <p>Ad10.3.1.ii</p> <p>Ad10.3.2.i</p> |       |                                                 |  |                               |  |                                                         |  |                    |  |                                                 |  |                                                   |  |                                   |  |                       |  |                              |  |                             |  |                                                                                                                                    |

|     |                                                                                                                                                                                                                                                                                                                               |                                               |              |        |
|-----|-------------------------------------------------------------------------------------------------------------------------------------------------------------------------------------------------------------------------------------------------------------------------------------------------------------------------------|-----------------------------------------------|--------------|--------|
| 46. | <p>तपाईंको विचारमा, बच्चाको खानेकुराको छनौटमा के कुराले प्रभाव पार्छ ?</p> <p>(दायाँतिर भएका प्रत्येक उत्तर पढेर सुनाउनुहोस् र प्रत्येकमा <b>पार्छ</b> वा <b>पार्दैन</b> भनी सोध्नुहोस् । उत्तरदाताबाट आएको उत्तरलाई सँगैको बाकसभित्र <b>पार्छ</b> भने “1” <b>पार्दैन</b> भने “0” र <b>थाहा छैन</b> भने “99” लेख्नुहोस्।)</p> | <b>प्रश्न</b>                                 | <b>उत्तर</b> |        |
|     |                                                                                                                                                                                                                                                                                                                               | 1. आमाको खानेकुराको चाहना                     |              | Ad11.1 |
|     |                                                                                                                                                                                                                                                                                                                               | 2. परिवारको (आमा बाहेक अन्य) खानेकुराको चाहना |              | Ad11.2 |
|     |                                                                                                                                                                                                                                                                                                                               | 3. विद्यालयमा पढाउने कुरा                     |              | Ad11.3 |
|     |                                                                                                                                                                                                                                                                                                                               | 4. विभिन्न विज्ञापन                           |              | Ad11.4 |
|     |                                                                                                                                                                                                                                                                                                                               | 5. बच्चाको साथी-संगत                          |              | Ad11.5 |
|     |                                                                                                                                                                                                                                                                                                                               | 6. छिमेकीहरु                                  |              | Ad11.6 |
|     |                                                                                                                                                                                                                                                                                                                               | 7. कुनै कुराले प्रभाव पार्दैन                 |              | Ad11.7 |
|     |                                                                                                                                                                                                                                                                                                                               | 8. अन्य (उल्लेख गर्ने) _____                  |              | Ad11.8 |
|     |                                                                                                                                                                                                                                                                                                                               | 9. थाहा छैन वा भन्न सकिदैन                    |              | Ad11.9 |

### B. शारीरिक क्रियाकलाप वा अभ्यास

अब म शारीरिक अभ्यास वा क्रियाकलाप प्रति तपाईंको विचार वा धारणा के छ भनी सोध्नेछु ।

47. अब म शारीरिक अभ्यास वा क्रियाकलापका बारेमा केही भनाइहरु पढेर सुनाउनेछु । यी भनाइहरुमा तपाईंको आफ्नो धारणा राख्नुहोला । तपाईं यसमा पूर्ण सहमत वा अलिअलि सहमत वा अलिअलि असहमत वा पूर्ण असहमत वा थाहा छैन भन्न सक्नुहुनेछ ।  
(उत्तर मिल्ने कोठामा चिन्ह (√) लाउनुहोला तर प्रत्येक भनाइमा एउटा मात्र उत्तर हुनेछ ।)

| Statements<br>भनाइ                                                                                       | A<br>पूर्ण<br>सहमत | B<br>अलिअलि<br>सहमत | C<br>अलिअलि<br>असहमत | D<br>पूर्ण<br>असहमत | E<br>थाहा छैन | कोड   |
|----------------------------------------------------------------------------------------------------------|--------------------|---------------------|----------------------|---------------------|---------------|-------|
| 47.1 शारीरिक क्रियाकलाप रमाइलो कार्य हो ।                                                                |                    |                     |                      |                     |               | Ap1.1 |
| 47.2 वयस्क-मानिसहरुका लागि शारीरिक क्रियाकलाप महत्वपूर्ण हुँदैन ।                                        |                    |                     |                      |                     |               | Ap1.2 |
| 47.3 कम शारीरिक क्रियाकलाप वा अभ्यास बढी वजन तथा मोटोपनासँग सम्बन्ध राख्दछ ।                             |                    |                     |                      |                     |               | Ap1.3 |
| 47.4 जसले थोरै खान्छ उसले, शारीरिक रुपमा त्यति सक्रिय भइरहनु आवश्यक छैन ।                                |                    |                     |                      |                     |               | Ap1.4 |
| 47.5 धेरै शारीरिक क्रियाकलाप वा अभ्यास गर्न हुँदैन किन कि यसले भोक पनि बढाउँछ र त्यसपछि तौल पनि बढाउँछ । |                    |                     |                      |                     |               | Ap1.5 |
| 47.6 मुटुको रोग छ भन्ने पत्ता लागेपछि, आफ्नो शारीरिक अभ्यास रोक्नुपर्छ ।                                 |                    |                     |                      |                     |               | Ap1.6 |
| 47.7 बढी वजनदार व्यक्तिहरु बढी आकर्षक हुन्छन् ।                                                          |                    |                     |                      |                     |               | Ap1.7 |
| 47.8 शारीरिक क्रियाकलाप बालबालिकाकास्वास्थ्यका लागि महत्वपूर्ण हुन्छ ।                                   |                    |                     |                      |                     |               | Ap1.8 |
| 47.9 बढी वजन भएका बालबालिकाहरु आकर्षक हुन्छन् ।                                                          |                    |                     |                      |                     |               | Ap1.9 |

|       |                                                                                                         |  |  |  |  |  |        |
|-------|---------------------------------------------------------------------------------------------------------|--|--|--|--|--|--------|
| 47.10 | बढी वजन भएका बालबालिकाहरु स्वस्थ हुन्छन्                                                                |  |  |  |  |  | Ap1.10 |
| 47.11 | बच्चालाई आवश्यक शारीरिक अभ्यास वा क्रियाकलापका लागि विद्यालय पनि जिम्मेवार हुन्छ                        |  |  |  |  |  | Ap1.11 |
| 47.12 | सुरक्षाको दृष्टिले, बच्चालाई बाहिर खेलबाट रोक्नुपर्छ ।                                                  |  |  |  |  |  | Ap1.12 |
| 47.13 | आफना बालबालिकाको आवश्यक शारीरिक अभ्यास वा क्रियाकलापका लागि अभिभावकहरु नै मुख्य जिम्मेवार हुन्छन् ।     |  |  |  |  |  | Ap1.13 |
| 47.14 | बालबालिकाले प्रयोग गर्ने टेलिभिजन, कम्प्युटर र अन्य विद्युतीय खेलको प्रयोगमा अभिभावकले रोक लगाउनुपर्छ । |  |  |  |  |  | Ap1.14 |

**अब म तपाईंहरुलाई शारीरिक अभ्यास वा क्रियाकलापहरु प्रति तपाईंको धारणा सोध्नेछु ।**

| क्र.सं.                            | प्रश्नहरु                                                                                                                                                                                                                       | उत्तर                                                                                                                                                                                                                                                                                                                                                                                                                                                     | कोड                                                                                 |                           |                           |                           |                                    |                                   |                         |                              |                  |                         |                              |  |                            |  |                                                    |
|------------------------------------|---------------------------------------------------------------------------------------------------------------------------------------------------------------------------------------------------------------------------------|-----------------------------------------------------------------------------------------------------------------------------------------------------------------------------------------------------------------------------------------------------------------------------------------------------------------------------------------------------------------------------------------------------------------------------------------------------------|-------------------------------------------------------------------------------------|---------------------------|---------------------------|---------------------------|------------------------------------|-----------------------------------|-------------------------|------------------------------|------------------|-------------------------|------------------------------|--|----------------------------|--|----------------------------------------------------|
| 48.                                | यदि कुनै ठाउँमा तपाईंलाई पुग्नु छ र त्यो ठाउँ २०-२५ मिनेटको पैदल दुरीमा छ भने, तपाईं प्राय कसरी जान मन पराउनुहुन्छ ?                                                                                                            | <ol style="list-style-type: none"> <li>साइकलबाट</li> <li>आफ्नै सवारी साधनबाट</li> <li>पैदल वा हिंडुदै</li> <li>बसबाट</li> <li>त्यति टाढा म जान्न</li> <li>अन्य (उल्लेख गर्ने) _____</li> <li>थाहा छैन वा भन्न सकिदैन</li> </ol>                                                                                                                                                                                                                           |  | Ap2                       |                           |                           |                                    |                                   |                         |                              |                  |                         |                              |  |                            |  |                                                    |
| 49.                                | तपाईंको आफ्नो शारीरिक क्रियाकलाप वा अभ्यासलाई कुन स्तरको मान्नुहुन्छ?                                                                                                                                                           | <table border="1"> <tr> <td>1.</td> <td>शारीरिक रुपमा धेरै सक्रिय</td> </tr> <tr> <td>2.</td> <td>शारीरिक रुपमा ठीकै सक्रिय</td> </tr> <tr> <td>3.</td> <td>शारीरिक रुपमा धेरै सक्रिय मान्दिन</td> </tr> <tr> <td>4.</td> <td>शारीरिक रुपमा सक्रिय मान्दिन</td> </tr> <tr> <td>5.</td> <td>थाहा छैन वा भन्न सकिदैन</td> </tr> </table> <p>यदि उत्तर 1 वा 2 भएमा, प्रश्न नं. 50 मा जाने<br/>यदि उत्तर 3, 4 वा 5 भएमा, प्रश्न नं. 51 मा जाने</p>            | 1.                                                                                  | शारीरिक रुपमा धेरै सक्रिय | 2.                        | शारीरिक रुपमा ठीकै सक्रिय | 3.                                 | शारीरिक रुपमा धेरै सक्रिय मान्दिन | 4.                      | शारीरिक रुपमा सक्रिय मान्दिन | 5.               | थाहा छैन वा भन्न सकिदैन | Ap3                          |  |                            |  |                                                    |
| 1.                                 | शारीरिक रुपमा धेरै सक्रिय                                                                                                                                                                                                       |                                                                                                                                                                                                                                                                                                                                                                                                                                                           |                                                                                     |                           |                           |                           |                                    |                                   |                         |                              |                  |                         |                              |  |                            |  |                                                    |
| 2.                                 | शारीरिक रुपमा ठीकै सक्रिय                                                                                                                                                                                                       |                                                                                                                                                                                                                                                                                                                                                                                                                                                           |                                                                                     |                           |                           |                           |                                    |                                   |                         |                              |                  |                         |                              |  |                            |  |                                                    |
| 3.                                 | शारीरिक रुपमा धेरै सक्रिय मान्दिन                                                                                                                                                                                               |                                                                                                                                                                                                                                                                                                                                                                                                                                                           |                                                                                     |                           |                           |                           |                                    |                                   |                         |                              |                  |                         |                              |  |                            |  |                                                    |
| 4.                                 | शारीरिक रुपमा सक्रिय मान्दिन                                                                                                                                                                                                    |                                                                                                                                                                                                                                                                                                                                                                                                                                                           |                                                                                     |                           |                           |                           |                                    |                                   |                         |                              |                  |                         |                              |  |                            |  |                                                    |
| 5.                                 | थाहा छैन वा भन्न सकिदैन                                                                                                                                                                                                         |                                                                                                                                                                                                                                                                                                                                                                                                                                                           |                                                                                     |                           |                           |                           |                                    |                                   |                         |                              |                  |                         |                              |  |                            |  |                                                    |
| 50.                                | तपाईं आफु किन शारीरिक रुपमा सक्रिय हुनुहुन्छ ?<br>(बहु-उत्तर प्रश्न)<br>(दायाँतिर भएका उत्तरहरु तुरुन्तै नभन्नुस् । प्रश्न सोधेपछि केही समय पर्खनुस् । यदि सहभागीले कुनैपनि उत्तर भन्न सकेन भने मात्र उक्त उत्तरहरु पढनुहोला ।) | <table border="1"> <thead> <tr> <th>प्रश्न</th> <th>उत्तर</th> </tr> </thead> <tbody> <tr> <td>1. स्वास्थ्य राम्रो राख्न</td> <td></td> </tr> <tr> <td>2. मेरो दैनिक कर्तव्य वा दैनिकी हो</td> <td></td> </tr> <tr> <td>3. आफु चुस्तदुरुस्त हुन</td> <td></td> </tr> <tr> <td>4. आफ्नो पेशा हो</td> <td></td> </tr> <tr> <td>5. अन्य (उल्लेख गर्ने) _____</td> <td></td> </tr> <tr> <td>6. थाहा छैन वा भन्न सकिदैन</td> <td></td> </tr> </tbody> </table> | प्रश्न                                                                              | उत्तर                     | 1. स्वास्थ्य राम्रो राख्न |                           | 2. मेरो दैनिक कर्तव्य वा दैनिकी हो |                                   | 3. आफु चुस्तदुरुस्त हुन |                              | 4. आफ्नो पेशा हो |                         | 5. अन्य (उल्लेख गर्ने) _____ |  | 6. थाहा छैन वा भन्न सकिदैन |  | Ap4.1<br>Ap4.2<br>Ap4.3<br>Ap4.4<br>Ap4.5<br>Ap4.6 |
| प्रश्न                             | उत्तर                                                                                                                                                                                                                           |                                                                                                                                                                                                                                                                                                                                                                                                                                                           |                                                                                     |                           |                           |                           |                                    |                                   |                         |                              |                  |                         |                              |  |                            |  |                                                    |
| 1. स्वास्थ्य राम्रो राख्न          |                                                                                                                                                                                                                                 |                                                                                                                                                                                                                                                                                                                                                                                                                                                           |                                                                                     |                           |                           |                           |                                    |                                   |                         |                              |                  |                         |                              |  |                            |  |                                                    |
| 2. मेरो दैनिक कर्तव्य वा दैनिकी हो |                                                                                                                                                                                                                                 |                                                                                                                                                                                                                                                                                                                                                                                                                                                           |                                                                                     |                           |                           |                           |                                    |                                   |                         |                              |                  |                         |                              |  |                            |  |                                                    |
| 3. आफु चुस्तदुरुस्त हुन            |                                                                                                                                                                                                                                 |                                                                                                                                                                                                                                                                                                                                                                                                                                                           |                                                                                     |                           |                           |                           |                                    |                                   |                         |                              |                  |                         |                              |  |                            |  |                                                    |
| 4. आफ्नो पेशा हो                   |                                                                                                                                                                                                                                 |                                                                                                                                                                                                                                                                                                                                                                                                                                                           |                                                                                     |                           |                           |                           |                                    |                                   |                         |                              |                  |                         |                              |  |                            |  |                                                    |
| 5. अन्य (उल्लेख गर्ने) _____       |                                                                                                                                                                                                                                 |                                                                                                                                                                                                                                                                                                                                                                                                                                                           |                                                                                     |                           |                           |                           |                                    |                                   |                         |                              |                  |                         |                              |  |                            |  |                                                    |
| 6. थाहा छैन वा भन्न सकिदैन         |                                                                                                                                                                                                                                 |                                                                                                                                                                                                                                                                                                                                                                                                                                                           |                                                                                     |                           |                           |                           |                                    |                                   |                         |                              |                  |                         |                              |  |                            |  |                                                    |

|     |                                                                                  |                                                                                                                                                                                                                                        |                                                                 |
|-----|----------------------------------------------------------------------------------|----------------------------------------------------------------------------------------------------------------------------------------------------------------------------------------------------------------------------------------|-----------------------------------------------------------------|
| 51. | <p>तपाई आफ्नो शारीरिक क्रियाकलाप वा अभ्यास बदल वा परिवर्तन गर्न चाहनुहुन्छ ?</p> | <p>1. हो, चाहन्छु<br/> i. यदि चाहनुहुन्छ भने, किन ?<br/> _____</p> <p>ii. केकस्तो परिवर्तन गर्न चाहनुहुन्छ ?<br/> _____</p> <p>2. अँह, चाहन्न<br/> i. यदि चाहनुहुन्न भने, किन ?<br/> _____</p> <p>3. थाहा छैन वा भन्न सकिदैन _____</p> | <p>Ap5<br/> Ap5.1.i<br/> Ap5.1.ii</p> <p>Ap5.2.i<br/> Ap5.3</p> |
|-----|----------------------------------------------------------------------------------|----------------------------------------------------------------------------------------------------------------------------------------------------------------------------------------------------------------------------------------|-----------------------------------------------------------------|

| 52.                                               | <p>शारीरिक अभ्यास वा क्रियाकलापमा अझ बढि सक्रिय हुनका लागि के कस्ता कुराले तपाईलाई अवरोध गर्नसक्छ ?</p> <p>(दायाँतिर भएका प्रत्येक उत्तर पढेर सुनाउनुहोस् र प्रत्येकले अवरोध गर्नसक्छ वा गर्न सक्दैन भनी सोध्नुहोस् । उत्तरदाताबाट आएको उत्तरलाई सँगैको बाकस भित्र <b>गर्नसक्छ</b> भने “1”<b>गर्न सक्दैन</b> भने “0”<b>र थाहा छैन</b> भने “99” लेख्नुहोस्।)</p> | <table border="1"> <thead> <tr> <th>प्रश्न</th> <th>उत्तर</th> </tr> </thead> <tbody> <tr> <td>1. फुर्सदको समय नभएमा</td> <td></td> </tr> <tr> <td>2. बालबच्चा वा बुढाबुढीको स्याहार गर्नुपर्ने भएमा</td> <td></td> </tr> <tr> <td>3. शारीरिक अभ्यास गर्ने मैदान वा ठाउँको अभाव भएमा</td> <td></td> </tr> <tr> <td>4. अन्य कामहरु गर्नुपर्ने भएमा</td> <td></td> </tr> <tr> <td>5. आफ्नो स्वास्थ्यखराब भएमा</td> <td></td> </tr> <tr> <td>6. अल्छी लाग्ने बानीले गर्दा</td> <td></td> </tr> <tr> <td>7. अरुको अगाडि अप्प्यारो लाग्ने भएकोले</td> <td></td> </tr> <tr> <td>8. अन्य (उल्लेख गर्ने) _____</td> <td></td> </tr> </tbody> </table> | प्रश्न | उत्तर | 1. फुर्सदको समय नभएमा |  | 2. बालबच्चा वा बुढाबुढीको स्याहार गर्नुपर्ने भएमा |  | 3. शारीरिक अभ्यास गर्ने मैदान वा ठाउँको अभाव भएमा |  | 4. अन्य कामहरु गर्नुपर्ने भएमा |  | 5. आफ्नो स्वास्थ्यखराब भएमा |  | 6. अल्छी लाग्ने बानीले गर्दा |  | 7. अरुको अगाडि अप्प्यारो लाग्ने भएकोले |  | 8. अन्य (उल्लेख गर्ने) _____ |  | <p>Ap6.1<br/> Ap6.2<br/> Ap6.3<br/> Ap6.4<br/> Ap6.5<br/> Ap6.6<br/> Ap6.7<br/> Ap6.8</p> |
|---------------------------------------------------|-----------------------------------------------------------------------------------------------------------------------------------------------------------------------------------------------------------------------------------------------------------------------------------------------------------------------------------------------------------------|-----------------------------------------------------------------------------------------------------------------------------------------------------------------------------------------------------------------------------------------------------------------------------------------------------------------------------------------------------------------------------------------------------------------------------------------------------------------------------------------------------------------------------------------------------------------------------------------------------------------------------------------------|--------|-------|-----------------------|--|---------------------------------------------------|--|---------------------------------------------------|--|--------------------------------|--|-----------------------------|--|------------------------------|--|----------------------------------------|--|------------------------------|--|-------------------------------------------------------------------------------------------|
| प्रश्न                                            | उत्तर                                                                                                                                                                                                                                                                                                                                                           |                                                                                                                                                                                                                                                                                                                                                                                                                                                                                                                                                                                                                                               |        |       |                       |  |                                                   |  |                                                   |  |                                |  |                             |  |                              |  |                                        |  |                              |  |                                                                                           |
| 1. फुर्सदको समय नभएमा                             |                                                                                                                                                                                                                                                                                                                                                                 |                                                                                                                                                                                                                                                                                                                                                                                                                                                                                                                                                                                                                                               |        |       |                       |  |                                                   |  |                                                   |  |                                |  |                             |  |                              |  |                                        |  |                              |  |                                                                                           |
| 2. बालबच्चा वा बुढाबुढीको स्याहार गर्नुपर्ने भएमा |                                                                                                                                                                                                                                                                                                                                                                 |                                                                                                                                                                                                                                                                                                                                                                                                                                                                                                                                                                                                                                               |        |       |                       |  |                                                   |  |                                                   |  |                                |  |                             |  |                              |  |                                        |  |                              |  |                                                                                           |
| 3. शारीरिक अभ्यास गर्ने मैदान वा ठाउँको अभाव भएमा |                                                                                                                                                                                                                                                                                                                                                                 |                                                                                                                                                                                                                                                                                                                                                                                                                                                                                                                                                                                                                                               |        |       |                       |  |                                                   |  |                                                   |  |                                |  |                             |  |                              |  |                                        |  |                              |  |                                                                                           |
| 4. अन्य कामहरु गर्नुपर्ने भएमा                    |                                                                                                                                                                                                                                                                                                                                                                 |                                                                                                                                                                                                                                                                                                                                                                                                                                                                                                                                                                                                                                               |        |       |                       |  |                                                   |  |                                                   |  |                                |  |                             |  |                              |  |                                        |  |                              |  |                                                                                           |
| 5. आफ्नो स्वास्थ्यखराब भएमा                       |                                                                                                                                                                                                                                                                                                                                                                 |                                                                                                                                                                                                                                                                                                                                                                                                                                                                                                                                                                                                                                               |        |       |                       |  |                                                   |  |                                                   |  |                                |  |                             |  |                              |  |                                        |  |                              |  |                                                                                           |
| 6. अल्छी लाग्ने बानीले गर्दा                      |                                                                                                                                                                                                                                                                                                                                                                 |                                                                                                                                                                                                                                                                                                                                                                                                                                                                                                                                                                                                                                               |        |       |                       |  |                                                   |  |                                                   |  |                                |  |                             |  |                              |  |                                        |  |                              |  |                                                                                           |
| 7. अरुको अगाडि अप्प्यारो लाग्ने भएकोले            |                                                                                                                                                                                                                                                                                                                                                                 |                                                                                                                                                                                                                                                                                                                                                                                                                                                                                                                                                                                                                                               |        |       |                       |  |                                                   |  |                                                   |  |                                |  |                             |  |                              |  |                                        |  |                              |  |                                                                                           |
| 8. अन्य (उल्लेख गर्ने) _____                      |                                                                                                                                                                                                                                                                                                                                                                 |                                                                                                                                                                                                                                                                                                                                                                                                                                                                                                                                                                                                                                               |        |       |                       |  |                                                   |  |                                                   |  |                                |  |                             |  |                              |  |                                        |  |                              |  |                                                                                           |

| 53.                                                          | <p>शारीरिक रुपमा अझ बढि सक्रिय हुन केकस्ता कुराहरु (तत्वहरु) ले तपाईलाई मद्दत गर्छ ?</p> <p>(दायाँतिर भएका प्रत्येक उत्तर पढेर सुनाउनुहोस् र प्रत्येकले मद्दत गर्छ वा गर्दैन भनी सोध्नुहोस् । उत्तरदाताबाट आएको उत्तरलाई सँगैको बाकस भित्र <b>गर्छ</b> भने “1”<b>गर्दैन</b> भने “0”<b>र थाहा छैन</b> भने “99” लेख्नुहोस्।)</p> | <table border="1"> <thead> <tr> <th>प्रश्न</th> <th>उत्तर</th> </tr> </thead> <tbody> <tr> <td>1. आफ्नै स्वास्थ्यखराब भएमा</td> <td></td> </tr> <tr> <td>2. स्वास्थ्यकर्मी को सुझाव वा सल्लाहपाएमा</td> <td></td> </tr> <tr> <td>3. साथी वा नातेदारको सहयोग पाएमा</td> <td></td> </tr> <tr> <td>4. शारीरिक अभ्यास वा क्रियाकलापका बारेमा राम्रो जानकारी भएमा</td> <td></td> </tr> <tr> <td>5. अभ्यासका लागि उपयुक्त ठाउँ भएमा</td> <td></td> </tr> <tr> <td>6. अन्य (उल्लेख गर्ने) _____</td> <td></td> </tr> </tbody> </table> | प्रश्न | उत्तर | 1. आफ्नै स्वास्थ्यखराब भएमा |  | 2. स्वास्थ्यकर्मी को सुझाव वा सल्लाहपाएमा |  | 3. साथी वा नातेदारको सहयोग पाएमा |  | 4. शारीरिक अभ्यास वा क्रियाकलापका बारेमा राम्रो जानकारी भएमा |  | 5. अभ्यासका लागि उपयुक्त ठाउँ भएमा |  | 6. अन्य (उल्लेख गर्ने) _____ |  | <p>Ap7.1<br/> Ap7.2<br/> Ap7.3<br/> Ap7.4<br/> Ap7.5<br/> Ap7.6<br/> Ap7.7</p> |
|--------------------------------------------------------------|--------------------------------------------------------------------------------------------------------------------------------------------------------------------------------------------------------------------------------------------------------------------------------------------------------------------------------|---------------------------------------------------------------------------------------------------------------------------------------------------------------------------------------------------------------------------------------------------------------------------------------------------------------------------------------------------------------------------------------------------------------------------------------------------------------------------------------------------------------------------------|--------|-------|-----------------------------|--|-------------------------------------------|--|----------------------------------|--|--------------------------------------------------------------|--|------------------------------------|--|------------------------------|--|--------------------------------------------------------------------------------|
| प्रश्न                                                       | उत्तर                                                                                                                                                                                                                                                                                                                          |                                                                                                                                                                                                                                                                                                                                                                                                                                                                                                                                 |        |       |                             |  |                                           |  |                                  |  |                                                              |  |                                    |  |                              |  |                                                                                |
| 1. आफ्नै स्वास्थ्यखराब भएमा                                  |                                                                                                                                                                                                                                                                                                                                |                                                                                                                                                                                                                                                                                                                                                                                                                                                                                                                                 |        |       |                             |  |                                           |  |                                  |  |                                                              |  |                                    |  |                              |  |                                                                                |
| 2. स्वास्थ्यकर्मी को सुझाव वा सल्लाहपाएमा                    |                                                                                                                                                                                                                                                                                                                                |                                                                                                                                                                                                                                                                                                                                                                                                                                                                                                                                 |        |       |                             |  |                                           |  |                                  |  |                                                              |  |                                    |  |                              |  |                                                                                |
| 3. साथी वा नातेदारको सहयोग पाएमा                             |                                                                                                                                                                                                                                                                                                                                |                                                                                                                                                                                                                                                                                                                                                                                                                                                                                                                                 |        |       |                             |  |                                           |  |                                  |  |                                                              |  |                                    |  |                              |  |                                                                                |
| 4. शारीरिक अभ्यास वा क्रियाकलापका बारेमा राम्रो जानकारी भएमा |                                                                                                                                                                                                                                                                                                                                |                                                                                                                                                                                                                                                                                                                                                                                                                                                                                                                                 |        |       |                             |  |                                           |  |                                  |  |                                                              |  |                                    |  |                              |  |                                                                                |
| 5. अभ्यासका लागि उपयुक्त ठाउँ भएमा                           |                                                                                                                                                                                                                                                                                                                                |                                                                                                                                                                                                                                                                                                                                                                                                                                                                                                                                 |        |       |                             |  |                                           |  |                                  |  |                                                              |  |                                    |  |                              |  |                                                                                |
| 6. अन्य (उल्लेख गर्ने) _____                                 |                                                                                                                                                                                                                                                                                                                                |                                                                                                                                                                                                                                                                                                                                                                                                                                                                                                                                 |        |       |                             |  |                                           |  |                                  |  |                                                              |  |                                    |  |                              |  |                                                                                |

अब म तपाईका बालबालिकाहरु (बच्चाहरु)को शारीरिक अभ्यास वा क्रियाकलापहरु प्रति तपाईको धारणा सोध्नेछु ।

यदि सहभागी (उत्तरदाता)को एकभन्दा बढी १ देखि ७ वर्षका बालबालिका छन् भने प्रत्येकलाई बेगलाबेगलै नम्बर दिई राख्ने जस्तै १, २, ३ आदि (बढीमा ३ जनाको मात्र) र प्रत्येक बच्चाको जानकारी वा उसकै नाम भएको छेउमा लेख्ने । प्रत्येक प्रश्नको उत्तरमा “√” चिन्ह लगाउनुहोस् ।

| 54.                               | <p>तपाईको आफ्नो बच्चाको शारीरिक क्रियाकलाप वा अभ्यासलाई कुन स्तरको मान्नुहुन्छ ?</p> <p>(सहभागी-उत्तरदातालाई आफ्नो १ देखि ७ वर्ष उमेरका प्रत्येक बच्चाको शारीरिक अभ्यासको मुल्यांकन छुट्टा छुट्टै गर्न भन्नुहोस्)</p> | <table border="1"> <thead> <tr> <th>प्रश्न</th> <th>बच्चा १</th> <th>बच्चा २</th> <th>बच्चा ३</th> </tr> </thead> <tbody> <tr> <td>1. शारीरिक रुपमा धेरै सक्रिय</td> <td></td> <td></td> <td></td> </tr> <tr> <td>2. शारीरिक रुपमा ठीकै सक्रिय</td> <td></td> <td></td> <td></td> </tr> <tr> <td>3. शारीरिक रुपमा धेरै सक्रिय छैन</td> <td></td> <td></td> <td></td> </tr> <tr> <td>4. शारीरिक रुपमा पटककै सक्रिय छैन</td> <td></td> <td></td> <td></td> </tr> <tr> <td>5. थाहा छैन वा भन्न सकिदैन</td> <td></td> <td></td> <td></td> </tr> </tbody> </table> | प्रश्न  | बच्चा १ | बच्चा २ | बच्चा ३ | 1. शारीरिक रुपमा धेरै सक्रिय |  |  |  | 2. शारीरिक रुपमा ठीकै सक्रिय |  |  |  | 3. शारीरिक रुपमा धेरै सक्रिय छैन |  |  |  | 4. शारीरिक रुपमा पटककै सक्रिय छैन |  |  |  | 5. थाहा छैन वा भन्न सकिदैन |  |  |  | <p>Ap8.1<br/> Ap8.2<br/> Ap8.3</p> |
|-----------------------------------|-----------------------------------------------------------------------------------------------------------------------------------------------------------------------------------------------------------------------|---------------------------------------------------------------------------------------------------------------------------------------------------------------------------------------------------------------------------------------------------------------------------------------------------------------------------------------------------------------------------------------------------------------------------------------------------------------------------------------------------------------------------------------------------------------|---------|---------|---------|---------|------------------------------|--|--|--|------------------------------|--|--|--|----------------------------------|--|--|--|-----------------------------------|--|--|--|----------------------------|--|--|--|------------------------------------|
| प्रश्न                            | बच्चा १                                                                                                                                                                                                               | बच्चा २                                                                                                                                                                                                                                                                                                                                                                                                                                                                                                                                                       | बच्चा ३ |         |         |         |                              |  |  |  |                              |  |  |  |                                  |  |  |  |                                   |  |  |  |                            |  |  |  |                                    |
| 1. शारीरिक रुपमा धेरै सक्रिय      |                                                                                                                                                                                                                       |                                                                                                                                                                                                                                                                                                                                                                                                                                                                                                                                                               |         |         |         |         |                              |  |  |  |                              |  |  |  |                                  |  |  |  |                                   |  |  |  |                            |  |  |  |                                    |
| 2. शारीरिक रुपमा ठीकै सक्रिय      |                                                                                                                                                                                                                       |                                                                                                                                                                                                                                                                                                                                                                                                                                                                                                                                                               |         |         |         |         |                              |  |  |  |                              |  |  |  |                                  |  |  |  |                                   |  |  |  |                            |  |  |  |                                    |
| 3. शारीरिक रुपमा धेरै सक्रिय छैन  |                                                                                                                                                                                                                       |                                                                                                                                                                                                                                                                                                                                                                                                                                                                                                                                                               |         |         |         |         |                              |  |  |  |                              |  |  |  |                                  |  |  |  |                                   |  |  |  |                            |  |  |  |                                    |
| 4. शारीरिक रुपमा पटककै सक्रिय छैन |                                                                                                                                                                                                                       |                                                                                                                                                                                                                                                                                                                                                                                                                                                                                                                                                               |         |         |         |         |                              |  |  |  |                              |  |  |  |                                  |  |  |  |                                   |  |  |  |                            |  |  |  |                                    |
| 5. थाहा छैन वा भन्न सकिदैन        |                                                                                                                                                                                                                       |                                                                                                                                                                                                                                                                                                                                                                                                                                                                                                                                                               |         |         |         |         |                              |  |  |  |                              |  |  |  |                                  |  |  |  |                                   |  |  |  |                            |  |  |  |                                    |



|     |                                                                                                          |                            |         |         |         |                            |
|-----|----------------------------------------------------------------------------------------------------------|----------------------------|---------|---------|---------|----------------------------|
| 58. | के तपाईं आफ्नो बच्चाको शारीरिक क्रियाकलाप वा अभ्यासमा प्रभाव पार्न सक्नु हुन्छ, जस्तो लाग्छ कि लाग्दैन ? | प्रश्न                     | बच्चा १ | बच्चा २ | बच्चा ३ | Ap12.1<br>Ap11.2<br>Ap11.3 |
|     |                                                                                                          | 1. सक्छु                   |         |         |         |                            |
|     |                                                                                                          | 2. सकिदैन                  |         |         |         |                            |
|     |                                                                                                          | 3. थाहा छैन वा भन्न सकिदैन |         |         |         |                            |

## V. आमा तथा बालबालिकाको व्यवहार

### A. पारिवारिक खानपानको तौरतरिका

अब म तपाईंको परिवारको खानपानको तौरतरिकाको बारेमा सोध्नेछु ।

| क्र.सं. | प्रश्नहरू                                                                                                                                                                                                                                                          | उत्तर                                                                                                                                                                                                                                                      | कोड                             |
|---------|--------------------------------------------------------------------------------------------------------------------------------------------------------------------------------------------------------------------------------------------------------------------|------------------------------------------------------------------------------------------------------------------------------------------------------------------------------------------------------------------------------------------------------------|---------------------------------|
| 59.     | तपाईंको परिवारमा धेरैजसो कसले खाना पकाउने काम गर्छ ?<br><i>(दायाँतिर भएका उत्तरहरू तुरुन्तै नभन्नुस् । प्रश्न सोधेपछि केही समय पर्खनुस् । यदि सहभागीलाई उत्तर भन्न गाह्रो भएमा मात्र उक्त उत्तरहरू पढ्नुहोला ।)</i>                                                | <ol style="list-style-type: none"> <li>म आफैं</li> <li>मेरो श्रीमान् (पति)</li> <li>सासू / आमा</li> <li>ससूरा / बुबा</li> <li>कामगर्ने मान्छे (सहयोगी)</li> <li>अन्य (उल्लेख गर्ने) _____</li> </ol>                                                       | <input type="checkbox"/><br>Bd1 |
| 60.     | तपाईंको परिवारमा खाना के, कस्तो र कसरी पकाउने कुराको निर्णय कसले गर्छ?<br><i>(दायाँतिर भएका उत्तरहरू तुरुन्तै नभन्नुस् । प्रश्न सोधेपछि केही समय पर्खनुस् । यदि सहभागीलाई उत्तर भन्न गाह्रो भएमा मात्र उक्त उत्तरहरू पढ्नुहोला ।)</i>                              | <ol style="list-style-type: none"> <li>म आफैं</li> <li>मेरो श्रीमान् (पति)</li> <li>सासू / आमा</li> <li>ससूरा / बुबा</li> <li>कामगर्ने मान्छे (सहयोगी)</li> <li>बालबच्चाले</li> <li>हामी सबैले</li> <li>अन्य (उल्लेख गर्ने) _____</li> </ol>               | <input type="checkbox"/><br>Bd2 |
| 61.     | तपाईंको परिवारका हरेक सदस्यहरू सगैँ कत्तिको घरबाहिर खाना खाने गर्छन्?<br><i>(दायाँतिर भएका उत्तरहरू तुरुन्तै नभन्नुस् । प्रश्न सोधेपछि केही समय पर्खनुस् । यदि सहभागीलाई उत्तर भन्न गाह्रो भएमा मात्र उक्त उत्तरहरू पढ्नुहोला ।)</i>                               | <ol style="list-style-type: none"> <li>हरेक दिन</li> <li>एक दिन बिराएर</li> <li>हप्ता वा साताको एकपटक</li> <li>एक महिनामा एकपटक</li> <li>कहिल्यै घरबाहिर खाँदैनौं</li> <li>अन्य (उल्लेख गर्ने) _____</li> <li>थाहा छैन वा भन्न सकिदैन</li> </ol>           | <input type="checkbox"/><br>Bd3 |
| 62.     | के तपाईंहरू सप्ताहको अन्त्यमा जस्तै शनिवार, अन्य दिनको भन्दा फरक वा बेग्लै तरिकाले खानुहुन्छ? कसरी?<br><i>(दायाँतिर भएका उत्तरहरू तुरुन्तै नभन्नुस् । प्रश्न सोधेपछि केही समय पर्खनुस् । यदि सहभागीलाई उत्तर भन्न गाह्रो भएमा मात्र उक्त उत्तरहरू पढ्नुहोला ।)</i> | <ol style="list-style-type: none"> <li>अरु दिन खाए जस्तै</li> <li>विशेष खाना पाक्छ</li> <li>नातेदार वा साथीको घरमा खान जान्छौं</li> <li>बाहिर (होटल, रेष्टुराँ) खान जान्छौं</li> <li>अन्य (उल्लेख गर्ने) _____</li> <li>थाहा छैन वा भन्न सकिदैन</li> </ol> | <input type="checkbox"/><br>Bd4 |



|     |                                                                                                                                                                                                                                        |                                                                                                                                                                                                                                                                                                     |                          |     |
|-----|----------------------------------------------------------------------------------------------------------------------------------------------------------------------------------------------------------------------------------------|-----------------------------------------------------------------------------------------------------------------------------------------------------------------------------------------------------------------------------------------------------------------------------------------------------|--------------------------|-----|
| 63. | तपाईंको घरमा, खाना खाने समयमा गुलियो पेयपदार्थ जस्तै कोकाकोला पनि खाने गरिन्छ?<br>(दायाँतिर भएका उत्तरहरू तुरुन्तै नभन्नुस् । प्रश्न सोधेपछि केही समय पर्खनुस् । यदि सहभागीलाई उत्तर भन्न गाह्रो भएमा मात्र उक्त उत्तरहरू पढ्नुहोला ।) | 1. हो, प्रायजसो हुन्छ<br>2. कहिलेकाहीं<br>3. प्रायजसो हुँदैन<br>4. थाहा छैन वा भन्न सकिदैन                                                                                                                                                                                                          | <input type="checkbox"/> | Bd5 |
| 64. | के तपाईं आफ्नो घरमा जंक फुड नियन्त्रण गर्नुहुन्छ ?<br>(दायाँतिर भएका उत्तरहरू तुरुन्तै नभन्नुस् । प्रश्न सोधेपछि केही समय पर्खनुस् । यदि सहभागीलाई उत्तर भन्न गाह्रो भएमा मात्र उक्त उत्तरहरू पढ्नुहोला ।)                             | 1. बजारु खानेकुरा वा जंक फुड भनेको थाहा छैन<br>2. घरमा स्वस्थकर खानेकुरा राख्ने कोशिस गर्छु तर पनि केही अस्वस्थकर खानेकुरा भइहाल्छ ।<br>3. परिवारमा केकस्तो खानेकुरा दिइन्छ वास्ता नै हुँदैन<br>4. घरमा स्वस्थकर खानेकुरा मात्र हुन्छ<br>5. अन्य (उल्लेख गर्ने) _____<br>6. थाहा छैन वा भन्न सकिदैन | <input type="checkbox"/> | Bd6 |

### B. बच्चाको खापानको तौरतरिका

अब म तपाईंका बालबालिकाहरू (बच्चाहरू)को खानपानको तौरतरिकाको बारेमा सोध्नेछु ।

यदि सहभागी (उत्तरदाता)को एकभन्दा बढी १ देखि ७ वर्षका बालबालिका छन् भने प्रत्येकलाई बेग्लै नम्बर दिई राख्ने जस्तै १, २, ३ आदि (बढीमा ३ जनाको मात्र) र प्रत्येक बच्चाको जानकारी वा उसकै नाम भएको छेउमा लेख्ने । प्रत्येक प्रश्नको उत्तरमा “√” चिन्ह लगाउनुहोस् ।

| क्र.सं. | प्रश्नहरू                                                                                                                                         | उत्तर                                                                                                                                                  | कोड                |
|---------|---------------------------------------------------------------------------------------------------------------------------------------------------|--------------------------------------------------------------------------------------------------------------------------------------------------------|--------------------|
| 65.     | तल राखिएको प्रश्न प्रत्येक (१ देखि ७ वर्ष उमेरका) बच्चाको लागि एक-एक गरी सोध्नुहोला । प्रत्येक बच्चाको उत्तर तल दिइएको बेग्लै कोठामा लेख्नुहोस् । |                                                                                                                                                        |                    |
| बच्चा १ | के तपाईं प्रायजसो आफुले खाने गरेको खानेकुरा नै आफ्ना बच्चा (बच्चाहरू) लाई खान दिनुहुन्छ ?<br>(प्राप्त उत्तरमा घेरा लाउनुहोस्)                     | 1. हो, त्यस्तै दिन्छौं<br>2. अँह, त्यस्तै दिन्नौं<br>i. यदि दिनुहुन्न भने किन ?<br>_____<br>3. अन्य (उल्लेख गर्ने) _____<br>4. थाहा छैन वा भन्न सकिदैन | Bd7.1<br>Bd7.1.2.i |
| बच्चा २ | के तपाईं प्रायजसो आफुले खाने गरेको खानेकुरा नै आफ्ना बच्चा (बच्चाहरू) लाई खान दिनुहुन्छ ?<br>(प्राप्त उत्तरमा घेरा लाउनुहोस्)                     | 1. हो, त्यस्तै दिन्छौं<br>2. अँह, त्यस्तै दिन्नौं<br>i. यदि दिनुहुन्न भने किन ?<br>_____<br>3. अन्य (उल्लेख गर्ने) _____<br>4. थाहा छैन वा भन्न सकिदैन | Bd7.2<br>Bd7.2.2.i |
| बच्चा ३ | के तपाईं प्रायजसो आफुले खाने गरेको खानेकुरा नै आफ्ना बच्चा (बच्चाहरू) लाई खान दिनुहुन्छ ?<br>(प्राप्त उत्तरमा घेरा लाउनुहोस्)                     | 1. हो, त्यस्तै दिन्छौं<br>2. अँह, त्यस्तै दिन्नौं<br>i. यदि दिनुहुन्न भने किन ?<br>_____<br>3. अन्य (उल्लेख गर्ने) _____<br>4. थाहा छैन वा भन्न सकिदैन | Bd7.3<br>Bd7.3.2.i |

| <p>66.</p> <p>तपाईंको बच्चा (बच्चाहरु) ले विद्यालयको टिफीन समयमा के खानेकुरा खान्छ ?</p> <p><i>(दायाँतिर भएका उत्तरहरु तुरुन्तै नभन्नुस् । प्रश्न सोधेपछि केही समय पर्खनुस् । यदि सहभागीलाई उत्तर भन्न गाह्रो भएमा मात्र उक्त उत्तरहरु पढ्नुहोला ।)</i></p>                          | <table border="1"> <thead> <tr> <th>प्रश्न</th> <th>बच्चा १</th> <th>बच्चा २</th> <th>बच्चा ३</th> </tr> </thead> <tbody> <tr> <td>1. सँधै घरबाट लगेको खाजा खान्छ</td> <td></td> <td></td> <td></td> </tr> <tr> <td>2. कहिलेकाहीं विद्यालयले नै दिएको खान्छ वा त्यहीँ किनेर खान्छ, कहिलेकाहीं घरबाट लिएर जान्छ</td> <td></td> <td></td> <td></td> </tr> <tr> <td>3. सँधै विद्यालयले दिने खाजा खाने गर्छ</td> <td></td> <td></td> <td></td> </tr> <tr> <td>4. नजिकको पसलबाट खाजा किनेर खाने</td> <td></td> <td></td> <td></td> </tr> <tr> <td>5. अन्य (उल्लेख गर्ने)<br/>_____</td> <td></td> <td></td> <td></td> </tr> <tr> <td>6. विद्यालय नै जाँदैन</td> <td></td> <td></td> <td></td> </tr> <tr> <td>7. थाहा छैन वा भन्न सकिदैन</td> <td></td> <td></td> <td></td> </tr> </tbody> </table>                               | प्रश्न  | बच्चा १ | बच्चा २ | बच्चा ३ | 1. सँधै घरबाट लगेको खाजा खान्छ |  |  |  | 2. कहिलेकाहीं विद्यालयले नै दिएको खान्छ वा त्यहीँ किनेर खान्छ, कहिलेकाहीं घरबाट लिएर जान्छ |  |  |  | 3. सँधै विद्यालयले दिने खाजा खाने गर्छ |  |  |  | 4. नजिकको पसलबाट खाजा किनेर खाने |  |  |  | 5. अन्य (उल्लेख गर्ने)<br>_____ |  |  |  | 6. विद्यालय नै जाँदैन            |  |  |  | 7. थाहा छैन वा भन्न सकिदैन          |  |  |  | <p>Bd8.1<br/>Bd8.2<br/>Bd8.3</p> |
|--------------------------------------------------------------------------------------------------------------------------------------------------------------------------------------------------------------------------------------------------------------------------------------|-----------------------------------------------------------------------------------------------------------------------------------------------------------------------------------------------------------------------------------------------------------------------------------------------------------------------------------------------------------------------------------------------------------------------------------------------------------------------------------------------------------------------------------------------------------------------------------------------------------------------------------------------------------------------------------------------------------------------------------------------------------------------------------------------------------------------------|---------|---------|---------|---------|--------------------------------|--|--|--|--------------------------------------------------------------------------------------------|--|--|--|----------------------------------------|--|--|--|----------------------------------|--|--|--|---------------------------------|--|--|--|----------------------------------|--|--|--|-------------------------------------|--|--|--|----------------------------------|
| प्रश्न                                                                                                                                                                                                                                                                               | बच्चा १                                                                                                                                                                                                                                                                                                                                                                                                                                                                                                                                                                                                                                                                                                                                                                                                                     | बच्चा २ | बच्चा ३ |         |         |                                |  |  |  |                                                                                            |  |  |  |                                        |  |  |  |                                  |  |  |  |                                 |  |  |  |                                  |  |  |  |                                     |  |  |  |                                  |
| 1. सँधै घरबाट लगेको खाजा खान्छ                                                                                                                                                                                                                                                       |                                                                                                                                                                                                                                                                                                                                                                                                                                                                                                                                                                                                                                                                                                                                                                                                                             |         |         |         |         |                                |  |  |  |                                                                                            |  |  |  |                                        |  |  |  |                                  |  |  |  |                                 |  |  |  |                                  |  |  |  |                                     |  |  |  |                                  |
| 2. कहिलेकाहीं विद्यालयले नै दिएको खान्छ वा त्यहीँ किनेर खान्छ, कहिलेकाहीं घरबाट लिएर जान्छ                                                                                                                                                                                           |                                                                                                                                                                                                                                                                                                                                                                                                                                                                                                                                                                                                                                                                                                                                                                                                                             |         |         |         |         |                                |  |  |  |                                                                                            |  |  |  |                                        |  |  |  |                                  |  |  |  |                                 |  |  |  |                                  |  |  |  |                                     |  |  |  |                                  |
| 3. सँधै विद्यालयले दिने खाजा खाने गर्छ                                                                                                                                                                                                                                               |                                                                                                                                                                                                                                                                                                                                                                                                                                                                                                                                                                                                                                                                                                                                                                                                                             |         |         |         |         |                                |  |  |  |                                                                                            |  |  |  |                                        |  |  |  |                                  |  |  |  |                                 |  |  |  |                                  |  |  |  |                                     |  |  |  |                                  |
| 4. नजिकको पसलबाट खाजा किनेर खाने                                                                                                                                                                                                                                                     |                                                                                                                                                                                                                                                                                                                                                                                                                                                                                                                                                                                                                                                                                                                                                                                                                             |         |         |         |         |                                |  |  |  |                                                                                            |  |  |  |                                        |  |  |  |                                  |  |  |  |                                 |  |  |  |                                  |  |  |  |                                     |  |  |  |                                  |
| 5. अन्य (उल्लेख गर्ने)<br>_____                                                                                                                                                                                                                                                      |                                                                                                                                                                                                                                                                                                                                                                                                                                                                                                                                                                                                                                                                                                                                                                                                                             |         |         |         |         |                                |  |  |  |                                                                                            |  |  |  |                                        |  |  |  |                                  |  |  |  |                                 |  |  |  |                                  |  |  |  |                                     |  |  |  |                                  |
| 6. विद्यालय नै जाँदैन                                                                                                                                                                                                                                                                |                                                                                                                                                                                                                                                                                                                                                                                                                                                                                                                                                                                                                                                                                                                                                                                                                             |         |         |         |         |                                |  |  |  |                                                                                            |  |  |  |                                        |  |  |  |                                  |  |  |  |                                 |  |  |  |                                  |  |  |  |                                     |  |  |  |                                  |
| 7. थाहा छैन वा भन्न सकिदैन                                                                                                                                                                                                                                                           |                                                                                                                                                                                                                                                                                                                                                                                                                                                                                                                                                                                                                                                                                                                                                                                                                             |         |         |         |         |                                |  |  |  |                                                                                            |  |  |  |                                        |  |  |  |                                  |  |  |  |                                 |  |  |  |                                  |  |  |  |                                     |  |  |  |                                  |
| <p>67.</p> <p>तपाईंको बच्चा (बच्चाहरु)ले कुन ठाउँमा सबैभन्दा धेरै स्वस्थकर वा स्वास्थ्यवर्धक खानेकुरा खान्छ ?</p> <p><i>(दायाँतिर भएका उत्तरहरु तुरुन्तै नभन्नुस् । प्रश्न सोधेपछि केही समय पर्खनुस् । यदि सहभागीलाई उत्तर भन्न गाह्रो भएमा मात्र उक्त उत्तरहरु पढ्नुहोला ।)</i></p> | <table border="1"> <thead> <tr> <th>प्रश्न</th> <th>बच्चा १</th> <th>बच्चा २</th> <th>बच्चा ३</th> </tr> </thead> <tbody> <tr> <td>1. घरमा</td> <td></td> <td></td> <td></td> </tr> <tr> <td>2. विद्यालयमा</td> <td></td> <td></td> <td></td> </tr> <tr> <td>3. घरबाहिर (होटल आदि)मा</td> <td></td> <td></td> <td></td> </tr> <tr> <td>4. अन्य (उल्लेख गर्ने)<br/>_____</td> <td></td> <td></td> <td></td> </tr> <tr> <td>5. थाहा छैन वा भन्न सकिदैन</td> <td></td> <td></td> <td></td> </tr> </tbody> </table>                                                                                                                                                                                                                                                                                                             | प्रश्न  | बच्चा १ | बच्चा २ | बच्चा ३ | 1. घरमा                        |  |  |  | 2. विद्यालयमा                                                                              |  |  |  | 3. घरबाहिर (होटल आदि)मा                |  |  |  | 4. अन्य (उल्लेख गर्ने)<br>_____  |  |  |  | 5. थाहा छैन वा भन्न सकिदैन      |  |  |  | <p>Bd9.1<br/>Bd9.2<br/>Bd9.3</p> |  |  |  |                                     |  |  |  |                                  |
| प्रश्न                                                                                                                                                                                                                                                                               | बच्चा १                                                                                                                                                                                                                                                                                                                                                                                                                                                                                                                                                                                                                                                                                                                                                                                                                     | बच्चा २ | बच्चा ३ |         |         |                                |  |  |  |                                                                                            |  |  |  |                                        |  |  |  |                                  |  |  |  |                                 |  |  |  |                                  |  |  |  |                                     |  |  |  |                                  |
| 1. घरमा                                                                                                                                                                                                                                                                              |                                                                                                                                                                                                                                                                                                                                                                                                                                                                                                                                                                                                                                                                                                                                                                                                                             |         |         |         |         |                                |  |  |  |                                                                                            |  |  |  |                                        |  |  |  |                                  |  |  |  |                                 |  |  |  |                                  |  |  |  |                                     |  |  |  |                                  |
| 2. विद्यालयमा                                                                                                                                                                                                                                                                        |                                                                                                                                                                                                                                                                                                                                                                                                                                                                                                                                                                                                                                                                                                                                                                                                                             |         |         |         |         |                                |  |  |  |                                                                                            |  |  |  |                                        |  |  |  |                                  |  |  |  |                                 |  |  |  |                                  |  |  |  |                                     |  |  |  |                                  |
| 3. घरबाहिर (होटल आदि)मा                                                                                                                                                                                                                                                              |                                                                                                                                                                                                                                                                                                                                                                                                                                                                                                                                                                                                                                                                                                                                                                                                                             |         |         |         |         |                                |  |  |  |                                                                                            |  |  |  |                                        |  |  |  |                                  |  |  |  |                                 |  |  |  |                                  |  |  |  |                                     |  |  |  |                                  |
| 4. अन्य (उल्लेख गर्ने)<br>_____                                                                                                                                                                                                                                                      |                                                                                                                                                                                                                                                                                                                                                                                                                                                                                                                                                                                                                                                                                                                                                                                                                             |         |         |         |         |                                |  |  |  |                                                                                            |  |  |  |                                        |  |  |  |                                  |  |  |  |                                 |  |  |  |                                  |  |  |  |                                     |  |  |  |                                  |
| 5. थाहा छैन वा भन्न सकिदैन                                                                                                                                                                                                                                                           |                                                                                                                                                                                                                                                                                                                                                                                                                                                                                                                                                                                                                                                                                                                                                                                                                             |         |         |         |         |                                |  |  |  |                                                                                            |  |  |  |                                        |  |  |  |                                  |  |  |  |                                 |  |  |  |                                  |  |  |  |                                     |  |  |  |                                  |
| <p>68.</p> <p>तपाईंको बच्चा (बच्चाहरु)ले कति कति समयमा गोजीखर्च वा पाकेट खर्च लाने गर्छ?</p> <p><i>(दायाँतिर भएका उत्तरहरु तुरुन्तै नभन्नुस् । प्रश्न सोधेपछि केही समय पर्खनुस् । यदि सहभागीलाई उत्तर भन्न गाह्रो भएमा मात्र उक्त उत्तरहरु पढ्नुहोला ।)</i></p>                      | <table border="1"> <thead> <tr> <th>प्रश्न</th> <th>बच्चा १</th> <th>बच्चा २</th> <th>बच्चा ३</th> </tr> </thead> <tbody> <tr> <td>1. सँधै वा प्रत्येक दिन</td> <td></td> <td></td> <td></td> </tr> <tr> <td>2. सातामा दुई-तीन पटक</td> <td></td> <td></td> <td></td> </tr> <tr> <td>3. सातामा एकपटक</td> <td></td> <td></td> <td></td> </tr> <tr> <td>4. कहिले पनि लोदैन</td> <td></td> <td></td> <td></td> </tr> <tr> <td>5. अन्य (उल्लेख गर्ने)<br/>_____</td> <td></td> <td></td> <td></td> </tr> <tr> <td>6. थाहा छैन वा भन्न सकिदैन</td> <td></td> <td></td> <td></td> </tr> </tbody> </table> <p><i>यदि कुनै पनि नम्बरको बच्चाको लागि उत्तर 4 वा 6 आउँछ भने, प्रश्न नं. 70 मा त्यही नम्बरको बच्चाको कोठामा जाने । यदि, अरु बच्चाको लागि उत्तर नं. 4 वा 6 छैन भने उनीहरुको शुरुवात प्रश्न नं. 69 बाटै गर्ने ।</i></p> | प्रश्न  | बच्चा १ | बच्चा २ | बच्चा ३ | 1. सँधै वा प्रत्येक दिन        |  |  |  | 2. सातामा दुई-तीन पटक                                                                      |  |  |  | 3. सातामा एकपटक                        |  |  |  | 4. कहिले पनि लोदैन               |  |  |  | 5. अन्य (उल्लेख गर्ने)<br>_____ |  |  |  | 6. थाहा छैन वा भन्न सकिदैन       |  |  |  | <p>Bd10.1<br/>Bd10.2<br/>Bd10.3</p> |  |  |  |                                  |
| प्रश्न                                                                                                                                                                                                                                                                               | बच्चा १                                                                                                                                                                                                                                                                                                                                                                                                                                                                                                                                                                                                                                                                                                                                                                                                                     | बच्चा २ | बच्चा ३ |         |         |                                |  |  |  |                                                                                            |  |  |  |                                        |  |  |  |                                  |  |  |  |                                 |  |  |  |                                  |  |  |  |                                     |  |  |  |                                  |
| 1. सँधै वा प्रत्येक दिन                                                                                                                                                                                                                                                              |                                                                                                                                                                                                                                                                                                                                                                                                                                                                                                                                                                                                                                                                                                                                                                                                                             |         |         |         |         |                                |  |  |  |                                                                                            |  |  |  |                                        |  |  |  |                                  |  |  |  |                                 |  |  |  |                                  |  |  |  |                                     |  |  |  |                                  |
| 2. सातामा दुई-तीन पटक                                                                                                                                                                                                                                                                |                                                                                                                                                                                                                                                                                                                                                                                                                                                                                                                                                                                                                                                                                                                                                                                                                             |         |         |         |         |                                |  |  |  |                                                                                            |  |  |  |                                        |  |  |  |                                  |  |  |  |                                 |  |  |  |                                  |  |  |  |                                     |  |  |  |                                  |
| 3. सातामा एकपटक                                                                                                                                                                                                                                                                      |                                                                                                                                                                                                                                                                                                                                                                                                                                                                                                                                                                                                                                                                                                                                                                                                                             |         |         |         |         |                                |  |  |  |                                                                                            |  |  |  |                                        |  |  |  |                                  |  |  |  |                                 |  |  |  |                                  |  |  |  |                                     |  |  |  |                                  |
| 4. कहिले पनि लोदैन                                                                                                                                                                                                                                                                   |                                                                                                                                                                                                                                                                                                                                                                                                                                                                                                                                                                                                                                                                                                                                                                                                                             |         |         |         |         |                                |  |  |  |                                                                                            |  |  |  |                                        |  |  |  |                                  |  |  |  |                                 |  |  |  |                                  |  |  |  |                                     |  |  |  |                                  |
| 5. अन्य (उल्लेख गर्ने)<br>_____                                                                                                                                                                                                                                                      |                                                                                                                                                                                                                                                                                                                                                                                                                                                                                                                                                                                                                                                                                                                                                                                                                             |         |         |         |         |                                |  |  |  |                                                                                            |  |  |  |                                        |  |  |  |                                  |  |  |  |                                 |  |  |  |                                  |  |  |  |                                     |  |  |  |                                  |
| 6. थाहा छैन वा भन्न सकिदैन                                                                                                                                                                                                                                                           |                                                                                                                                                                                                                                                                                                                                                                                                                                                                                                                                                                                                                                                                                                                                                                                                                             |         |         |         |         |                                |  |  |  |                                                                                            |  |  |  |                                        |  |  |  |                                  |  |  |  |                                 |  |  |  |                                  |  |  |  |                                     |  |  |  |                                  |

| <p>69. यदि तपाईंको बच्चा (बच्चाहरु)ले गोजीखर्च (पाकेट खर्च) लान्छ भने, तिनीहरुले त्यो पैसा केका लागि कसरी खर्च गर्छन् ?</p> <p>(बहु-उत्तर प्रश्न)<br/>(Multiple answer question)<br/>(दायाँतिर भएका उत्तरहरु तुरुन्तै नभन्नुस् । प्रश्न सोधेपछि केही समय पर्खनुस् । यदि सहभागीलाई उत्तर भन्न गाह्रो भएमा मात्र उक्त उत्तरहरु पढ्नुहोला ।)</p> | <table border="1"> <tr> <th>प्रश्न</th> <th>बच्चा १</th> <th>बच्चा २</th> <th>बच्चा ३</th> </tr> <tr> <td>1. खानेकुरा किन्छ</td> <td></td> <td></td> <td></td> </tr> <tr> <td>2. चकलेट किन्छ</td> <td></td> <td></td> <td></td> </tr> <tr> <td>3. पेयपदार्थ जस्तै कोकाकोला किन्छ</td> <td></td> <td></td> <td></td> </tr> <tr> <td>4. खेल्ने चिज जस्तै गुडिया आदि किन्छ</td> <td></td> <td></td> <td></td> </tr> <tr> <td>5. इन्टरनेटमा खेल (गेम) खेल्छ</td> <td></td> <td></td> <td></td> </tr> <tr> <td>6. बचत गर्छ</td> <td></td> <td></td> <td></td> </tr> <tr> <td>7. अन्य (उल्लेख गर्ने)<br/>_____</td> <td></td> <td></td> <td></td> </tr> <tr> <td>8. म वास्तै गर्दिन</td> <td></td> <td></td> <td></td> </tr> <tr> <td>9. थाहा छैन वा भन्न सकिदैन</td> <td></td> <td></td> <td></td> </tr> </table> | प्रश्न  | बच्चा १ | बच्चा २ | बच्चा ३ | 1. खानेकुरा किन्छ |  |  |  | 2. चकलेट किन्छ |  |  |  | 3. पेयपदार्थ जस्तै कोकाकोला किन्छ |  |  |  | 4. खेल्ने चिज जस्तै गुडिया आदि किन्छ |  |  |  | 5. इन्टरनेटमा खेल (गेम) खेल्छ |  |  |  | 6. बचत गर्छ |  |  |  | 7. अन्य (उल्लेख गर्ने)<br>_____ |  |  |  | 8. म वास्तै गर्दिन |  |  |  | 9. थाहा छैन वा भन्न सकिदैन |  |  |  | <p><u>Child 1:</u><br/>Bd11.1.1<br/>Bd11.1.2<br/>Bd11.1.3<br/>Bd11.1.4<br/>Bd11.1.5<br/>Bd11.1.6<br/>Bd11.1.7<br/>(For child 2 and 3 – similar format:<br/>Bd11.2.1<br/>etc)</p> |
|-----------------------------------------------------------------------------------------------------------------------------------------------------------------------------------------------------------------------------------------------------------------------------------------------------------------------------------------------|--------------------------------------------------------------------------------------------------------------------------------------------------------------------------------------------------------------------------------------------------------------------------------------------------------------------------------------------------------------------------------------------------------------------------------------------------------------------------------------------------------------------------------------------------------------------------------------------------------------------------------------------------------------------------------------------------------------------------------------------------------------------------------------------------------------|---------|---------|---------|---------|-------------------|--|--|--|----------------|--|--|--|-----------------------------------|--|--|--|--------------------------------------|--|--|--|-------------------------------|--|--|--|-------------|--|--|--|---------------------------------|--|--|--|--------------------|--|--|--|----------------------------|--|--|--|----------------------------------------------------------------------------------------------------------------------------------------------------------------------------------|
|                                                                                                                                                                                                                                                                                                                                               | प्रश्न                                                                                                                                                                                                                                                                                                                                                                                                                                                                                                                                                                                                                                                                                                                                                                                                       | बच्चा १ | बच्चा २ | बच्चा ३ |         |                   |  |  |  |                |  |  |  |                                   |  |  |  |                                      |  |  |  |                               |  |  |  |             |  |  |  |                                 |  |  |  |                    |  |  |  |                            |  |  |  |                                                                                                                                                                                  |
|                                                                                                                                                                                                                                                                                                                                               | 1. खानेकुरा किन्छ                                                                                                                                                                                                                                                                                                                                                                                                                                                                                                                                                                                                                                                                                                                                                                                            |         |         |         |         |                   |  |  |  |                |  |  |  |                                   |  |  |  |                                      |  |  |  |                               |  |  |  |             |  |  |  |                                 |  |  |  |                    |  |  |  |                            |  |  |  |                                                                                                                                                                                  |
|                                                                                                                                                                                                                                                                                                                                               | 2. चकलेट किन्छ                                                                                                                                                                                                                                                                                                                                                                                                                                                                                                                                                                                                                                                                                                                                                                                               |         |         |         |         |                   |  |  |  |                |  |  |  |                                   |  |  |  |                                      |  |  |  |                               |  |  |  |             |  |  |  |                                 |  |  |  |                    |  |  |  |                            |  |  |  |                                                                                                                                                                                  |
|                                                                                                                                                                                                                                                                                                                                               | 3. पेयपदार्थ जस्तै कोकाकोला किन्छ                                                                                                                                                                                                                                                                                                                                                                                                                                                                                                                                                                                                                                                                                                                                                                            |         |         |         |         |                   |  |  |  |                |  |  |  |                                   |  |  |  |                                      |  |  |  |                               |  |  |  |             |  |  |  |                                 |  |  |  |                    |  |  |  |                            |  |  |  |                                                                                                                                                                                  |
|                                                                                                                                                                                                                                                                                                                                               | 4. खेल्ने चिज जस्तै गुडिया आदि किन्छ                                                                                                                                                                                                                                                                                                                                                                                                                                                                                                                                                                                                                                                                                                                                                                         |         |         |         |         |                   |  |  |  |                |  |  |  |                                   |  |  |  |                                      |  |  |  |                               |  |  |  |             |  |  |  |                                 |  |  |  |                    |  |  |  |                            |  |  |  |                                                                                                                                                                                  |
|                                                                                                                                                                                                                                                                                                                                               | 5. इन्टरनेटमा खेल (गेम) खेल्छ                                                                                                                                                                                                                                                                                                                                                                                                                                                                                                                                                                                                                                                                                                                                                                                |         |         |         |         |                   |  |  |  |                |  |  |  |                                   |  |  |  |                                      |  |  |  |                               |  |  |  |             |  |  |  |                                 |  |  |  |                    |  |  |  |                            |  |  |  |                                                                                                                                                                                  |
|                                                                                                                                                                                                                                                                                                                                               | 6. बचत गर्छ                                                                                                                                                                                                                                                                                                                                                                                                                                                                                                                                                                                                                                                                                                                                                                                                  |         |         |         |         |                   |  |  |  |                |  |  |  |                                   |  |  |  |                                      |  |  |  |                               |  |  |  |             |  |  |  |                                 |  |  |  |                    |  |  |  |                            |  |  |  |                                                                                                                                                                                  |
|                                                                                                                                                                                                                                                                                                                                               | 7. अन्य (उल्लेख गर्ने)<br>_____                                                                                                                                                                                                                                                                                                                                                                                                                                                                                                                                                                                                                                                                                                                                                                              |         |         |         |         |                   |  |  |  |                |  |  |  |                                   |  |  |  |                                      |  |  |  |                               |  |  |  |             |  |  |  |                                 |  |  |  |                    |  |  |  |                            |  |  |  |                                                                                                                                                                                  |
|                                                                                                                                                                                                                                                                                                                                               | 8. म वास्तै गर्दिन                                                                                                                                                                                                                                                                                                                                                                                                                                                                                                                                                                                                                                                                                                                                                                                           |         |         |         |         |                   |  |  |  |                |  |  |  |                                   |  |  |  |                                      |  |  |  |                               |  |  |  |             |  |  |  |                                 |  |  |  |                    |  |  |  |                            |  |  |  |                                                                                                                                                                                  |
| 9. थाहा छैन वा भन्न सकिदैन                                                                                                                                                                                                                                                                                                                    |                                                                                                                                                                                                                                                                                                                                                                                                                                                                                                                                                                                                                                                                                                                                                                                                              |         |         |         |         |                   |  |  |  |                |  |  |  |                                   |  |  |  |                                      |  |  |  |                               |  |  |  |             |  |  |  |                                 |  |  |  |                    |  |  |  |                            |  |  |  |                                                                                                                                                                                  |

70. तपाईंलाई म विभिन्न प्रकारका खानेकुराहरु एकएक गरी भन्छु र तपाईंले मलाई भन्नुस् कि यीमध्ये कुन चाहीं खानेकुरा तपाईंको बालबच्चाले खाजाको रूपमा खाने गर्छ ? सम्भावित उत्तर प्रायजसो वा कहिलेकाहीं वा प्राय खाँदैनन् वा थाहा छैन हुन् ।  
(ठीक उत्तर आएको कोठामा (✓) चिन्ह प्रयोग गर्नुस् । प्रत्येक भनाइमा एउटा मात्र ठीक उत्तर छान्नुहोस् ।)

बच्चा १

| Items<br>खानेकुराको प्रकार             | A<br>प्रायजसो | B<br>कहिलेकाहीं | C<br>प्राय खाँदैनन् | D<br>थाहा छैन | कोड       |
|----------------------------------------|---------------|-----------------|---------------------|---------------|-----------|
| 70.1. चाउमिन                           |               |                 |                     |               | Bd12.1.1  |
| 70.2. तयारी चाउचाउ                     |               |                 |                     |               | Bd12.1.2  |
| 70.3. घरमै बनाएको रोटी तरकारी          |               |                 |                     |               | Bd12.1.3  |
| 70.4. मासु वा तरकारी तथा च्युरा        |               |                 |                     |               | Bd12.1.4  |
| 70.5. बिस्कुट तथा पाउरोटी              |               |                 |                     |               | Bd12.1.5  |
| 70.6. मिठाई                            |               |                 |                     |               | Bd12.1.6  |
| 70.7. चटपटे, समोसा, पानीपुरी           |               |                 |                     |               | Bd12.1.7  |
| 70.8. मो:मो:                           |               |                 |                     |               | Bd12.1.8  |
| 70.9. अण्डा                            |               |                 |                     |               | Bd12.1.9  |
| 70.10. दुध                             |               |                 |                     |               | Bd12.1.10 |
| 70.11. चिया                            |               |                 |                     |               | Bd12.1.11 |
| 70.12. दही                             |               |                 |                     |               | Bd12.1.12 |
| 70.13. ताजा सलाद (गाजर, काँक्रा, मुला) |               |                 |                     |               | Bd12.1.13 |
| 70.14. भुटेको / उसिनेको मकै            |               |                 |                     |               | Bd12.1.14 |
| 70.15. फलफुल                           |               |                 |                     |               | Bd12.1.15 |
| 70.16. अन्य (उल्लेख गर्ने)             |               |                 |                     |               | Bd12.1.16 |

**बच्चा २**

| Items<br>खानेकुराको प्रकार             | A<br>प्रायजसो | B<br>कहिलेकाहीं | C<br>प्राय खाँदैनन् | D<br>थाहा छैन | कोड       |
|----------------------------------------|---------------|-----------------|---------------------|---------------|-----------|
| 70.1. चाउमिन                           |               |                 |                     |               | Bd12.2.1  |
| 70.2. तयारी चाउचाउ                     |               |                 |                     |               | Bd12.2.2  |
| 70.3. घरमै बनाएको रोटी तरकारी          |               |                 |                     |               | Bd12.2.3  |
| 70.4. मासु वा तरकारी तथा च्युरा        |               |                 |                     |               | Bd12.2.4  |
| 70.5. बिस्कुट तथा पाउरोटी              |               |                 |                     |               | Bd12.2.5  |
| 70.6. मिठाई                            |               |                 |                     |               | Bd12.2.6  |
| 70.7. चटपटे, समोसा, पानीपुरी           |               |                 |                     |               | Bd12.2.7  |
| 70.8. मो:मो:                           |               |                 |                     |               | Bd12.2.8  |
| 70.9. अण्डा                            |               |                 |                     |               | Bd12.2.9  |
| 70.10. दुध                             |               |                 |                     |               | Bd12.2.10 |
| 70.11. चिया                            |               |                 |                     |               | Bd12.2.11 |
| 70.12. दही                             |               |                 |                     |               | Bd12.2.12 |
| 70.13. ताजा सलाद (गाजर, काँक्रा, मुला) |               |                 |                     |               | Bd12.2.13 |
| 70.14. भुटेको / उसिनेको मकै            |               |                 |                     |               | Bd12.2.14 |
| 70.15. फलफुल                           |               |                 |                     |               | Bd12.2.14 |
| 70.16. अन्य (उल्लेख गर्ने)             |               |                 |                     |               | Bd12.2.15 |

**बच्चा ३**

| Items<br>खानेकुराको प्रकार             | A<br>प्रायजसो | B<br>कहिलेकाहीं | C<br>प्राय खाँदैनन् | D<br>थाहा छैन | कोड       |
|----------------------------------------|---------------|-----------------|---------------------|---------------|-----------|
| 70.1. चाउमिन                           |               |                 |                     |               | Bd12.3.1  |
| 70.2. तयारी चाउचाउ                     |               |                 |                     |               | Bd12.3.2  |
| 70.3. घरमै बनाएको रोटी तरकारी          |               |                 |                     |               | Bd12.3.3  |
| 70.4. मासु वा तरकारी तथा च्युरा        |               |                 |                     |               | Bd12.3.4  |
| 70.5. बिस्कुट तथा पाउरोटी              |               |                 |                     |               | Bd12.3.5  |
| 70.6. मिठाई                            |               |                 |                     |               | Bd12.3.6  |
| 70.7. चटपटे, समोसा, पानीपुरी           |               |                 |                     |               | Bd12.3.7  |
| 70.8. मो:मो:                           |               |                 |                     |               | Bd12.3.8  |
| 70.9. अण्डा                            |               |                 |                     |               | Bd12.3.9  |
| 70.10. दुध                             |               |                 |                     |               | Bd12.3.10 |
| 70.11. चिया                            |               |                 |                     |               | Bd12.3.11 |
| 70.12. दही                             |               |                 |                     |               | Bd12.3.12 |
| 70.13. ताजा सलाद (गाजर, काँक्रा, मुला) |               |                 |                     |               | Bd12.3.13 |
| 70.14. भुटेको / उसिनेको मकै            |               |                 |                     |               | Bd12.3.14 |
| 70.15. फलफुल                           |               |                 |                     |               | Bd12.3.15 |
| 70.16. अन्य (उल्लेख गर्ने)             |               |                 |                     |               | Bd12.3.16 |

| क्र.सं.                       | प्रश्नहरू                                                                                                                                                                                                                                                               | उत्तर                                                                                                                                                                                                                                                                                                                                                                                                                                                                                                                                                                                                                                                                                                                                                                                                                                                                                                                                                  | कोड      |         |         |         |                  |  |  |  |                |  |  |  |                 |  |  |  |                                           |  |  |  |                                  |  |  |  |                              |  |  |  |                             |  |  |  |                                     |  |  |  |                 |  |  |  |                               |  |  |  |                             |  |  |  |                                                                                                                                                                                                                   |
|-------------------------------|-------------------------------------------------------------------------------------------------------------------------------------------------------------------------------------------------------------------------------------------------------------------------|--------------------------------------------------------------------------------------------------------------------------------------------------------------------------------------------------------------------------------------------------------------------------------------------------------------------------------------------------------------------------------------------------------------------------------------------------------------------------------------------------------------------------------------------------------------------------------------------------------------------------------------------------------------------------------------------------------------------------------------------------------------------------------------------------------------------------------------------------------------------------------------------------------------------------------------------------------|----------|---------|---------|---------|------------------|--|--|--|----------------|--|--|--|-----------------|--|--|--|-------------------------------------------|--|--|--|----------------------------------|--|--|--|------------------------------|--|--|--|-----------------------------|--|--|--|-------------------------------------|--|--|--|-----------------|--|--|--|-------------------------------|--|--|--|-----------------------------|--|--|--|-------------------------------------------------------------------------------------------------------------------------------------------------------------------------------------------------------------------|
| 71.                           | <b>प्रत्येक (१ देखि ७ वर्षसम्मका) बच्चाका लागि बेग्लाबेग्लै ठाउँको प्रयोग गर्नुहोस् ।</b>                                                                                                                                                                               |                                                                                                                                                                                                                                                                                                                                                                                                                                                                                                                                                                                                                                                                                                                                                                                                                                                                                                                                                        |          |         |         |         |                  |  |  |  |                |  |  |  |                 |  |  |  |                                           |  |  |  |                                  |  |  |  |                              |  |  |  |                             |  |  |  |                                     |  |  |  |                 |  |  |  |                               |  |  |  |                             |  |  |  |                                                                                                                                                                                                                   |
| बच्चा १                       | तपाईंको बच्चाले बढी मनपराउने कुनै तीनवटा खानेकुरा केके हुन् ?                                                                                                                                                                                                           | 1. _____                                                                                                                                                                                                                                                                                                                                                                                                                                                                                                                                                                                                                                                                                                                                                                                                                                                                                                                                               | Bd13.1.1 |         |         |         |                  |  |  |  |                |  |  |  |                 |  |  |  |                                           |  |  |  |                                  |  |  |  |                              |  |  |  |                             |  |  |  |                                     |  |  |  |                 |  |  |  |                               |  |  |  |                             |  |  |  |                                                                                                                                                                                                                   |
|                               |                                                                                                                                                                                                                                                                         | 2. _____                                                                                                                                                                                                                                                                                                                                                                                                                                                                                                                                                                                                                                                                                                                                                                                                                                                                                                                                               | Bd13.1.2 |         |         |         |                  |  |  |  |                |  |  |  |                 |  |  |  |                                           |  |  |  |                                  |  |  |  |                              |  |  |  |                             |  |  |  |                                     |  |  |  |                 |  |  |  |                               |  |  |  |                             |  |  |  |                                                                                                                                                                                                                   |
|                               |                                                                                                                                                                                                                                                                         | 3. _____                                                                                                                                                                                                                                                                                                                                                                                                                                                                                                                                                                                                                                                                                                                                                                                                                                                                                                                                               | Bd13.1.3 |         |         |         |                  |  |  |  |                |  |  |  |                 |  |  |  |                                           |  |  |  |                                  |  |  |  |                              |  |  |  |                             |  |  |  |                                     |  |  |  |                 |  |  |  |                               |  |  |  |                             |  |  |  |                                                                                                                                                                                                                   |
|                               |                                                                                                                                                                                                                                                                         | 4. थाहा छैन वा भन्न सकिदैन                                                                                                                                                                                                                                                                                                                                                                                                                                                                                                                                                                                                                                                                                                                                                                                                                                                                                                                             | Bd13.1.4 |         |         |         |                  |  |  |  |                |  |  |  |                 |  |  |  |                                           |  |  |  |                                  |  |  |  |                              |  |  |  |                             |  |  |  |                                     |  |  |  |                 |  |  |  |                               |  |  |  |                             |  |  |  |                                                                                                                                                                                                                   |
| बच्चा २                       | तपाईंको बच्चाले बढी मनपराउने कुनै तीनवटा खानेकुरा केके हुन् ?                                                                                                                                                                                                           | 1. _____                                                                                                                                                                                                                                                                                                                                                                                                                                                                                                                                                                                                                                                                                                                                                                                                                                                                                                                                               | Bd13.2.1 |         |         |         |                  |  |  |  |                |  |  |  |                 |  |  |  |                                           |  |  |  |                                  |  |  |  |                              |  |  |  |                             |  |  |  |                                     |  |  |  |                 |  |  |  |                               |  |  |  |                             |  |  |  |                                                                                                                                                                                                                   |
|                               |                                                                                                                                                                                                                                                                         | 2. _____                                                                                                                                                                                                                                                                                                                                                                                                                                                                                                                                                                                                                                                                                                                                                                                                                                                                                                                                               | Bd13.2.2 |         |         |         |                  |  |  |  |                |  |  |  |                 |  |  |  |                                           |  |  |  |                                  |  |  |  |                              |  |  |  |                             |  |  |  |                                     |  |  |  |                 |  |  |  |                               |  |  |  |                             |  |  |  |                                                                                                                                                                                                                   |
|                               |                                                                                                                                                                                                                                                                         | 3. _____                                                                                                                                                                                                                                                                                                                                                                                                                                                                                                                                                                                                                                                                                                                                                                                                                                                                                                                                               | Bd13.2.3 |         |         |         |                  |  |  |  |                |  |  |  |                 |  |  |  |                                           |  |  |  |                                  |  |  |  |                              |  |  |  |                             |  |  |  |                                     |  |  |  |                 |  |  |  |                               |  |  |  |                             |  |  |  |                                                                                                                                                                                                                   |
|                               |                                                                                                                                                                                                                                                                         | 4. थाहा छैन वा भन्न सकिदैन                                                                                                                                                                                                                                                                                                                                                                                                                                                                                                                                                                                                                                                                                                                                                                                                                                                                                                                             | Bd13.2.4 |         |         |         |                  |  |  |  |                |  |  |  |                 |  |  |  |                                           |  |  |  |                                  |  |  |  |                              |  |  |  |                             |  |  |  |                                     |  |  |  |                 |  |  |  |                               |  |  |  |                             |  |  |  |                                                                                                                                                                                                                   |
| बच्चा ३                       | तपाईंको बच्चाले बढी मनपराउने कुनै तीनवटा खानेकुरा केके हुन् ?                                                                                                                                                                                                           | 1. _____                                                                                                                                                                                                                                                                                                                                                                                                                                                                                                                                                                                                                                                                                                                                                                                                                                                                                                                                               | Bd13.3.1 |         |         |         |                  |  |  |  |                |  |  |  |                 |  |  |  |                                           |  |  |  |                                  |  |  |  |                              |  |  |  |                             |  |  |  |                                     |  |  |  |                 |  |  |  |                               |  |  |  |                             |  |  |  |                                                                                                                                                                                                                   |
|                               |                                                                                                                                                                                                                                                                         | 2. _____                                                                                                                                                                                                                                                                                                                                                                                                                                                                                                                                                                                                                                                                                                                                                                                                                                                                                                                                               | Bd13.3.2 |         |         |         |                  |  |  |  |                |  |  |  |                 |  |  |  |                                           |  |  |  |                                  |  |  |  |                              |  |  |  |                             |  |  |  |                                     |  |  |  |                 |  |  |  |                               |  |  |  |                             |  |  |  |                                                                                                                                                                                                                   |
|                               |                                                                                                                                                                                                                                                                         | 3. _____                                                                                                                                                                                                                                                                                                                                                                                                                                                                                                                                                                                                                                                                                                                                                                                                                                                                                                                                               | Bd13.3.3 |         |         |         |                  |  |  |  |                |  |  |  |                 |  |  |  |                                           |  |  |  |                                  |  |  |  |                              |  |  |  |                             |  |  |  |                                     |  |  |  |                 |  |  |  |                               |  |  |  |                             |  |  |  |                                                                                                                                                                                                                   |
|                               |                                                                                                                                                                                                                                                                         | 4. थाहा छैन वा भन्न सकिदैन                                                                                                                                                                                                                                                                                                                                                                                                                                                                                                                                                                                                                                                                                                                                                                                                                                                                                                                             | Bd13.3.4 |         |         |         |                  |  |  |  |                |  |  |  |                 |  |  |  |                                           |  |  |  |                                  |  |  |  |                              |  |  |  |                             |  |  |  |                                     |  |  |  |                 |  |  |  |                               |  |  |  |                             |  |  |  |                                                                                                                                                                                                                   |
| 72.                           | तपाईंको बच्चाले बढी मनपराउने पेयपदार्थ (पिउने कुरा) के हो ?<br>(बहु-उत्तर प्रश्न)<br>(Multiple answer question)<br>(दायाँतिर भएका उत्तरहरू तुरुन्तै नभन्नुस् । प्रश्न सोधेपछि केही समय पर्खनुस् । यदि सहभागीलाई उत्तर भन्न गाह्रो भएमा मात्र उक्त उत्तरहरू पढ्नुहोला ।) | <table border="1"> <thead> <tr> <th>प्रश्न</th> <th>बच्चा १</th> <th>बच्चा २</th> <th>बच्चा ३</th> </tr> </thead> <tbody> <tr> <td>1. पानी</td> <td></td> <td></td> <td></td> </tr> <tr> <td>2. दुध</td> <td></td> <td></td> <td></td> </tr> <tr> <td>3. चिया</td> <td></td> <td></td> <td></td> </tr> <tr> <td>4. पाकेटको जुस जस्तै रियल जुस, स्लाइस आदि</td> <td></td> <td></td> <td></td> </tr> <tr> <td>5. पेय पदार्थ जस्तै कोकाकोला आदि</td> <td></td> <td></td> <td></td> </tr> <tr> <td>6. फलफुलको ताजा रस</td> <td></td> <td></td> <td></td> </tr> <tr> <td>7. हर्लक्स, बुस्ट, कम्प्लान</td> <td></td> <td></td> <td></td> </tr> <tr> <td>8. ट्यांग</td> <td></td> <td></td> <td></td> </tr> <tr> <td>9. ग्लुकोज पानी</td> <td></td> <td></td> <td></td> </tr> <tr> <td>10. अन्य (उल्लेख गर्ने) _____</td> <td></td> <td></td> <td></td> </tr> <tr> <td>11. थाहा छैन वा भन्न सकिदैन</td> <td></td> <td></td> <td></td> </tr> </tbody> </table> | प्रश्न   | बच्चा १ | बच्चा २ | बच्चा ३ | 1. पानी          |  |  |  | 2. दुध         |  |  |  | 3. चिया         |  |  |  | 4. पाकेटको जुस जस्तै रियल जुस, स्लाइस आदि |  |  |  | 5. पेय पदार्थ जस्तै कोकाकोला आदि |  |  |  | 6. फलफुलको ताजा रस           |  |  |  | 7. हर्लक्स, बुस्ट, कम्प्लान |  |  |  | 8. ट्यांग                           |  |  |  | 9. ग्लुकोज पानी |  |  |  | 10. अन्य (उल्लेख गर्ने) _____ |  |  |  | 11. थाहा छैन वा भन्न सकिदैन |  |  |  | <p>Child 1:<br/>Bd14.1.1<br/>Bd14.1.2<br/>Bd14.1.3<br/>Bd14.1.4<br/>Bd14.1.5<br/>Bd14.1.6<br/>Bd14.1.7<br/>Bd14.1.8<br/>Bd14.1.9<br/>Bd14.1.10<br/>(For child 2 and 3 – similar format:<br/>Bd14.2.1<br/>etc)</p> |
|                               |                                                                                                                                                                                                                                                                         | प्रश्न                                                                                                                                                                                                                                                                                                                                                                                                                                                                                                                                                                                                                                                                                                                                                                                                                                                                                                                                                 | बच्चा १  | बच्चा २ | बच्चा ३ |         |                  |  |  |  |                |  |  |  |                 |  |  |  |                                           |  |  |  |                                  |  |  |  |                              |  |  |  |                             |  |  |  |                                     |  |  |  |                 |  |  |  |                               |  |  |  |                             |  |  |  |                                                                                                                                                                                                                   |
|                               |                                                                                                                                                                                                                                                                         | 1. पानी                                                                                                                                                                                                                                                                                                                                                                                                                                                                                                                                                                                                                                                                                                                                                                                                                                                                                                                                                |          |         |         |         |                  |  |  |  |                |  |  |  |                 |  |  |  |                                           |  |  |  |                                  |  |  |  |                              |  |  |  |                             |  |  |  |                                     |  |  |  |                 |  |  |  |                               |  |  |  |                             |  |  |  |                                                                                                                                                                                                                   |
|                               |                                                                                                                                                                                                                                                                         | 2. दुध                                                                                                                                                                                                                                                                                                                                                                                                                                                                                                                                                                                                                                                                                                                                                                                                                                                                                                                                                 |          |         |         |         |                  |  |  |  |                |  |  |  |                 |  |  |  |                                           |  |  |  |                                  |  |  |  |                              |  |  |  |                             |  |  |  |                                     |  |  |  |                 |  |  |  |                               |  |  |  |                             |  |  |  |                                                                                                                                                                                                                   |
|                               |                                                                                                                                                                                                                                                                         | 3. चिया                                                                                                                                                                                                                                                                                                                                                                                                                                                                                                                                                                                                                                                                                                                                                                                                                                                                                                                                                |          |         |         |         |                  |  |  |  |                |  |  |  |                 |  |  |  |                                           |  |  |  |                                  |  |  |  |                              |  |  |  |                             |  |  |  |                                     |  |  |  |                 |  |  |  |                               |  |  |  |                             |  |  |  |                                                                                                                                                                                                                   |
|                               |                                                                                                                                                                                                                                                                         | 4. पाकेटको जुस जस्तै रियल जुस, स्लाइस आदि                                                                                                                                                                                                                                                                                                                                                                                                                                                                                                                                                                                                                                                                                                                                                                                                                                                                                                              |          |         |         |         |                  |  |  |  |                |  |  |  |                 |  |  |  |                                           |  |  |  |                                  |  |  |  |                              |  |  |  |                             |  |  |  |                                     |  |  |  |                 |  |  |  |                               |  |  |  |                             |  |  |  |                                                                                                                                                                                                                   |
|                               |                                                                                                                                                                                                                                                                         | 5. पेय पदार्थ जस्तै कोकाकोला आदि                                                                                                                                                                                                                                                                                                                                                                                                                                                                                                                                                                                                                                                                                                                                                                                                                                                                                                                       |          |         |         |         |                  |  |  |  |                |  |  |  |                 |  |  |  |                                           |  |  |  |                                  |  |  |  |                              |  |  |  |                             |  |  |  |                                     |  |  |  |                 |  |  |  |                               |  |  |  |                             |  |  |  |                                                                                                                                                                                                                   |
|                               |                                                                                                                                                                                                                                                                         | 6. फलफुलको ताजा रस                                                                                                                                                                                                                                                                                                                                                                                                                                                                                                                                                                                                                                                                                                                                                                                                                                                                                                                                     |          |         |         |         |                  |  |  |  |                |  |  |  |                 |  |  |  |                                           |  |  |  |                                  |  |  |  |                              |  |  |  |                             |  |  |  |                                     |  |  |  |                 |  |  |  |                               |  |  |  |                             |  |  |  |                                                                                                                                                                                                                   |
|                               |                                                                                                                                                                                                                                                                         | 7. हर्लक्स, बुस्ट, कम्प्लान                                                                                                                                                                                                                                                                                                                                                                                                                                                                                                                                                                                                                                                                                                                                                                                                                                                                                                                            |          |         |         |         |                  |  |  |  |                |  |  |  |                 |  |  |  |                                           |  |  |  |                                  |  |  |  |                              |  |  |  |                             |  |  |  |                                     |  |  |  |                 |  |  |  |                               |  |  |  |                             |  |  |  |                                                                                                                                                                                                                   |
|                               |                                                                                                                                                                                                                                                                         | 8. ट्यांग                                                                                                                                                                                                                                                                                                                                                                                                                                                                                                                                                                                                                                                                                                                                                                                                                                                                                                                                              |          |         |         |         |                  |  |  |  |                |  |  |  |                 |  |  |  |                                           |  |  |  |                                  |  |  |  |                              |  |  |  |                             |  |  |  |                                     |  |  |  |                 |  |  |  |                               |  |  |  |                             |  |  |  |                                                                                                                                                                                                                   |
|                               |                                                                                                                                                                                                                                                                         | 9. ग्लुकोज पानी                                                                                                                                                                                                                                                                                                                                                                                                                                                                                                                                                                                                                                                                                                                                                                                                                                                                                                                                        |          |         |         |         |                  |  |  |  |                |  |  |  |                 |  |  |  |                                           |  |  |  |                                  |  |  |  |                              |  |  |  |                             |  |  |  |                                     |  |  |  |                 |  |  |  |                               |  |  |  |                             |  |  |  |                                                                                                                                                                                                                   |
| 10. अन्य (उल्लेख गर्ने) _____ |                                                                                                                                                                                                                                                                         |                                                                                                                                                                                                                                                                                                                                                                                                                                                                                                                                                                                                                                                                                                                                                                                                                                                                                                                                                        |          |         |         |         |                  |  |  |  |                |  |  |  |                 |  |  |  |                                           |  |  |  |                                  |  |  |  |                              |  |  |  |                             |  |  |  |                                     |  |  |  |                 |  |  |  |                               |  |  |  |                             |  |  |  |                                                                                                                                                                                                                   |
| 11. थाहा छैन वा भन्न सकिदैन   |                                                                                                                                                                                                                                                                         |                                                                                                                                                                                                                                                                                                                                                                                                                                                                                                                                                                                                                                                                                                                                                                                                                                                                                                                                                        |          |         |         |         |                  |  |  |  |                |  |  |  |                 |  |  |  |                                           |  |  |  |                                  |  |  |  |                              |  |  |  |                             |  |  |  |                                     |  |  |  |                 |  |  |  |                               |  |  |  |                             |  |  |  |                                                                                                                                                                                                                   |
| 73.                           | तपाईंको बच्चाले कतिको (कति पटक) हल्का पेयपदार्थ जस्तै कोकाकोला पिउने गर्छ ?                                                                                                                                                                                             | <table border="1"> <thead> <tr> <th>प्रश्न</th> <th>बच्चा १</th> <th>बच्चा २</th> <th>बच्चा ३</th> </tr> </thead> <tbody> <tr> <td>1. दिनमा दुई पटक</td> <td></td> <td></td> <td></td> </tr> <tr> <td>2. दिनको एकपटक</td> <td></td> <td></td> <td></td> </tr> <tr> <td>3. सातामा एकपटक</td> <td></td> <td></td> <td></td> </tr> <tr> <td>4. सातामा दुई पटक</td> <td></td> <td></td> <td></td> </tr> <tr> <td>5. कहिले पनि पिउँदैन</td> <td></td> <td></td> <td></td> </tr> <tr> <td>6. अन्य (उल्लेख गर्ने) _____</td> <td></td> <td></td> <td></td> </tr> <tr> <td>7. थाहा छैन वा भन्न सकिदैन</td> <td></td> <td></td> <td></td> </tr> </tbody> </table>                                                                                                                                                                                                                                                                                               | प्रश्न   | बच्चा १ | बच्चा २ | बच्चा ३ | 1. दिनमा दुई पटक |  |  |  | 2. दिनको एकपटक |  |  |  | 3. सातामा एकपटक |  |  |  | 4. सातामा दुई पटक                         |  |  |  | 5. कहिले पनि पिउँदैन             |  |  |  | 6. अन्य (उल्लेख गर्ने) _____ |  |  |  | 7. थाहा छैन वा भन्न सकिदैन  |  |  |  | <p>Bd15.1<br/>Bd15.2<br/>Bd15.3</p> |  |  |  |                 |  |  |  |                               |  |  |  |                             |  |  |  |                                                                                                                                                                                                                   |
|                               |                                                                                                                                                                                                                                                                         | प्रश्न                                                                                                                                                                                                                                                                                                                                                                                                                                                                                                                                                                                                                                                                                                                                                                                                                                                                                                                                                 | बच्चा १  | बच्चा २ | बच्चा ३ |         |                  |  |  |  |                |  |  |  |                 |  |  |  |                                           |  |  |  |                                  |  |  |  |                              |  |  |  |                             |  |  |  |                                     |  |  |  |                 |  |  |  |                               |  |  |  |                             |  |  |  |                                                                                                                                                                                                                   |
|                               |                                                                                                                                                                                                                                                                         | 1. दिनमा दुई पटक                                                                                                                                                                                                                                                                                                                                                                                                                                                                                                                                                                                                                                                                                                                                                                                                                                                                                                                                       |          |         |         |         |                  |  |  |  |                |  |  |  |                 |  |  |  |                                           |  |  |  |                                  |  |  |  |                              |  |  |  |                             |  |  |  |                                     |  |  |  |                 |  |  |  |                               |  |  |  |                             |  |  |  |                                                                                                                                                                                                                   |
|                               |                                                                                                                                                                                                                                                                         | 2. दिनको एकपटक                                                                                                                                                                                                                                                                                                                                                                                                                                                                                                                                                                                                                                                                                                                                                                                                                                                                                                                                         |          |         |         |         |                  |  |  |  |                |  |  |  |                 |  |  |  |                                           |  |  |  |                                  |  |  |  |                              |  |  |  |                             |  |  |  |                                     |  |  |  |                 |  |  |  |                               |  |  |  |                             |  |  |  |                                                                                                                                                                                                                   |
|                               |                                                                                                                                                                                                                                                                         | 3. सातामा एकपटक                                                                                                                                                                                                                                                                                                                                                                                                                                                                                                                                                                                                                                                                                                                                                                                                                                                                                                                                        |          |         |         |         |                  |  |  |  |                |  |  |  |                 |  |  |  |                                           |  |  |  |                                  |  |  |  |                              |  |  |  |                             |  |  |  |                                     |  |  |  |                 |  |  |  |                               |  |  |  |                             |  |  |  |                                                                                                                                                                                                                   |
|                               |                                                                                                                                                                                                                                                                         | 4. सातामा दुई पटक                                                                                                                                                                                                                                                                                                                                                                                                                                                                                                                                                                                                                                                                                                                                                                                                                                                                                                                                      |          |         |         |         |                  |  |  |  |                |  |  |  |                 |  |  |  |                                           |  |  |  |                                  |  |  |  |                              |  |  |  |                             |  |  |  |                                     |  |  |  |                 |  |  |  |                               |  |  |  |                             |  |  |  |                                                                                                                                                                                                                   |
|                               |                                                                                                                                                                                                                                                                         | 5. कहिले पनि पिउँदैन                                                                                                                                                                                                                                                                                                                                                                                                                                                                                                                                                                                                                                                                                                                                                                                                                                                                                                                                   |          |         |         |         |                  |  |  |  |                |  |  |  |                 |  |  |  |                                           |  |  |  |                                  |  |  |  |                              |  |  |  |                             |  |  |  |                                     |  |  |  |                 |  |  |  |                               |  |  |  |                             |  |  |  |                                                                                                                                                                                                                   |
| 6. अन्य (उल्लेख गर्ने) _____  |                                                                                                                                                                                                                                                                         |                                                                                                                                                                                                                                                                                                                                                                                                                                                                                                                                                                                                                                                                                                                                                                                                                                                                                                                                                        |          |         |         |         |                  |  |  |  |                |  |  |  |                 |  |  |  |                                           |  |  |  |                                  |  |  |  |                              |  |  |  |                             |  |  |  |                                     |  |  |  |                 |  |  |  |                               |  |  |  |                             |  |  |  |                                                                                                                                                                                                                   |
| 7. थाहा छैन वा भन्न सकिदैन    |                                                                                                                                                                                                                                                                         |                                                                                                                                                                                                                                                                                                                                                                                                                                                                                                                                                                                                                                                                                                                                                                                                                                                                                                                                                        |          |         |         |         |                  |  |  |  |                |  |  |  |                 |  |  |  |                                           |  |  |  |                                  |  |  |  |                              |  |  |  |                             |  |  |  |                                     |  |  |  |                 |  |  |  |                               |  |  |  |                             |  |  |  |                                                                                                                                                                                                                   |

| 74.                                      |                                                                                                                                                                                                                                                                                                                                                          | प्रत्येक (१ देखि ७ वर्षसम्मका) बच्चाका लागि बेग्लाबेगलै ठाउँको प्रयोग गर्नुहोस् ।                                                                                                                                                                                                                                                                                                                                                                                                                                                                                                                                                                                                                                                                                                                                                       |         |         |                      |         |                |  |  |  |                    |  |  |  |                                     |  |  |  |                                          |  |  |  |                                 |  |  |  |                                   |  |                            |  |                          |  |  |  |                              |  |  |  |                            |  |  |  |  |  |                                                                                                                                                                              |
|------------------------------------------|----------------------------------------------------------------------------------------------------------------------------------------------------------------------------------------------------------------------------------------------------------------------------------------------------------------------------------------------------------|-----------------------------------------------------------------------------------------------------------------------------------------------------------------------------------------------------------------------------------------------------------------------------------------------------------------------------------------------------------------------------------------------------------------------------------------------------------------------------------------------------------------------------------------------------------------------------------------------------------------------------------------------------------------------------------------------------------------------------------------------------------------------------------------------------------------------------------------|---------|---------|----------------------|---------|----------------|--|--|--|--------------------|--|--|--|-------------------------------------|--|--|--|------------------------------------------|--|--|--|---------------------------------|--|--|--|-----------------------------------|--|----------------------------|--|--------------------------|--|--|--|------------------------------|--|--|--|----------------------------|--|--|--|--|--|------------------------------------------------------------------------------------------------------------------------------------------------------------------------------|
| बच्चा १                                  | के तपाईंको बच्चाले टेलिभिजन हेरिरहेको समयमा वा कम्प्युटरमा खेलिरहेको समयमा पनि खाने-पिउने गर्छ ?<br>(प्राप्त उत्तरमा घेरा लाउनुहोस्)                                                                                                                                                                                                                     | 1. हो, खान्छ ।<br>i. यदि खान्छ भने, कति पटक ..... (दिन वा हप्तामा)<br>2. अँह, खाँदैन<br>3. थाहा छैन वा भन्न सकिदैन<br>(यदि खाँदैन भने, प्रश्न नं. 78 मा जाने)                                                                                                                                                                                                                                                                                                                                                                                                                                                                                                                                                                                                                                                                           |         |         | Bd16.1<br>Bd16.1.1.i |         |                |  |  |  |                    |  |  |  |                                     |  |  |  |                                          |  |  |  |                                 |  |  |  |                                   |  |                            |  |                          |  |  |  |                              |  |  |  |                            |  |  |  |  |  |                                                                                                                                                                              |
| बच्चा २                                  | के तपाईंको बच्चाले टेलिभिजन हेरिरहेको समयमा वा कम्प्युटरमा खेलिरहेको समयमा पनि खाने-पिउन गर्छ ?<br>(प्राप्त उत्तरमा घेरा लाउनुहोस्)                                                                                                                                                                                                                      | 1. हो, खान्छ ।<br>i. यदि खान्छ भने, कति पटक ..... (दिन वा हप्तामा)<br>2. अँह, खाँदैन<br>3. थाहा छैन वा भन्न सकिदैन<br>(यदि खाँदैन भने, प्रश्न नं. 78 मा जाने)                                                                                                                                                                                                                                                                                                                                                                                                                                                                                                                                                                                                                                                                           |         |         | Bd16.2<br>Bd16.2.1.i |         |                |  |  |  |                    |  |  |  |                                     |  |  |  |                                          |  |  |  |                                 |  |  |  |                                   |  |                            |  |                          |  |  |  |                              |  |  |  |                            |  |  |  |  |  |                                                                                                                                                                              |
| बच्चा ३                                  | के तपाईंको बच्चाले टेलिभिजन हेरिरहेको समयमा वा कम्प्युटरमा खेलिरहेको समयमा पनि खाने-पिउन गर्छ ?<br>(प्राप्त उत्तरमा घेरा लाउनुहोस्)                                                                                                                                                                                                                      | 1. हो, खान्छ ।<br>i. यदि खान्छ भने, कति पटक ..... (दिन वा हप्तामा)<br>2. अँह, खाँदैन<br>3. थाहा छैन वा भन्न सकिदैन<br>(यदि खाँदैन भने, प्रश्न नं. 78 मा जाने)                                                                                                                                                                                                                                                                                                                                                                                                                                                                                                                                                                                                                                                                           |         |         | Bd16.3<br>Bd16.3.1.i |         |                |  |  |  |                    |  |  |  |                                     |  |  |  |                                          |  |  |  |                                 |  |  |  |                                   |  |                            |  |                          |  |  |  |                              |  |  |  |                            |  |  |  |  |  |                                                                                                                                                                              |
| 75.                                      | यदि तपाईंको बच्चाले टेलिभिजन हेरिरहेको वा कम्प्युटरमा खेलिरहेको समयमा पनि खाने-पिउने गर्छ भने, के खाने वा पिउनेकुरा खान्छ/पिउँछ ?<br><b>(Multiple answer question)</b><br>(बहु-उत्तर प्रश्न)<br><br>(दायाँतिर भएका उत्तरहरू तुरुन्तै नभन्नुस् । प्रश्न सोधेपछि केही समय पर्खनुस् । यदि सहभागीलाई उत्तर भन्न गाह्रो भएमा मात्र उक्त उत्तरहरू पढ्नुहोला ।) | <table border="1"> <thead> <tr> <th>प्रश्न</th> <th>बच्चा १</th> <th>बच्चा २</th> <th>बच्चा ३</th> </tr> </thead> <tbody> <tr> <td>1. फलफुल</td> <td></td> <td></td> <td></td> </tr> <tr> <td>2. कुकिज, विस्कट</td> <td></td> <td></td> <td></td> </tr> <tr> <td>3. आलु चिप्स, कुरकुरे, तयारी चाउचाउ</td> <td></td> <td></td> <td></td> </tr> <tr> <td>4. चकलेट</td> <td></td> <td></td> <td></td> </tr> <tr> <td>5. सुख्खा फलफुल, बदाम, गेडागुडी</td> <td></td> <td></td> <td></td> </tr> <tr> <td>6. हल्का पेयपदार्थ जस्तै कोकाकोला</td> <td></td> <td></td> <td></td> </tr> <tr> <td>7. खाना खाने समयमा मात्र</td> <td></td> <td></td> <td></td> </tr> <tr> <td>8. अन्य (उल्लेख गर्ने) _____</td> <td></td> <td></td> <td></td> </tr> <tr> <td>9. थाहा छैन वा भन्न सकिदैन</td> <td></td> <td></td> <td></td> </tr> </tbody> </table> | प्रश्न  | बच्चा १ | बच्चा २              | बच्चा ३ | 1. फलफुल       |  |  |  | 2. कुकिज, विस्कट   |  |  |  | 3. आलु चिप्स, कुरकुरे, तयारी चाउचाउ |  |  |  | 4. चकलेट                                 |  |  |  | 5. सुख्खा फलफुल, बदाम, गेडागुडी |  |  |  | 6. हल्का पेयपदार्थ जस्तै कोकाकोला |  |                            |  | 7. खाना खाने समयमा मात्र |  |  |  | 8. अन्य (उल्लेख गर्ने) _____ |  |  |  | 9. थाहा छैन वा भन्न सकिदैन |  |  |  |  |  | <b>Child 1:</b><br>Bd17.1.1<br>Bd17.1.2<br>Bd17.1.3<br>Bd17.1.4<br>Bd17.1.5<br>Bd17.1.6<br>Bd17.1.7<br>Bd17.1.8<br><br>(For child 2 and 3 – similar format:<br>Bd17.2.1 etc) |
| प्रश्न                                   | बच्चा १                                                                                                                                                                                                                                                                                                                                                  | बच्चा २                                                                                                                                                                                                                                                                                                                                                                                                                                                                                                                                                                                                                                                                                                                                                                                                                                 | बच्चा ३ |         |                      |         |                |  |  |  |                    |  |  |  |                                     |  |  |  |                                          |  |  |  |                                 |  |  |  |                                   |  |                            |  |                          |  |  |  |                              |  |  |  |                            |  |  |  |  |  |                                                                                                                                                                              |
| 1. फलफुल                                 |                                                                                                                                                                                                                                                                                                                                                          |                                                                                                                                                                                                                                                                                                                                                                                                                                                                                                                                                                                                                                                                                                                                                                                                                                         |         |         |                      |         |                |  |  |  |                    |  |  |  |                                     |  |  |  |                                          |  |  |  |                                 |  |  |  |                                   |  |                            |  |                          |  |  |  |                              |  |  |  |                            |  |  |  |  |  |                                                                                                                                                                              |
| 2. कुकिज, विस्कट                         |                                                                                                                                                                                                                                                                                                                                                          |                                                                                                                                                                                                                                                                                                                                                                                                                                                                                                                                                                                                                                                                                                                                                                                                                                         |         |         |                      |         |                |  |  |  |                    |  |  |  |                                     |  |  |  |                                          |  |  |  |                                 |  |  |  |                                   |  |                            |  |                          |  |  |  |                              |  |  |  |                            |  |  |  |  |  |                                                                                                                                                                              |
| 3. आलु चिप्स, कुरकुरे, तयारी चाउचाउ      |                                                                                                                                                                                                                                                                                                                                                          |                                                                                                                                                                                                                                                                                                                                                                                                                                                                                                                                                                                                                                                                                                                                                                                                                                         |         |         |                      |         |                |  |  |  |                    |  |  |  |                                     |  |  |  |                                          |  |  |  |                                 |  |  |  |                                   |  |                            |  |                          |  |  |  |                              |  |  |  |                            |  |  |  |  |  |                                                                                                                                                                              |
| 4. चकलेट                                 |                                                                                                                                                                                                                                                                                                                                                          |                                                                                                                                                                                                                                                                                                                                                                                                                                                                                                                                                                                                                                                                                                                                                                                                                                         |         |         |                      |         |                |  |  |  |                    |  |  |  |                                     |  |  |  |                                          |  |  |  |                                 |  |  |  |                                   |  |                            |  |                          |  |  |  |                              |  |  |  |                            |  |  |  |  |  |                                                                                                                                                                              |
| 5. सुख्खा फलफुल, बदाम, गेडागुडी          |                                                                                                                                                                                                                                                                                                                                                          |                                                                                                                                                                                                                                                                                                                                                                                                                                                                                                                                                                                                                                                                                                                                                                                                                                         |         |         |                      |         |                |  |  |  |                    |  |  |  |                                     |  |  |  |                                          |  |  |  |                                 |  |  |  |                                   |  |                            |  |                          |  |  |  |                              |  |  |  |                            |  |  |  |  |  |                                                                                                                                                                              |
| 6. हल्का पेयपदार्थ जस्तै कोकाकोला        |                                                                                                                                                                                                                                                                                                                                                          |                                                                                                                                                                                                                                                                                                                                                                                                                                                                                                                                                                                                                                                                                                                                                                                                                                         |         |         |                      |         |                |  |  |  |                    |  |  |  |                                     |  |  |  |                                          |  |  |  |                                 |  |  |  |                                   |  |                            |  |                          |  |  |  |                              |  |  |  |                            |  |  |  |  |  |                                                                                                                                                                              |
| 7. खाना खाने समयमा मात्र                 |                                                                                                                                                                                                                                                                                                                                                          |                                                                                                                                                                                                                                                                                                                                                                                                                                                                                                                                                                                                                                                                                                                                                                                                                                         |         |         |                      |         |                |  |  |  |                    |  |  |  |                                     |  |  |  |                                          |  |  |  |                                 |  |  |  |                                   |  |                            |  |                          |  |  |  |                              |  |  |  |                            |  |  |  |  |  |                                                                                                                                                                              |
| 8. अन्य (उल्लेख गर्ने) _____             |                                                                                                                                                                                                                                                                                                                                                          |                                                                                                                                                                                                                                                                                                                                                                                                                                                                                                                                                                                                                                                                                                                                                                                                                                         |         |         |                      |         |                |  |  |  |                    |  |  |  |                                     |  |  |  |                                          |  |  |  |                                 |  |  |  |                                   |  |                            |  |                          |  |  |  |                              |  |  |  |                            |  |  |  |  |  |                                                                                                                                                                              |
| 9. थाहा छैन वा भन्न सकिदैन               |                                                                                                                                                                                                                                                                                                                                                          |                                                                                                                                                                                                                                                                                                                                                                                                                                                                                                                                                                                                                                                                                                                                                                                                                                         |         |         |                      |         |                |  |  |  |                    |  |  |  |                                     |  |  |  |                                          |  |  |  |                                 |  |  |  |                                   |  |                            |  |                          |  |  |  |                              |  |  |  |                            |  |  |  |  |  |                                                                                                                                                                              |
| 76.                                      | के तपाईंको बच्चाले टेलिभिजनमा देखेको खानेकुरा ल्याइदिनु ( किनिदिनु) भन्छ ?<br>(दायाँतिर भएका उत्तरहरू तुरुन्तै नभन्नुस् । प्रश्न सोधेपछि केही समय पर्खनुस् । यदि सहभागीलाई उत्तर भन्न गाह्रो भएमा मात्र उक्त उत्तरहरू पढ्नुहोला ।)                                                                                                                       | <table border="1"> <thead> <tr> <th>प्रश्न</th> <th>बच्चा १</th> <th>बच्चा २</th> <th>बच्चा ३</th> </tr> </thead> <tbody> <tr> <td>1. अँह, भन्दैन</td> <td></td> <td></td> <td></td> </tr> <tr> <td>2. कहिलेकाहीं भन्छ</td> <td></td> <td></td> <td></td> </tr> <tr> <td>3. प्रायजसो भन्छ</td> <td></td> <td></td> <td></td> </tr> <tr> <td>4. मेरो बच्चाले खासै टेलिभिजन नै हेर्दैन</td> <td></td> <td></td> <td></td> </tr> <tr> <td>5. थाहा छैन वा भन्न सकिदैन</td> <td></td> <td></td> <td></td> </tr> </tbody> </table>                                                                                                                                                                                                                                                                                                            | प्रश्न  | बच्चा १ | बच्चा २              | बच्चा ३ | 1. अँह, भन्दैन |  |  |  | 2. कहिलेकाहीं भन्छ |  |  |  | 3. प्रायजसो भन्छ                    |  |  |  | 4. मेरो बच्चाले खासै टेलिभिजन नै हेर्दैन |  |  |  | 5. थाहा छैन वा भन्न सकिदैन      |  |  |  |                                   |  | Bd18.1<br>Bd18.2<br>Bd18.3 |  |                          |  |  |  |                              |  |  |  |                            |  |  |  |  |  |                                                                                                                                                                              |
| प्रश्न                                   | बच्चा १                                                                                                                                                                                                                                                                                                                                                  | बच्चा २                                                                                                                                                                                                                                                                                                                                                                                                                                                                                                                                                                                                                                                                                                                                                                                                                                 | बच्चा ३ |         |                      |         |                |  |  |  |                    |  |  |  |                                     |  |  |  |                                          |  |  |  |                                 |  |  |  |                                   |  |                            |  |                          |  |  |  |                              |  |  |  |                            |  |  |  |  |  |                                                                                                                                                                              |
| 1. अँह, भन्दैन                           |                                                                                                                                                                                                                                                                                                                                                          |                                                                                                                                                                                                                                                                                                                                                                                                                                                                                                                                                                                                                                                                                                                                                                                                                                         |         |         |                      |         |                |  |  |  |                    |  |  |  |                                     |  |  |  |                                          |  |  |  |                                 |  |  |  |                                   |  |                            |  |                          |  |  |  |                              |  |  |  |                            |  |  |  |  |  |                                                                                                                                                                              |
| 2. कहिलेकाहीं भन्छ                       |                                                                                                                                                                                                                                                                                                                                                          |                                                                                                                                                                                                                                                                                                                                                                                                                                                                                                                                                                                                                                                                                                                                                                                                                                         |         |         |                      |         |                |  |  |  |                    |  |  |  |                                     |  |  |  |                                          |  |  |  |                                 |  |  |  |                                   |  |                            |  |                          |  |  |  |                              |  |  |  |                            |  |  |  |  |  |                                                                                                                                                                              |
| 3. प्रायजसो भन्छ                         |                                                                                                                                                                                                                                                                                                                                                          |                                                                                                                                                                                                                                                                                                                                                                                                                                                                                                                                                                                                                                                                                                                                                                                                                                         |         |         |                      |         |                |  |  |  |                    |  |  |  |                                     |  |  |  |                                          |  |  |  |                                 |  |  |  |                                   |  |                            |  |                          |  |  |  |                              |  |  |  |                            |  |  |  |  |  |                                                                                                                                                                              |
| 4. मेरो बच्चाले खासै टेलिभिजन नै हेर्दैन |                                                                                                                                                                                                                                                                                                                                                          |                                                                                                                                                                                                                                                                                                                                                                                                                                                                                                                                                                                                                                                                                                                                                                                                                                         |         |         |                      |         |                |  |  |  |                    |  |  |  |                                     |  |  |  |                                          |  |  |  |                                 |  |  |  |                                   |  |                            |  |                          |  |  |  |                              |  |  |  |                            |  |  |  |  |  |                                                                                                                                                                              |
| 5. थाहा छैन वा भन्न सकिदैन               |                                                                                                                                                                                                                                                                                                                                                          |                                                                                                                                                                                                                                                                                                                                                                                                                                                                                                                                                                                                                                                                                                                                                                                                                                         |         |         |                      |         |                |  |  |  |                    |  |  |  |                                     |  |  |  |                                          |  |  |  |                                 |  |  |  |                                   |  |                            |  |                          |  |  |  |                              |  |  |  |                            |  |  |  |  |  |                                                                                                                                                                              |

| 77.                                              | <p>तपाईं बजार वा पसल गएको बेला, तपाईंको बच्चाले कुनै खानेकुरा किनिदिनु भनेको छ, जुन पहिले तपाईंले किन्छु भनेर सोच्नुभएको थिएन तर के, पछि किनिदिनु हुन्छ? (प्रत्येक बच्चाको लागि बेग्लाबेग्लै सोध्ने)</p> <p>(दायाँतिर भएका उत्तरहरू तुरुन्तै नभन्नुस् । प्रश्न सोधेपछि केही समय पर्खनुस् । यदि सहभागीलाई उत्तर भन्न गाह्रो भएमा मात्र उक्त उत्तरहरू पढ्नुहोला ।)</p> | <table border="1"> <thead> <tr> <th>प्रश्न</th> <th>बच्चा १</th> <th>बच्चा २</th> <th>बच्चा ३</th> </tr> </thead> <tbody> <tr> <td>1. अँह, प्राय किनिदिन्न</td> <td></td> <td></td> <td></td> </tr> <tr> <td>2. कहिलेकाहीं</td> <td></td> <td></td> <td></td> </tr> <tr> <td>3. प्रायजसो</td> <td></td> <td></td> <td></td> </tr> <tr> <td>4. मसँग पैसा भए किनिदिन्छु</td> <td></td> <td></td> <td></td> </tr> <tr> <td>5. उक्त खानेकुरा स्वस्थकर छ भने मात्र किनिदिन्छु</td> <td></td> <td></td> <td></td> </tr> <tr> <td>6. अन्य (उल्लेख गर्ने)</td> <td></td> <td></td> <td></td> </tr> <tr> <td>7. थाहा छैन वा भन्न सकिदैन</td> <td></td> <td></td> <td></td> </tr> </tbody> </table> | प्रश्न                                          | बच्चा १ | बच्चा २ | बच्चा ३ | 1. अँह, प्राय किनिदिन्न |  |  |  | 2. कहिलेकाहीं |  |  |  | 3. प्रायजसो                      |  |  |  | 4. मसँग पैसा भए किनिदिन्छु |  |  |  | 5. उक्त खानेकुरा स्वस्थकर छ भने मात्र किनिदिन्छु |  |  |  | 6. अन्य (उल्लेख गर्ने)                    |  |  |  | 7. थाहा छैन वा भन्न सकिदैन |  |  |  | <p>Bd19.1</p> <p>Bd19.2</p> <p>Bd19.3</p> |
|--------------------------------------------------|----------------------------------------------------------------------------------------------------------------------------------------------------------------------------------------------------------------------------------------------------------------------------------------------------------------------------------------------------------------------|-------------------------------------------------------------------------------------------------------------------------------------------------------------------------------------------------------------------------------------------------------------------------------------------------------------------------------------------------------------------------------------------------------------------------------------------------------------------------------------------------------------------------------------------------------------------------------------------------------------------------------------------------------------------------------------------|-------------------------------------------------|---------|---------|---------|-------------------------|--|--|--|---------------|--|--|--|----------------------------------|--|--|--|----------------------------|--|--|--|--------------------------------------------------|--|--|--|-------------------------------------------|--|--|--|----------------------------|--|--|--|-------------------------------------------|
| प्रश्न                                           | बच्चा १                                                                                                                                                                                                                                                                                                                                                              | बच्चा २                                                                                                                                                                                                                                                                                                                                                                                                                                                                                                                                                                                                                                                                                   | बच्चा ३                                         |         |         |         |                         |  |  |  |               |  |  |  |                                  |  |  |  |                            |  |  |  |                                                  |  |  |  |                                           |  |  |  |                            |  |  |  |                                           |
| 1. अँह, प्राय किनिदिन्न                          |                                                                                                                                                                                                                                                                                                                                                                      |                                                                                                                                                                                                                                                                                                                                                                                                                                                                                                                                                                                                                                                                                           |                                                 |         |         |         |                         |  |  |  |               |  |  |  |                                  |  |  |  |                            |  |  |  |                                                  |  |  |  |                                           |  |  |  |                            |  |  |  |                                           |
| 2. कहिलेकाहीं                                    |                                                                                                                                                                                                                                                                                                                                                                      |                                                                                                                                                                                                                                                                                                                                                                                                                                                                                                                                                                                                                                                                                           |                                                 |         |         |         |                         |  |  |  |               |  |  |  |                                  |  |  |  |                            |  |  |  |                                                  |  |  |  |                                           |  |  |  |                            |  |  |  |                                           |
| 3. प्रायजसो                                      |                                                                                                                                                                                                                                                                                                                                                                      |                                                                                                                                                                                                                                                                                                                                                                                                                                                                                                                                                                                                                                                                                           |                                                 |         |         |         |                         |  |  |  |               |  |  |  |                                  |  |  |  |                            |  |  |  |                                                  |  |  |  |                                           |  |  |  |                            |  |  |  |                                           |
| 4. मसँग पैसा भए किनिदिन्छु                       |                                                                                                                                                                                                                                                                                                                                                                      |                                                                                                                                                                                                                                                                                                                                                                                                                                                                                                                                                                                                                                                                                           |                                                 |         |         |         |                         |  |  |  |               |  |  |  |                                  |  |  |  |                            |  |  |  |                                                  |  |  |  |                                           |  |  |  |                            |  |  |  |                                           |
| 5. उक्त खानेकुरा स्वस्थकर छ भने मात्र किनिदिन्छु |                                                                                                                                                                                                                                                                                                                                                                      |                                                                                                                                                                                                                                                                                                                                                                                                                                                                                                                                                                                                                                                                                           |                                                 |         |         |         |                         |  |  |  |               |  |  |  |                                  |  |  |  |                            |  |  |  |                                                  |  |  |  |                                           |  |  |  |                            |  |  |  |                                           |
| 6. अन्य (उल्लेख गर्ने)                           |                                                                                                                                                                                                                                                                                                                                                                      |                                                                                                                                                                                                                                                                                                                                                                                                                                                                                                                                                                                                                                                                                           |                                                 |         |         |         |                         |  |  |  |               |  |  |  |                                  |  |  |  |                            |  |  |  |                                                  |  |  |  |                                           |  |  |  |                            |  |  |  |                                           |
| 7. थाहा छैन वा भन्न सकिदैन                       |                                                                                                                                                                                                                                                                                                                                                                      |                                                                                                                                                                                                                                                                                                                                                                                                                                                                                                                                                                                                                                                                                           |                                                 |         |         |         |                         |  |  |  |               |  |  |  |                                  |  |  |  |                            |  |  |  |                                                  |  |  |  |                                           |  |  |  |                            |  |  |  |                                           |
| 78.                                              | <p>तपाईंको बच्चाले सँधैजसो बिहानको मुख्य खाना कहाँ खाने गर्छ ?</p> <p>(दायाँतिर भएका उत्तरहरू तुरुन्तै नभन्नुस् । प्रश्न सोधेपछि केही समय पर्खनुस् । यदि सहभागीलाई उत्तर भन्न गाह्रो भएमा मात्र उक्त उत्तरहरू पढ्नुहोला ।)</p>                                                                                                                                       | <table border="1"> <thead> <tr> <th>प्रश्न</th> <th>बच्चा १</th> <th>बच्चा २</th> <th>बच्चा ३</th> </tr> </thead> <tbody> <tr> <td>1. घरमा</td> <td></td> <td></td> <td></td> </tr> <tr> <td>2. विद्यालयमा</td> <td></td> <td></td> <td></td> </tr> <tr> <td>3. विद्यालय जाँदा बाटो छेउ पसलमा</td> <td></td> <td></td> <td></td> </tr> <tr> <td>4. अन्य (उल्लेख गर्ने)</td> <td></td> <td></td> <td></td> </tr> <tr> <td>5. थाहा छैन वा भन्न सकिदैन</td> <td></td> <td></td> <td></td> </tr> </tbody> </table>                                                                                                                                                                            | प्रश्न                                          | बच्चा १ | बच्चा २ | बच्चा ३ | 1. घरमा                 |  |  |  | 2. विद्यालयमा |  |  |  | 3. विद्यालय जाँदा बाटो छेउ पसलमा |  |  |  | 4. अन्य (उल्लेख गर्ने)     |  |  |  | 5. थाहा छैन वा भन्न सकिदैन                       |  |  |  | <p>Bd20.1</p> <p>Bd20.2</p> <p>Bd20.3</p> |  |  |  |                            |  |  |  |                                           |
| प्रश्न                                           | बच्चा १                                                                                                                                                                                                                                                                                                                                                              | बच्चा २                                                                                                                                                                                                                                                                                                                                                                                                                                                                                                                                                                                                                                                                                   | बच्चा ३                                         |         |         |         |                         |  |  |  |               |  |  |  |                                  |  |  |  |                            |  |  |  |                                                  |  |  |  |                                           |  |  |  |                            |  |  |  |                                           |
| 1. घरमा                                          |                                                                                                                                                                                                                                                                                                                                                                      |                                                                                                                                                                                                                                                                                                                                                                                                                                                                                                                                                                                                                                                                                           |                                                 |         |         |         |                         |  |  |  |               |  |  |  |                                  |  |  |  |                            |  |  |  |                                                  |  |  |  |                                           |  |  |  |                            |  |  |  |                                           |
| 2. विद्यालयमा                                    |                                                                                                                                                                                                                                                                                                                                                                      |                                                                                                                                                                                                                                                                                                                                                                                                                                                                                                                                                                                                                                                                                           |                                                 |         |         |         |                         |  |  |  |               |  |  |  |                                  |  |  |  |                            |  |  |  |                                                  |  |  |  |                                           |  |  |  |                            |  |  |  |                                           |
| 3. विद्यालय जाँदा बाटो छेउ पसलमा                 |                                                                                                                                                                                                                                                                                                                                                                      |                                                                                                                                                                                                                                                                                                                                                                                                                                                                                                                                                                                                                                                                                           |                                                 |         |         |         |                         |  |  |  |               |  |  |  |                                  |  |  |  |                            |  |  |  |                                                  |  |  |  |                                           |  |  |  |                            |  |  |  |                                           |
| 4. अन्य (उल्लेख गर्ने)                           |                                                                                                                                                                                                                                                                                                                                                                      |                                                                                                                                                                                                                                                                                                                                                                                                                                                                                                                                                                                                                                                                                           |                                                 |         |         |         |                         |  |  |  |               |  |  |  |                                  |  |  |  |                            |  |  |  |                                                  |  |  |  |                                           |  |  |  |                            |  |  |  |                                           |
| 5. थाहा छैन वा भन्न सकिदैन                       |                                                                                                                                                                                                                                                                                                                                                                      |                                                                                                                                                                                                                                                                                                                                                                                                                                                                                                                                                                                                                                                                                           |                                                 |         |         |         |                         |  |  |  |               |  |  |  |                                  |  |  |  |                            |  |  |  |                                                  |  |  |  |                                           |  |  |  |                            |  |  |  |                                           |
| 79.                                              | प्रत्येक (१ देखि ७ वर्षसम्मका) बच्चाका लागि बेग्लाबेग्लै ठाउँको प्रयोग गर्नुहोस् ।                                                                                                                                                                                                                                                                                   |                                                                                                                                                                                                                                                                                                                                                                                                                                                                                                                                                                                                                                                                                           |                                                 |         |         |         |                         |  |  |  |               |  |  |  |                                  |  |  |  |                            |  |  |  |                                                  |  |  |  |                                           |  |  |  |                            |  |  |  |                                           |
| बच्चा १                                          | <p>तपाईंको बच्चाले बिहानको खानामा सँधैजसो के खाने गर्छ ?</p>                                                                                                                                                                                                                                                                                                         | <p>1. _____</p> <p>2. _____</p> <p>3. _____</p>                                                                                                                                                                                                                                                                                                                                                                                                                                                                                                                                                                                                                                           | <p>Bd21.1.1</p> <p>Bd21.1.2</p> <p>Bd21.1.3</p> |         |         |         |                         |  |  |  |               |  |  |  |                                  |  |  |  |                            |  |  |  |                                                  |  |  |  |                                           |  |  |  |                            |  |  |  |                                           |
| बच्चा २                                          | <p>तपाईंको बच्चाले बिहानको खानामा सँधैजसो के खाने गर्छ ?</p>                                                                                                                                                                                                                                                                                                         | <p>1. _____</p> <p>2. _____</p> <p>3. _____</p>                                                                                                                                                                                                                                                                                                                                                                                                                                                                                                                                                                                                                                           | <p>Bd21.2.1</p> <p>Bd21.2.2</p> <p>Bd21.2.3</p> |         |         |         |                         |  |  |  |               |  |  |  |                                  |  |  |  |                            |  |  |  |                                                  |  |  |  |                                           |  |  |  |                            |  |  |  |                                           |
| बच्चा ३                                          | <p>तपाईंको बच्चाले बिहानको खानामा सँधैजसो के खाने गर्छ ?</p>                                                                                                                                                                                                                                                                                                         | <p>1. _____</p> <p>2. _____</p> <p>3. _____</p>                                                                                                                                                                                                                                                                                                                                                                                                                                                                                                                                                                                                                                           | <p>Bd21.3.1</p> <p>Bd21.3.2</p> <p>Bd21.3.3</p> |         |         |         |                         |  |  |  |               |  |  |  |                                  |  |  |  |                            |  |  |  |                                                  |  |  |  |                                           |  |  |  |                            |  |  |  |                                           |
| 80.                                              | प्रत्येक (१ देखि ७ वर्षसम्मका) बच्चाका लागि बेग्लाबेग्लै ठाउँको प्रयोग गर्नुहोस् ।                                                                                                                                                                                                                                                                                   |                                                                                                                                                                                                                                                                                                                                                                                                                                                                                                                                                                                                                                                                                           |                                                 |         |         |         |                         |  |  |  |               |  |  |  |                                  |  |  |  |                            |  |  |  |                                                  |  |  |  |                                           |  |  |  |                            |  |  |  |                                           |
| बच्चा १                                          | <p>तपाईंको बच्चाले रातिको खानामा सँधैजसो के खाने गर्छ ?</p>                                                                                                                                                                                                                                                                                                          | <p>1. _____</p> <p>2. _____</p>                                                                                                                                                                                                                                                                                                                                                                                                                                                                                                                                                                                                                                                           | <p>Bd22.1.1</p> <p>Bd22.1.2</p>                 |         |         |         |                         |  |  |  |               |  |  |  |                                  |  |  |  |                            |  |  |  |                                                  |  |  |  |                                           |  |  |  |                            |  |  |  |                                           |
| बच्चा २                                          | <p>तपाईंको बच्चाले रातिको खानामा सँधैजसो के खाने गर्छ ?</p>                                                                                                                                                                                                                                                                                                          | <p>1. _____</p> <p>2. _____</p>                                                                                                                                                                                                                                                                                                                                                                                                                                                                                                                                                                                                                                                           | <p>Bd22.2.1</p> <p>Bd22.2.2</p>                 |         |         |         |                         |  |  |  |               |  |  |  |                                  |  |  |  |                            |  |  |  |                                                  |  |  |  |                                           |  |  |  |                            |  |  |  |                                           |
| बच्चा ३                                          | <p>तपाईंको बच्चाले रातिको खानामा सँधैजसो के खाने गर्छ ?</p>                                                                                                                                                                                                                                                                                                          | <p>1. _____</p> <p>2. _____</p>                                                                                                                                                                                                                                                                                                                                                                                                                                                                                                                                                                                                                                                           | <p>Bd22.3.1</p> <p>Bd22.3.2</p>                 |         |         |         |                         |  |  |  |               |  |  |  |                                  |  |  |  |                            |  |  |  |                                                  |  |  |  |                                           |  |  |  |                            |  |  |  |                                           |

**C. Physical activity** शारीरिक क्रियाकलाप वा अभ्यास

अब म तपाईंको शारीरिक क्रियाकलाप वा अभ्यास केकस्तो छ, सोध्ने छु ।

81. तपाईंले प्राय दिनैजसो कामको समयमा तथा फुसर्दको समयमा **बढी परिश्रम पर्ने** शारीरिक क्रियाकलाप बारेमा छुट्टाछुट्टै कुरा गरौं ।

| 81.1 Work कामको समयमा बढी परिश्रम पर्ने शारीरिक क्रियाकलाप<br>(भारी उचाल्ने, पानी बोक्ने, खेतबारी खन्ने, वा निर्माणको काम आदि)                                                                                                                                                                                                                                  |                               | Code                    |                               |                                    |           |                                         |                       |                                      |
|-----------------------------------------------------------------------------------------------------------------------------------------------------------------------------------------------------------------------------------------------------------------------------------------------------------------------------------------------------------------|-------------------------------|-------------------------|-------------------------------|------------------------------------|-----------|-----------------------------------------|-----------------------|--------------------------------------|
| <p>तपाईंले कामको समयमा बढी परिश्रम पर्ने शारीरिक क्रियाकलापको बारेमा भन्नुस् । तपाईंले <b>बढी परिश्रम लगाएर</b> लगातार कम्तीमा १० मिनेटसम्म कुनै कार्य वा गतिविधी वा क्रियाकलाप गर्नुहुन्छ जसले गर्दा तपाईंको श्वास बढ्छ ?<br/>यदि काम गर्नुहुन्छ भने "Yes" मा घेरा लाउनुस् र प्रश्न नं. 81.1a मा जानुहोस् । यदि "No" हो भने प्रश्न नं. 81.2 मा जानुहोस् ।</p>  |                               |                         |                               |                                    |           |                                         |                       |                                      |
| <table border="1"> <thead> <tr> <th>Yes यदि, गर्नुहुन्छ भने</th> <th>No गर्नुहुन्न भने 81.2मा जाने</th> </tr> </thead> <tbody> <tr> <td>81.1a हप्तामा कति दिन गर्नुहुन्छ ?</td> <td>..... दिन</td> </tr> <tr> <td>81.1b प्रतिदिन कति समयसम्म गर्नुहुन्छ ?</td> <td>.....घण्टा..... मिनेट</td> </tr> </tbody> </table>                                           |                               | Yes यदि, गर्नुहुन्छ भने | No गर्नुहुन्न भने 81.2मा जाने | 81.1a हप्तामा कति दिन गर्नुहुन्छ ? | ..... दिन | 81.1b प्रतिदिन कति समयसम्म गर्नुहुन्छ ? | .....घण्टा..... मिनेट | <p>Bp1.1<br/>Bp1.1.a<br/>Bp1.1.b</p> |
| Yes यदि, गर्नुहुन्छ भने                                                                                                                                                                                                                                                                                                                                         | No गर्नुहुन्न भने 81.2मा जाने |                         |                               |                                    |           |                                         |                       |                                      |
| 81.1a हप्तामा कति दिन गर्नुहुन्छ ?                                                                                                                                                                                                                                                                                                                              | ..... दिन                     |                         |                               |                                    |           |                                         |                       |                                      |
| 81.1b प्रतिदिन कति समयसम्म गर्नुहुन्छ ?                                                                                                                                                                                                                                                                                                                         | .....घण्टा..... मिनेट         |                         |                               |                                    |           |                                         |                       |                                      |
| 81.2 Leisure time फुसर्दको समयमा बढी परिश्रम पर्ने शारीरिक क्रियाकलाप<br>(दौडने वा शरीर थकित हुने खेल, गढौं वस्तु उचाल्ने आदि)                                                                                                                                                                                                                                  |                               | Code                    |                               |                                    |           |                                         |                       |                                      |
| <p>तपाईंले फुसर्दको समयमा बढी परिश्रम पर्ने शारीरिक क्रियाकलापको बारेमा भन्नुस् । तपाईंले <b>बढी परिश्रम लगाएर</b> लगातार कम्तीमा १० मिनेटसम्म कुनै कार्य वा गतिविधी वा क्रियाकलाप गर्नुहुन्छ जसले गर्दा तपाईंको श्वास बढ्छ ?<br/>यदि काम गर्नुहुन्छ भने "Yes" मा घेरा लाउनुस् र प्रश्न नं. 81.2a मा जानुहोस् । यदि "No" हो भने प्रश्न नं. 82 मा जानुहोस् ।</p> |                               |                         |                               |                                    |           |                                         |                       |                                      |
| <table border="1"> <thead> <tr> <th>Yes यदि, गर्नुहुन्छ भने</th> <th>No गर्नुहुन्न भने 82 मा जाने</th> </tr> </thead> <tbody> <tr> <td>81.2a हप्तामा कति दिन गर्नुहुन्छ ?</td> <td>..... दिन</td> </tr> <tr> <td>81.2b प्रतिदिन कति समयसम्म गर्नुहुन्छ ?</td> <td>.....घण्टा..... मिनेट</td> </tr> </tbody> </table>                                            |                               | Yes यदि, गर्नुहुन्छ भने | No गर्नुहुन्न भने 82 मा जाने  | 81.2a हप्तामा कति दिन गर्नुहुन्छ ? | ..... दिन | 81.2b प्रतिदिन कति समयसम्म गर्नुहुन्छ ? | .....घण्टा..... मिनेट | <p>Bp1.2<br/>Bp1.2.a<br/>Bp1.2.b</p> |
| Yes यदि, गर्नुहुन्छ भने                                                                                                                                                                                                                                                                                                                                         | No गर्नुहुन्न भने 82 मा जाने  |                         |                               |                                    |           |                                         |                       |                                      |
| 81.2a हप्तामा कति दिन गर्नुहुन्छ ?                                                                                                                                                                                                                                                                                                                              | ..... दिन                     |                         |                               |                                    |           |                                         |                       |                                      |
| 81.2b प्रतिदिन कति समयसम्म गर्नुहुन्छ ?                                                                                                                                                                                                                                                                                                                         | .....घण्टा..... मिनेट         |                         |                               |                                    |           |                                         |                       |                                      |

82. तपाईंले प्राय दिनैजसो कामको समयमा तथा फुसर्दको समयमा **मध्यम परिश्रम पर्ने** शारीरिक क्रियाकलाप बारेमा छुट्टाछुट्टै कुरा गरौं ।

| 82.1 Work कामको समयमा मध्यम परिश्रम पर्ने शारीरिक क्रियाकलाप<br>(लुगा धुने, दुध दुहने, गाई वस्तु चन्हाउने, भुईँ लिप्ने पुच्छने, बाली सुकाउने, हलुका भारी बोक्ने आदि)                                                                                                                                                                                                            |                                | Code                    |                                |                                    |           |                                         |                       |                                      |
|---------------------------------------------------------------------------------------------------------------------------------------------------------------------------------------------------------------------------------------------------------------------------------------------------------------------------------------------------------------------------------|--------------------------------|-------------------------|--------------------------------|------------------------------------|-----------|-----------------------------------------|-----------------------|--------------------------------------|
| <p>तपाईंले कामको समयमा मध्यम परिश्रम पर्ने शारीरिक क्रियाकलापको बारेमा भन्नुस् । तपाईंले <b>मध्यम परिश्रम लगाएर</b> लगातार कम्तीमा १० मिनेटसम्म कुनै कार्य वा गतिविधी वा क्रियाकलाप गर्नुहुन्छ जसले गर्दा तपाईंको श्वास अलिअलि मात्र बढ्छ ?<br/>यदि काम गर्नुहुन्छ भने "Yes" मा घेरा लाउनुस् र प्रश्न नं. 82.1a मा जानुहोस् । यदि "No" हो भने प्रश्न नं. 82.2 मा जानुहोस् ।</p> |                                |                         |                                |                                    |           |                                         |                       |                                      |
| <table border="1"> <thead> <tr> <th>Yes यदि, गर्नुहुन्छ भने</th> <th>No गर्नुहुन्न भने 82.2 मा जाने</th> </tr> </thead> <tbody> <tr> <td>82.1a हप्तामा कति दिन गर्नुहुन्छ ?</td> <td>..... दिन</td> </tr> <tr> <td>82.1b प्रतिदिन कति समयसम्म गर्नुहुन्छ ?</td> <td>.....घण्टा..... मिनेट</td> </tr> </tbody> </table>                                                          |                                | Yes यदि, गर्नुहुन्छ भने | No गर्नुहुन्न भने 82.2 मा जाने | 82.1a हप्तामा कति दिन गर्नुहुन्छ ? | ..... दिन | 82.1b प्रतिदिन कति समयसम्म गर्नुहुन्छ ? | .....घण्टा..... मिनेट | <p>Bp2.1<br/>Bp2.1.a<br/>Bp2.1.b</p> |
| Yes यदि, गर्नुहुन्छ भने                                                                                                                                                                                                                                                                                                                                                         | No गर्नुहुन्न भने 82.2 मा जाने |                         |                                |                                    |           |                                         |                       |                                      |
| 82.1a हप्तामा कति दिन गर्नुहुन्छ ?                                                                                                                                                                                                                                                                                                                                              | ..... दिन                      |                         |                                |                                    |           |                                         |                       |                                      |
| 82.1b प्रतिदिन कति समयसम्म गर्नुहुन्छ ?                                                                                                                                                                                                                                                                                                                                         | .....घण्टा..... मिनेट          |                         |                                |                                    |           |                                         |                       |                                      |



|                                                                                                                                                                                                                                                                                                                                                                   |                                     |                                |                                     |                                    |           |                                         |                       |                             |
|-------------------------------------------------------------------------------------------------------------------------------------------------------------------------------------------------------------------------------------------------------------------------------------------------------------------------------------------------------------------|-------------------------------------|--------------------------------|-------------------------------------|------------------------------------|-----------|-----------------------------------------|-----------------------|-----------------------------|
| <b>82.2 Leisure time</b> फुर्सदको समयमा मध्यम परिश्रम पर्ने शारीरिक क्रियाकलाप<br>(फटाफट हिंड्ने, साइकल कुदाउने, सक्रिय योगा, नाच्ने)                                                                                                                                                                                                                             |                                     | <b>Code</b>                    |                                     |                                    |           |                                         |                       |                             |
| तपाईंले फुर्सदको समयमा मध्यम परिश्रम पर्ने शारीरिक क्रियाकलापको बारेमा भन्नुस् । तपाईंले मध्यम परिश्रम लगाएर लगातार कम्तीमा १० मिनेटसम्म कुनै कार्य वा गतिविधी वा क्रियाकलाप गर्नुहुन्छ, जसले गर्दा तपाईंको श्वास अलिअलि मात्र बहन्छ ?<br>यदि काम गर्नुहुन्छ भने "Yes" मा घेरा लाउनुस् र प्रश्न नं. 82.2a मा जानुहोस् । यदि "No" हो भने प्रश्न नं.83 मा जानुहोस्। |                                     |                                |                                     |                                    |           |                                         |                       |                             |
| <table border="1"> <tr> <td><b>Yes</b> यदि, गर्नुहुन्छ भने</td> <td><b>No</b> गर्नुहुन्न भने 83 मा जाने</td> </tr> <tr> <td>82.2a हप्तामा कति दिन गर्नुहुन्छ ?</td> <td>..... दिन</td> </tr> <tr> <td>82.2b प्रतिदिन कति समयसम्म गर्नुहुन्छ ?</td> <td>.....घण्टा..... मिनेट</td> </tr> </table>                                                                  |                                     | <b>Yes</b> यदि, गर्नुहुन्छ भने | <b>No</b> गर्नुहुन्न भने 83 मा जाने | 82.2a हप्तामा कति दिन गर्नुहुन्छ ? | ..... दिन | 82.2b प्रतिदिन कति समयसम्म गर्नुहुन्छ ? | .....घण्टा..... मिनेट | Bp2.2<br>Bp2.2.a<br>Bp2.2.b |
| <b>Yes</b> यदि, गर्नुहुन्छ भने                                                                                                                                                                                                                                                                                                                                    | <b>No</b> गर्नुहुन्न भने 83 मा जाने |                                |                                     |                                    |           |                                         |                       |                             |
| 82.2a हप्तामा कति दिन गर्नुहुन्छ ?                                                                                                                                                                                                                                                                                                                                | ..... दिन                           |                                |                                     |                                    |           |                                         |                       |                             |
| 82.2b प्रतिदिन कति समयसम्म गर्नुहुन्छ ?                                                                                                                                                                                                                                                                                                                           | .....घण्टा..... मिनेट               |                                |                                     |                                    |           |                                         |                       |                             |

|                                                                                                                                                                                                                                                       |                           |                                    |
|-------------------------------------------------------------------------------------------------------------------------------------------------------------------------------------------------------------------------------------------------------|---------------------------|------------------------------------|
| <b>83. Travel time</b> आवत जावत गर्दाको समयमा गर्ने शारीरिक क्रियाकलाप<br>अब म तपाईंलाई प्रायजसो तपाईंले आवत जावत (जस्तै काम गर्न जाँदा, किनमेल गर्न जाँदा, बजार जाँदा, पूजा गर्न जाँदा आदि) कसरी गर्नुहुन्छ, त्यसबारे केहि प्रश्नहरु सोध्न चाहन्छु । |                           | <b>Code</b>                        |
| 83.1 तपाईंले आवतजावतका लागि कम्तीमा १० मिनेट हिंड्नु वा साइकलको प्रयोग गर्नुहुन्छ?                                                                                                                                                                    | 1. गर्छु ,<br>2. गर्दिन , | भने 83.2 मा जाने<br>भने 84 मा जाने |
| 83.2 यदि गर्छु भने, हप्तामा कति दिन ?                                                                                                                                                                                                                 | ..... दिन                 | Bp3.2                              |
| 83.2 तपाईंले दिनमा कति समय हिंडडुल वा साइकल चलाएर बिताउनुहुन्छ ?                                                                                                                                                                                      | ..... घण्टा..... मिनेट    | Bp3.3                              |

| क्र.सं. | प्रश्नहरु                                                                                            | उत्तर                           | कोड |
|---------|------------------------------------------------------------------------------------------------------|---------------------------------|-----|
| 84.     | प्राय दिनैजसो कति समय तपाईं आराम गरेर बिताउनुहुन्छ ? (जस्तै : पढेर, बुनाई गर्दै, टेलिभिजन हेरेर आदि) | .....घण्टा..... मिनेट प्रति दिन | Bp4 |

**अब म तपाईंका बालबालिकाहरु (बच्चाहरु)को शारीरिक क्रियाकलापको बारेमा सोध्नेछु ।**

यदि सहभागी (उत्तरदाता)को एकभन्दा बढी १ देखि ७ वर्षका बालबालिका छन् भने प्रत्येकलाई बेग्लै नम्बर दिई राख्ने जस्तै १, २, ३ आदि (बढीमा ३ जनाको मात्र) र प्रत्येक बच्चाको जानकारी वा उसकै नाम भएको छेउमा लेख्ने । प्रत्येक प्रश्नको उत्तरमा प्रत्येक बच्चाका लागि उही कोड नं. को प्रयोग गर्ने । यदि एउटा मात्र बच्चा भए बच्चा १ मात्र लेख्ने

|                            |                                                                                                                                                                                                                             |                                     |         |         |         |                         |
|----------------------------|-----------------------------------------------------------------------------------------------------------------------------------------------------------------------------------------------------------------------------|-------------------------------------|---------|---------|---------|-------------------------|
| 85.                        | तपाईंको बच्चा विद्यालय जान्छ ?                                                                                                                                                                                              | प्रश्न                              | बच्चा १ | बच्चा २ | बच्चा ३ | Bp4.1<br>Bp4.2<br>Bp4.3 |
|                            |                                                                                                                                                                                                                             | जान्छ                               |         |         |         |                         |
|                            |                                                                                                                                                                                                                             | जाँदैन भने, (प्रश्न नं. 89 मा जाने) |         |         |         |                         |
| 86.                        | तपाईंको बच्चा सँधैजसो कसरी (वा कुन साधनमा) विद्यालय जाने गर्छ ?<br><br>(दायाँतिर भएका उत्तरहरु तुरुन्तै नभन्नुस् । प्रश्न सोधेपछि केही समय पर्खनुस् । यदि सहभागीलाई उत्तर भन्न गाह्रो भएमा मात्र उक्त उत्तरहरु पढ्नुहोला ।) | प्रश्न                              | बच्चा १ | बच्चा २ | बच्चा ३ | Bp5.1<br>Bp5.2<br>Bp5.3 |
|                            |                                                                                                                                                                                                                             | 1. पैदल (हिंडुदै)                   |         |         |         |                         |
|                            |                                                                                                                                                                                                                             | 2. विद्यालयको बसमा                  |         |         |         |                         |
|                            |                                                                                                                                                                                                                             | 3. कार वा मोटरसाइकलमा               |         |         |         |                         |
|                            |                                                                                                                                                                                                                             | 4. साइकलमा                          |         |         |         |                         |
|                            |                                                                                                                                                                                                                             | 5. अन्य (उल्लेख गर्ने)              |         |         |         |                         |
| 6. थाहा छैन वा भन्न सकिदैन |                                                                                                                                                                                                                             |                                     |         |         |         |                         |

| 87.                                                      | तपाईंको बच्चा विद्यालय आउँदा-जाँदा कति समय हिँड्ने गर्छ?(बसमा जाने भए, बस चढ्ने ठाउँसम्मको समय)                                                                                                                                                                                                       | बच्चा १ .....घण्टा..... मिनेट प्रतिदिन<br>बच्चा २ .....घण्टा..... मिनेट प्रतिदिन<br>बच्चा ३ .....घण्टा..... मिनेट प्रतिदिन                                                                                                                                                                                                                                                                                                                                                                                                                                                                                                                                                                                                                                                                                                                                                                                                                                                                                                                                                                                                                                                                                                                                                                                                                                                                                                                                                                                                                                                                                                                                                                                | Bp6.1<br>Bp6.2<br>Bp6.3    |         |         |         |                   |  |  |  |                    |  |  |  |                          |  |  |  |                  |  |  |  |                                                          |  |  |  |                                 |  |  |  |                            |  |  |  |                                                                                                                                                |
|----------------------------------------------------------|-------------------------------------------------------------------------------------------------------------------------------------------------------------------------------------------------------------------------------------------------------------------------------------------------------|-----------------------------------------------------------------------------------------------------------------------------------------------------------------------------------------------------------------------------------------------------------------------------------------------------------------------------------------------------------------------------------------------------------------------------------------------------------------------------------------------------------------------------------------------------------------------------------------------------------------------------------------------------------------------------------------------------------------------------------------------------------------------------------------------------------------------------------------------------------------------------------------------------------------------------------------------------------------------------------------------------------------------------------------------------------------------------------------------------------------------------------------------------------------------------------------------------------------------------------------------------------------------------------------------------------------------------------------------------------------------------------------------------------------------------------------------------------------------------------------------------------------------------------------------------------------------------------------------------------------------------------------------------------------------------------------------------------|----------------------------|---------|---------|---------|-------------------|--|--|--|--------------------|--|--|--|--------------------------|--|--|--|------------------|--|--|--|----------------------------------------------------------|--|--|--|---------------------------------|--|--|--|----------------------------|--|--|--|------------------------------------------------------------------------------------------------------------------------------------------------|
| 88.                                                      | तपाईंको बच्चाले दिनमा कति समय विद्यालयको गृहकार्य गरेर विताउँछ ?                                                                                                                                                                                                                                      | बच्चा १ .....घण्टा..... मिनेट प्रतिदिन<br>बच्चा २ .....घण्टा..... मिनेट प्रतिदिन<br>बच्चा ३ .....घण्टा..... मिनेट प्रतिदिन                                                                                                                                                                                                                                                                                                                                                                                                                                                                                                                                                                                                                                                                                                                                                                                                                                                                                                                                                                                                                                                                                                                                                                                                                                                                                                                                                                                                                                                                                                                                                                                | Bp7.1<br>Bp7.2<br>Bp7.3    |         |         |         |                   |  |  |  |                    |  |  |  |                          |  |  |  |                  |  |  |  |                                                          |  |  |  |                                 |  |  |  |                            |  |  |  |                                                                                                                                                |
| 89.                                                      | तपाईंको बच्चा खाली समय वा फुर्सदको समय (गृहकार्य सकेपछि वा विदाको समय) कसरी विताउँछ ?<br><br>(बहु-उत्तर प्रश्न)<br>(Multiple answer question)<br>(दायाँतिर भएका उत्तरहरू तुरुन्तै नभन्नुस् । प्रश्न सोधेपछि केही समय पर्खनुस् । यदि सहभागीलाई उत्तर भन्न गाह्रो भएमा मात्र उक्त उत्तरहरू पढ्नुहोला ।) | <table border="1"> <thead> <tr> <th data-bbox="673 489 1045 569">प्रश्न</th> <th data-bbox="1045 489 1154 569">बच्चा १</th> <th data-bbox="1154 489 1263 569">बच्चा २</th> <th data-bbox="1263 489 1372 569">बच्चा ३</th> </tr> </thead> <tbody> <tr> <td data-bbox="673 569 1045 621">1. पुस्तकहरू पढेर</td> <td data-bbox="1045 569 1154 621"></td> <td data-bbox="1154 569 1263 621"></td> <td data-bbox="1263 569 1372 621"></td> </tr> <tr> <td data-bbox="673 621 1045 674">2. घरमा एकलै खेलेर</td> <td data-bbox="1045 621 1154 674"></td> <td data-bbox="1154 621 1263 674"></td> <td data-bbox="1263 621 1372 674"></td> </tr> <tr> <td data-bbox="673 674 1045 726">3. घरमा साथीहरूसँग खेलेर</td> <td data-bbox="1045 674 1154 726"></td> <td data-bbox="1154 674 1263 726"></td> <td data-bbox="1263 674 1372 726"></td> </tr> <tr> <td data-bbox="673 726 1045 779">4. घरबाहिर खेलेर</td> <td data-bbox="1045 726 1154 779"></td> <td data-bbox="1154 726 1263 779"></td> <td data-bbox="1263 726 1372 779"></td> </tr> <tr> <td data-bbox="673 779 1045 905">5. टेलिभिजन हेरेर, कम्प्युटर वा मोबाइल फोनमा (गेम) खेलेर</td> <td data-bbox="1045 779 1154 905"></td> <td data-bbox="1154 779 1263 905"></td> <td data-bbox="1263 779 1372 905"></td> </tr> <tr> <td data-bbox="673 905 1045 999">6. अन्य (उल्लेख गर्ने)<br/>_____</td> <td data-bbox="1045 905 1154 999"></td> <td data-bbox="1154 905 1263 999"></td> <td data-bbox="1263 905 1372 999"></td> </tr> <tr> <td data-bbox="673 999 1045 1052">7. थाहा छैन वा भन्न सकिदैन</td> <td data-bbox="1045 999 1154 1052"></td> <td data-bbox="1154 999 1263 1052"></td> <td data-bbox="1263 999 1372 1052"></td> </tr> </tbody> </table> | प्रश्न                     | बच्चा १ | बच्चा २ | बच्चा ३ | 1. पुस्तकहरू पढेर |  |  |  | 2. घरमा एकलै खेलेर |  |  |  | 3. घरमा साथीहरूसँग खेलेर |  |  |  | 4. घरबाहिर खेलेर |  |  |  | 5. टेलिभिजन हेरेर, कम्प्युटर वा मोबाइल फोनमा (गेम) खेलेर |  |  |  | 6. अन्य (उल्लेख गर्ने)<br>_____ |  |  |  | 7. थाहा छैन वा भन्न सकिदैन |  |  |  | Child 1:<br>Bp8.1.1<br>Bp8.1.2<br>Bp8.1.3<br>Bp8.1.4<br>Bp8.1.5<br>Bp8.1.6<br>Bp8.1.7<br><br>(For child 2 and 3 – similar format: Bp8.2.1 etc) |
| प्रश्न                                                   | बच्चा १                                                                                                                                                                                                                                                                                               | बच्चा २                                                                                                                                                                                                                                                                                                                                                                                                                                                                                                                                                                                                                                                                                                                                                                                                                                                                                                                                                                                                                                                                                                                                                                                                                                                                                                                                                                                                                                                                                                                                                                                                                                                                                                   | बच्चा ३                    |         |         |         |                   |  |  |  |                    |  |  |  |                          |  |  |  |                  |  |  |  |                                                          |  |  |  |                                 |  |  |  |                            |  |  |  |                                                                                                                                                |
| 1. पुस्तकहरू पढेर                                        |                                                                                                                                                                                                                                                                                                       |                                                                                                                                                                                                                                                                                                                                                                                                                                                                                                                                                                                                                                                                                                                                                                                                                                                                                                                                                                                                                                                                                                                                                                                                                                                                                                                                                                                                                                                                                                                                                                                                                                                                                                           |                            |         |         |         |                   |  |  |  |                    |  |  |  |                          |  |  |  |                  |  |  |  |                                                          |  |  |  |                                 |  |  |  |                            |  |  |  |                                                                                                                                                |
| 2. घरमा एकलै खेलेर                                       |                                                                                                                                                                                                                                                                                                       |                                                                                                                                                                                                                                                                                                                                                                                                                                                                                                                                                                                                                                                                                                                                                                                                                                                                                                                                                                                                                                                                                                                                                                                                                                                                                                                                                                                                                                                                                                                                                                                                                                                                                                           |                            |         |         |         |                   |  |  |  |                    |  |  |  |                          |  |  |  |                  |  |  |  |                                                          |  |  |  |                                 |  |  |  |                            |  |  |  |                                                                                                                                                |
| 3. घरमा साथीहरूसँग खेलेर                                 |                                                                                                                                                                                                                                                                                                       |                                                                                                                                                                                                                                                                                                                                                                                                                                                                                                                                                                                                                                                                                                                                                                                                                                                                                                                                                                                                                                                                                                                                                                                                                                                                                                                                                                                                                                                                                                                                                                                                                                                                                                           |                            |         |         |         |                   |  |  |  |                    |  |  |  |                          |  |  |  |                  |  |  |  |                                                          |  |  |  |                                 |  |  |  |                            |  |  |  |                                                                                                                                                |
| 4. घरबाहिर खेलेर                                         |                                                                                                                                                                                                                                                                                                       |                                                                                                                                                                                                                                                                                                                                                                                                                                                                                                                                                                                                                                                                                                                                                                                                                                                                                                                                                                                                                                                                                                                                                                                                                                                                                                                                                                                                                                                                                                                                                                                                                                                                                                           |                            |         |         |         |                   |  |  |  |                    |  |  |  |                          |  |  |  |                  |  |  |  |                                                          |  |  |  |                                 |  |  |  |                            |  |  |  |                                                                                                                                                |
| 5. टेलिभिजन हेरेर, कम्प्युटर वा मोबाइल फोनमा (गेम) खेलेर |                                                                                                                                                                                                                                                                                                       |                                                                                                                                                                                                                                                                                                                                                                                                                                                                                                                                                                                                                                                                                                                                                                                                                                                                                                                                                                                                                                                                                                                                                                                                                                                                                                                                                                                                                                                                                                                                                                                                                                                                                                           |                            |         |         |         |                   |  |  |  |                    |  |  |  |                          |  |  |  |                  |  |  |  |                                                          |  |  |  |                                 |  |  |  |                            |  |  |  |                                                                                                                                                |
| 6. अन्य (उल्लेख गर्ने)<br>_____                          |                                                                                                                                                                                                                                                                                                       |                                                                                                                                                                                                                                                                                                                                                                                                                                                                                                                                                                                                                                                                                                                                                                                                                                                                                                                                                                                                                                                                                                                                                                                                                                                                                                                                                                                                                                                                                                                                                                                                                                                                                                           |                            |         |         |         |                   |  |  |  |                    |  |  |  |                          |  |  |  |                  |  |  |  |                                                          |  |  |  |                                 |  |  |  |                            |  |  |  |                                                                                                                                                |
| 7. थाहा छैन वा भन्न सकिदैन                               |                                                                                                                                                                                                                                                                                                       |                                                                                                                                                                                                                                                                                                                                                                                                                                                                                                                                                                                                                                                                                                                                                                                                                                                                                                                                                                                                                                                                                                                                                                                                                                                                                                                                                                                                                                                                                                                                                                                                                                                                                                           |                            |         |         |         |                   |  |  |  |                    |  |  |  |                          |  |  |  |                  |  |  |  |                                                          |  |  |  |                                 |  |  |  |                            |  |  |  |                                                                                                                                                |
| 90.                                                      | तपाईंको बच्चा सामान्यतया घरबाहिर हरेक दिन (विदाको दिन बाहेक) कति समय खेल्ने गर्छ (साथी, छिमेकी वा आफन्तको मा समेत) ?                                                                                                                                                                                  | बच्चा १ .....घण्टा..... मिनेट प्रतिदिन<br>बच्चा २ .....घण्टा..... मिनेट प्रतिदिन<br>बच्चा ३ .....घण्टा..... मिनेट प्रतिदिन                                                                                                                                                                                                                                                                                                                                                                                                                                                                                                                                                                                                                                                                                                                                                                                                                                                                                                                                                                                                                                                                                                                                                                                                                                                                                                                                                                                                                                                                                                                                                                                | Bp9.1<br>Bp9.2<br>Bp9.3    |         |         |         |                   |  |  |  |                    |  |  |  |                          |  |  |  |                  |  |  |  |                                                          |  |  |  |                                 |  |  |  |                            |  |  |  |                                                                                                                                                |
| 91.                                                      | विदाको दिनमा (शनिवार वा अन्य पर्वमा) तपाईंको बच्चा सामान्यतया घरबाहिर कति समय खेल्ने गर्छ (साथी, छिमेकी वा आफन्तको मा समेत) ?                                                                                                                                                                         | बच्चा १ .....घण्टा..... मिनेट प्रतिदिन<br>बच्चा २ .....घण्टा..... मिनेट प्रतिदिन<br>बच्चा ३ .....घण्टा..... मिनेट प्रतिदिन                                                                                                                                                                                                                                                                                                                                                                                                                                                                                                                                                                                                                                                                                                                                                                                                                                                                                                                                                                                                                                                                                                                                                                                                                                                                                                                                                                                                                                                                                                                                                                                | Bp10.1<br>Bp10.2<br>Bp10.3 |         |         |         |                   |  |  |  |                    |  |  |  |                          |  |  |  |                  |  |  |  |                                                          |  |  |  |                                 |  |  |  |                            |  |  |  |                                                                                                                                                |
| 92.                                                      | तपाईंको बच्चा सामान्यतया हरेक दिन (विदाको दिन बाहेक) कति समय कम्प्युटर वा मोबाइल फोनमा (गेम) खेल्ने वा टेलिभिजन हेर्ने गर्छ ?                                                                                                                                                                         | बच्चा १ .....घण्टा..... मिनेट प्रतिदिन<br>बच्चा २ .....घण्टा..... मिनेट प्रतिदिन<br>बच्चा ३ .....घण्टा..... मिनेट प्रतिदिन                                                                                                                                                                                                                                                                                                                                                                                                                                                                                                                                                                                                                                                                                                                                                                                                                                                                                                                                                                                                                                                                                                                                                                                                                                                                                                                                                                                                                                                                                                                                                                                | Bp11.1<br>Bp11.2<br>Bp11.3 |         |         |         |                   |  |  |  |                    |  |  |  |                          |  |  |  |                  |  |  |  |                                                          |  |  |  |                                 |  |  |  |                            |  |  |  |                                                                                                                                                |
| 93.                                                      | विदाको दिनमा (शनिवार वा अन्य पर्वमा) तपाईंको बच्चा सामान्यतया कति समय कम्प्युटर वा मोबाइल फोनमा (गेम) खेल्ने वा टेलिभिजन हेर्ने गर्छ ?                                                                                                                                                                | बच्चा १ .....घण्टा..... मिनेट प्रतिदिन<br>बच्चा २ .....घण्टा..... मिनेट प्रतिदिन<br>बच्चा ३ .....घण्टा..... मिनेट प्रतिदिन                                                                                                                                                                                                                                                                                                                                                                                                                                                                                                                                                                                                                                                                                                                                                                                                                                                                                                                                                                                                                                                                                                                                                                                                                                                                                                                                                                                                                                                                                                                                                                                | Bp12.1<br>Bp12.2<br>Bp12.3 |         |         |         |                   |  |  |  |                    |  |  |  |                          |  |  |  |                  |  |  |  |                                                          |  |  |  |                                 |  |  |  |                            |  |  |  |                                                                                                                                                |

## VI. आमा र बच्चाको शारीरिक नापतौल

अब म तपाईंको र तपाईंको बच्चाहरुको उचाई र तौल नाप्ने छु ।

| 94.                                                               | के तपाईं अहिले गर्भवती हुनुहुन्छ ?(आमालाई सोध्ने)  | 1. अँ, छु । (प्रश्न नं. 99 मा जाने)<br>2. अँह, छुइन                                                                                                                                                                                                                   | Ba1           |                |                |                |     |  |                            |  |     |  |  |  |                         |
|-------------------------------------------------------------------|----------------------------------------------------|-----------------------------------------------------------------------------------------------------------------------------------------------------------------------------------------------------------------------------------------------------------------------|---------------|----------------|----------------|----------------|-----|--|----------------------------|--|-----|--|--|--|-------------------------|
| 95.                                                               | आमाको उचाइ                                         | _____ (सेन्टिमिटर)                                                                                                                                                                                                                                                    | Ba2           |                |                |                |     |  |                            |  |     |  |  |  |                         |
| 96.                                                               | आमाको तौल                                          | _____ (किलोग्राम)                                                                                                                                                                                                                                                     | Ba3           |                |                |                |     |  |                            |  |     |  |  |  |                         |
| 97.                                                               | आमाको कम्मरको नाप                                  | _____ (सेन्टिमिटर)                                                                                                                                                                                                                                                    | Ba4           |                |                |                |     |  |                            |  |     |  |  |  |                         |
| 98.                                                               | आमाको पुट्टा वा चाकको नाप                          | _____ (सेन्टिमिटर)                                                                                                                                                                                                                                                    | Ba5           |                |                |                |     |  |                            |  |     |  |  |  |                         |
| 99.                                                               | के तपाईंलाई उच्च रक्तचापको बिमारी छ ?              | 1. छ , _____ भन्ने 100 मा जाने                                                                                                                                                                                                                                        | Ba6           |                |                |                |     |  |                            |  |     |  |  |  |                         |
|                                                                   |                                                    | 2. छैन , _____ भन्ने 101 मा जाने                                                                                                                                                                                                                                      |               |                |                |                |     |  |                            |  |     |  |  |  |                         |
| 100.                                                              | के तपाईं उच्च रक्तचापको कुनै औषधी लिदै हुनुहुन्छ ? | 1. अँ , लिदैछु                                                                                                                                                                                                                                                        | Ba7           |                |                |                |     |  |                            |  |     |  |  |  |                         |
|                                                                   |                                                    | 2. अहँ , छैन                                                                                                                                                                                                                                                          |               |                |                |                |     |  |                            |  |     |  |  |  |                         |
| 101.                                                              | आमाको रक्तचाप                                      | <table border="1"> <thead> <tr> <th></th> <th>पहिलो रक्तचाप</th> <th>दोस्रो रक्तचाप</th> <th>तेस्रो रक्तचाप</th> </tr> </thead> <tbody> <tr> <td>SBP</td> <td></td> <td></td> <td></td> </tr> <tr> <td>DBP</td> <td></td> <td></td> <td></td> </tr> </tbody> </table> |               | पहिलो रक्तचाप  | दोस्रो रक्तचाप | तेस्रो रक्तचाप | SBP |  |                            |  | DBP |  |  |  | Ba8.1<br>Ba8.2<br>Ba8.3 |
|                                                                   |                                                    |                                                                                                                                                                                                                                                                       | पहिलो रक्तचाप | दोस्रो रक्तचाप | तेस्रो रक्तचाप |                |     |  |                            |  |     |  |  |  |                         |
|                                                                   |                                                    | SBP                                                                                                                                                                                                                                                                   |               |                |                |                |     |  |                            |  |     |  |  |  |                         |
| DBP                                                               |                                                    |                                                                                                                                                                                                                                                                       |               |                |                |                |     |  |                            |  |     |  |  |  |                         |
| पहिलो, दोस्रो र तेस्रो रक्तचाप लिँदा कम्तीमा ५ मिनेटको फरकमा लिने |                                                    |                                                                                                                                                                                                                                                                       |               |                |                |                |     |  |                            |  |     |  |  |  |                         |
|                                                                   |                                                    |                                                                                                                                                                                                                                                                       |               |                |                |                |     |  |                            |  |     |  |  |  |                         |
| 102.                                                              | बच्चाको उचाई (सेन्टिमिटरमा)                        | <table border="1"> <thead> <tr> <th>बच्चा १</th> <th>बच्चा २</th> <th>बच्चा ३</th> </tr> </thead> <tbody> <tr> <td></td> <td></td> <td></td> </tr> </tbody> </table>                                                                                                  | बच्चा १       | बच्चा २        | बच्चा ३        |                |     |  | Ba9.1<br>Ba9.2<br>Ba9.3    |  |     |  |  |  |                         |
|                                                                   |                                                    | बच्चा १                                                                                                                                                                                                                                                               | बच्चा २       | बच्चा ३        |                |                |     |  |                            |  |     |  |  |  |                         |
|                                                                   |                                                    |                                                                                                                                                                                                                                                                       |               |                |                |                |     |  |                            |  |     |  |  |  |                         |
|                                                                   |                                                    |                                                                                                                                                                                                                                                                       |               |                |                |                |     |  |                            |  |     |  |  |  |                         |
|                                                                   |                                                    |                                                                                                                                                                                                                                                                       |               |                |                |                |     |  |                            |  |     |  |  |  |                         |
| 103.                                                              | बच्चाको तौल (किलोग्राममा)                          | <table border="1"> <thead> <tr> <th>बच्चा १</th> <th>बच्चा २</th> <th>बच्चा ३</th> </tr> </thead> <tbody> <tr> <td></td> <td></td> <td></td> </tr> </tbody> </table>                                                                                                  | बच्चा १       | बच्चा २        | बच्चा ३        |                |     |  | Ba10.1<br>Ba10.2<br>Ba10.3 |  |     |  |  |  |                         |
|                                                                   |                                                    | बच्चा १                                                                                                                                                                                                                                                               | बच्चा २       | बच्चा ३        |                |                |     |  |                            |  |     |  |  |  |                         |
|                                                                   |                                                    |                                                                                                                                                                                                                                                                       |               |                |                |                |     |  |                            |  |     |  |  |  |                         |
|                                                                   |                                                    |                                                                                                                                                                                                                                                                       |               |                |                |                |     |  |                            |  |     |  |  |  |                         |
|                                                                   |                                                    |                                                                                                                                                                                                                                                                       |               |                |                |                |     |  |                            |  |     |  |  |  |                         |

### घरमा भएको समन्वय सम्बन्धि बिचार

| बिचार                | उत्तरदाताको | अन्तरवार्ताकारको |
|----------------------|-------------|------------------|
| 1. एकदम राम्रो       | □           | □                |
| 2. ठिकठिकै           |             |                  |
| 3. गाह्रो अनुभव      |             |                  |
| 4. उत्तर दिन नचाहेको |             |                  |

तपाईंलाई धन्यवाद । । ।
